# Supplementary material
Source: Research Square preprint supplement (doi:10.21203/rs.3.rs-9449162/v1)
Supplement: Supplementary file 1 [file a64b253e5858a233e14a6d8f.xlsx]

## Sheet: Overview
List of Supplementary Data Tables
Table S1	Attribution of illness by norovirus to transmission pathways and foods in subregions of six WHO Regions (mean, 2.5th (lower) percentile, median, and 97.5th (upper) percentile)
Table S2	Attribution of illness by rotavirus to transmission pathways and foods in subregions of six WHO Regions (mean, 2.5th (lower) percentile, median, and 97.5th (upper) percentile)
Table S3	Attribution of illness by Campylobacter spp. to transmission pathways and foods in subregions of six WHO Regions (mean, 2.5th (lower) percentile, median, and 97.5th (upper) percentile)
Table S4	Attribution of illness by Enteroaggregative E. coli (EAEC) to transmission pathways and foods in subregions of six WHO Regions (mean, 2.5th (lower) percentile, median, and 97.5th (upper) percentile)
Table S5	Attribution of illness by Enterotoxigenic E. coli (ETEC) to transmission pathways and foods in subregions of six WHO Regions (mean, 2.5th (lower) percentile, median, and 97.5th (upper) percentile)
Table S6	Attribution of illness by Enteropathogenic E. coli (EPEC) to transmission pathways and foods in subregions of six WHO Regions (mean, 2.5th (lower) percentile, median, and 97.5th (upper) percentile)
Table S7	Attribution of illness by Shiga toxin-producing E. coli (STEC) to transmission pathways and foods in subregions of six WHO Regions (mean, 2.5th (lower) percentile, median, and 97.5th (upper) percentile)
Table S8	Attribution of illness by non-typhoidal Salmonella (NTS) to transmission pathways and foods in subregions of six WHO Regions (mean, 2.5th (lower) percentile, median, and 97.5th (upper) percentile)
Table S9	Attribution of illness by Shigella spp. to transmission pathways and foods in subregions of six WHO Regions (mean, 2.5th (lower) percentile, median, and 97.5th (upper) percentile)
Table S10	Attribution of illness by Vibrio cholerae to transmission pathways and foods in subregions of six WHO Regions (mean, 2.5th (lower) percentile, median, and 97.5th (upper) percentile)
Table S11	Attribution of illness by Cryptosporidium spp. to transmission pathways and foods in subregions of six WHO Regions (mean, 2.5th (lower) percentile, median, and 97.5th (upper) percentile)
Table S12	Attribution of illness by Cyclospora to transmission pathways and foods in subregions of six WHO Regions (mean, 2.5th (lower) percentile, median, and 97.5th (upper) percentile)
Table S13	Attribution of illness by Entamoeba histolytica to transmission pathways and foods in subregions of six WHO Regions (mean, 2.5th (lower) percentile, median, and 97.5th (upper) percentile)
Table S14	Attribution of illness by Giardia spp. to transmission pathways and foods in subregions of six WHO Regions (mean, 2.5th (lower) percentile, median, and 97.5th (upper) percentile)
Table S15	Attribution of illness by Hepatitis A Virus to transmission pathways and foods in subregions of six WHO Regions (mean, 2.5th (lower) percentile, median, and 97.5th (upper) percentile)
Table S16	Attribution of illness by Brucella spp. to transmission pathways and foods in subregions of six WHO Regions (mean, 2.5th (lower) percentile, median, and 97.5th (upper) percentile)
Table S17	Attribution of illness by Listeria monocytogenes to transmission pathways and foods in subregions of six WHO Regions (mean, 2.5th (lower) percentile, median, and 97.5th (upper) percentile)
Table S18	Attribution of illness by Mycobacterium bovis/caprae/orygis to transmission pathways and foods in subregions of six WHO Regions (mean, 2.5th (lower) percentile, median, and 97.5th (upper) percentile)
Table S19	Attribution of illness by Salmonella Paratyphi to transmission pathways and foods in subregions of six WHO Regions (mean, 2.5th (lower) percentile, median, and 97.5th (upper) percentile)
Table S20	Attribution of illness by Salmonella Typhi to transmission pathways and foods in subregions of six WHO Regions (mean, 2.5th (lower) percentile, median, and 97.5th (upper) percentile)
Table S21	Attribution of illness by Trypanosoma cruzi to transmission pathways and foods in subregions of six WHO Regions (mean, 2.5th (lower) percentile, median, and 97.5th (upper) percentile)
Table S22	Attribution of illness by Echinococcus granulosus to transmission pathways and foods in subregions of six WHO Regions (mean, 2.5th (lower) percentile, median, and 97.5th (upper) percentile)
Table S22	Attribution of illness by Echinococcus multilocularis to transmission pathways in subregions of six WHO Regions (mean, 2.5th (lower) percentile, median, and 97.5th (upper) percentile)
Table S24	Attribution of illness by Ascaris to transmission pathways and foods in subregions of six WHO Regions (mean, 2.5th (lower) percentile, median, and 97.5th (upper) percentile)
Table S25	Attribution of illness by Fasciola & Fasciolopsis to transmission pathways and foods in subregions of six WHO Regions (mean, 2.5th (lower) percentile, median, and 97.5th (upper) percentile)
Table S26	Attribution of illness by Toxoplasma gondii to transmission pathways and foods in subregions of six WHO Regions (mean, 2.5th (lower) percentile, median, and 97.5th (upper) percentile)
Table S27	Attribution of illness by Clostridium botulinum to transmission pathways and foods in subregions of six WHO Regions (mean, 2.5th (lower) percentile, median, and 97.5th (upper) percentile)
Table S28	Attribution of illness by lead to transmission pathways and foods in subregions of six WHO Regions (mean, 2.5th (lower) percentile, median, and 97.5th (upper) percentile)

## Sheet: Table S1. Norovirus
	African Region												Region of the Americas												South-East Asia Region								European Region												Eastern Mediterranean Region
	AFRAB				AFRC				AFRD				AMRA				AMRB				AMRC				SEARB				SEARC				EURA				EURB				EURC				EMRA				EMRBC
Transmission pathway	Mean	Lower	Median	Upper	Mean	Lower	Median	Upper	Mean	Lower	Median	Upper	Mean	Lower	Median	Upper	Mean	Lower	Median	Upper	Mean	Lower	Median	Upper	Mean	Lower	Median	Upper	Mean	Lower	Median	Upper	Mean	Lower	Median	Upper	Mean	Lower	Median	Upper	Mean	Lower	Median	Upper	Mean	Lower	Median	Upper	Mean
Food	19.5	2.9	16.8	44.5	19.9	3	17	48.3	19.8	2.7	17.1	45.2	23.7	3.9	20.9	67.9	20.6	3.3	18.1	50.4	20.1	3	17.6	46.8	31.7	4.4	31	70.3	24.9	0.7	21.9	65.5	22.5	2.3	20.6	51.2	23.8	4.3	23.1	51.6	21.8	3.3	20.4	50.3	19.5	2.8	19	45.7	20.4
Contact with Animals (Domestic or Wild)	0	0	0	0.3	0	0	0	0.3	0	0	0	0.4	0	0	0	0	0	0	0	0	0	0	0	0	0	0	0	0	0	0	0	0	0.3	0	0	5.3	0	0	0	0	0	0	0	0	0	0	0	0	0
Human contact	65.6	36.8	66.3	88	65.2	34.1	66.5	88	65.2	33.5	66.6	88.4	62.9	2.6	66.7	87.9	66.5	37.3	67.2	88.8	66.3	38.4	67.3	88	46	6.8	49.2	80.3	39.7	2.5	40.8	77.4	63.5	30.4	64.1	88.3	58.4	29.4	59.3	84.2	59.7	29.6	60.2	85	66.9	41.2	67.7	86.9	66.1
Water	12.1	0.5	10.4	36.6	12.2	0.6	10.3	38.4	12.5	0.6	10.4	41.8	11.4	0.1	9.1	37.4	11	0.3	9.2	33	11.2	0.5	10.1	33.2	14.4	0.7	12.8	41.4	17.7	0.6	13.6	56.6	8.6	0.1	5.5	32.3	13.2	0.4	12.2	32.3	12.5	0.5	11.4	32.7	9.6	0	8.3	31.1	8.4
Soil	1.7	0	0.7	10.5	2	0	0.9	11.3	2.3	0	0.9	17.4	0.3	0	0	4.7	1.7	0	0.7	10.6	2.1	0	1.1	8.8	4.4	0.1	3	14.1	5.2	0.1	3.6	17.7	0.8	0	0	6.1	2	0.1	1.2	7.8	1.9	0	1.1	7.4	2.3	0	1.8	7.2	2.3
Other	1.2	0	0	11.5	0.8	0	0	10.5	0.1	0	0	2.1	1.8	0	0	19.4	0.3	0	0	5.6	0.3	0	0	5.8	3.6	0	1.8	13.8	12.4	0.1	7.5	46.3	4.4	0	2.9	17.5	2.5	0.1	1.6	11.8	4	0.1	2.3	15.9	1.8	0	0.6	11.4	2.7
Specific Foods
Beef	1.2	0	0.3	7.3	1.1	0	0.2	6.7	1.4	0	0.4	8.8	2.8	0	2	13.1	0.3	0	0	3.9	0.6	0	0	5.1	1.6	0.1	1	6.4	2.9	0.1	2.1	9.6	0.7	0	0	8.9	0.3	0	0	3.9	0.3	0	0	3.8	1.8558	6.15615e-09	0.967386	8.99518	1.63627
Small ruminants' meat	1	0	0.1	6.4	1	0	0	6.1	0.6	0	0	4.2	0.3	0	0	5.2	0.3	0	0	3.8	0.5	0	0	4.6	1.4	0.1	0.9	4.6	2.9	0.1	2	9.7	0.7	0	0	8.9	0.3	0	0	3.9	0.3	0	0	3.7	0.884207	6.70958e-09	0.496063	4.71256	0.735898
Pigs meat	1.3	0	0.3	8.2	1.4	0	0.3	9.2	0.6	0	0	4.3	2.8	0	1.9	12.6	0.7	0	0	5.3	0.6	0	0	5.1	1.4	0.1	1	4.6	1.6	0	0.7	5	0.8	0	0	11.5	0.7	0	0	5.6	0.6	0	0	5.3	0	0	0	0	0
Poultry Meat	1.2	0	0.2	7.3	1.3	0	0.3	8.8	1.7	0	0.6	11.2	3.7	0	2.3	21.2	0.6	0	0	5.1	0.7	0	0	5.7	1.6	0.1	1	6.5	13.2	0.1	3.8	50.4	1.2	0	0	16.7	1.1	0	0	8.6	1	0	0	8.1	1.96072	6.36362e-09	0.954678	10.8985	1.61906
Game	0.7	0	0	4.6	0.7	0	0	4.6	0.9	0	0	5.3	0.3	0	0	5.1	0.7	0	0	5.9	0.8	0	0	6.2	1.4	0.1	0.9	4.6	1.5	0	0.7	5.1	2.5	0	0.3	20.1	0.4	0	0	3.9	0.4	0	0	3.9	0.502136	5.49941e-05	0.00380932	4.07669	0.392358
Dairy	1.7	0	0.5	13.2	2	0	0.8	13.2	1.8	0	0.8	9.4	3.3	0	2.4	14.8	0.3	0	0	3.8	0.6	0	0	5.2	1.6	0.1	1	6.3	13.3	0.1	3.9	50.7	1.1	0	0	15.6	0.9	0	0.1	5.8	0.7	0	0	5.3	1.95	6.96505e-09	0.963249	10.5509	1.61115
Eggs	0	0	0	0	0	0	0	0	0	0	0	0	0	0	0	0.4	0	0	0	0	0	0	0	0	0	0	0	0	0	0	0	0	0.1	0	0	1.5	0	0	0	0	0	0	0	0	2.37097e-05	4.35628e-09	1.0423e-06	9.56441e-05	2.42166e-05
Vegetables	22.1	3.1	21	48.1	23.3	3.3	21.5	59.6	24.2	3.1	21.6	63.7	26.1	5	24.5	55.7	24.5	3.7	22.6	60.3	25.5	3.4	23.3	66	17.1	1.2	15.6	43.5	22.2	3.9	16.9	68.4	29.6	3.7	23.6	80.1	33.2	4.7	29.9	75.6	29.9	4	26.5	73.8	12.621	2.61336	10.0319	40.201	12.1549
Fruits and nuts	9.8	0.6	6.3	43.3	9.6	0.5	6.2	42.9	9.8	0.6	6.2	44.3	17.1	0	15.7	49	10.2	0.6	6.6	45.7	10.4	0.5	6.6	46.3	9.2	0.5	6.2	37.5	7.3	0.3	2.1	54.2	13.1	0.8	6.7	63.2	11.5	0.7	6.7	54.3	11.5	0.6	6.9	53.2	6.42904	6.22412e-09	4.55989	35.699	6.30844
Grains and beans	0	0	0	0	0	0	0	0	0	0	0	0	0.1	0	0	2.2	0	0	0	0	0	0	0	0	0	0	0	0	0	0	0	0	0.2	0	0	2.6	0	0	0	0	0	0	0	0	2.36601e-05	4.20063e-09	1.0385e-06	9.44747e-05	2.45798e-05
Oils and sugar	0	0	0	0	0	0	0	0	0	0	0	0	0.4	0	0	7.1	0	0	0	0	0	0	0	0	0	0	0	0	0	0	0	0	0.1	0	0	1.4	0	0	0	0	0	0	0	0	2.37034e-05	4.16361e-09	1.00601e-06	9.59477e-05	2.47276e-05
Finfish	1.9	0	0	15.5	3.7	0	0.9	17.8	2.2	0	0	16.3	3.7	0	2.7	18	2.9	0	0.5	17.1	1.4	0	0	15	7.1	0.5	5.2	18.8	12.7	1.3	11.9	26.2	2.7	0	0.2	16.4	3.3	0	0.3	22.9	3.3	0	0.1	22.9	13.1088	0.484012	13.6625	27.278	14.7285
Shellfish	57.4	22.6	58.5	82.7	54.4	5.7	57.1	80.9	54.7	4.5	58	82	38.4	7.7	37.7	68.7	57.4	14	59.6	84.1	56.7	8.2	59.6	84.8	54.2	28.3	54.6	77.4	21.5	4	13.1	71.2	44	1.6	51.1	85.1	45.9	5.5	49.7	82.2	49.7	5.8	54.2	83.4	59.1118	33.7666	59.8912	79.0184	59.2059
Seaweed	1.7	0	1	5.5	1.5	0	0.9	4.9	2	0	0.7	15.4	1	0	0.3	6.1	1.9	0	1.1	6.9	2.2	0	1.1	9.2	3.4	0.1	2.3	16	0.9	0	0.2	8.8	3.2	0	1.8	16	2.5	0.1	1.3	12.3	2.3	0.1	1.2	12	1.57646	6.09725e-09	0.923744	4.77057	1.60748
[truncated: 19 more columns]

## Sheet: Table S2. Rotavirus
	African Region												Region of the Americas												South-East Asia Region								European Region												Eastern Mediterranean Region
	AFRAB				AFRC				AFRD				AMRA				AMRB				AMRC				SEARB				SEARC				EURA				EURB				EURC				EMRA				EMRBC
Transmission pathway	Mean	Lower	Median	Upper	Mean	Lower	Median	Upper	Mean	Lower	Median	Upper	Mean	Lower	Median	Upper	Mean	Lower	Median	Upper	Mean	Lower	Median	Upper	Mean	Lower	Median	Upper	Mean	Lower	Median	Upper	Mean	Lower	Median	Upper	Mean	Lower	Median	Upper	Mean	Lower	Median	Upper	Mean	Lower	Median	Upper	Mean
Food	16.6	0.4	16.4	39.8	16.6	0.4	16.4	39.8	13.9	0.2	12.1	35.6	8.2	0.2	6.6	25.5	4.7	0.1	4	13.7	4.7	0.1	4	13.7	11.4	0	7.9	36.1	9.5	0	5.8	30.9	6.6	0.4	4.8	32.5	6.6	0.4	4.8	33.1	6.8	0.5	4.9	32.8	1.4	0	0.1	17	1.5
Contact with Animals (Domestic or Wild)	0	0	0	0	0	0	0	0	0	0	0	0	0	0	0	0	0	0	0	0	0	0	0	0	0.8	0	0	16.3	0	0	0	0	0	0	0	0	0	0	0	0	0	0	0	0	0	0	0	0	0
Human contact	60.7	21.2	62.2	89.4	60.7	21.2	62.2	89.4	66.1	30.7	66.7	92.1	84.1	66	85.1	95.9	55.6	12.5	59	90.4	55.6	12.5	59	90.4	76.6	40.5	80.4	95.2	75	37.4	77.6	94.1	70.1	33.6	72.2	91.6	70.5	33.2	72.6	92.2	70.6	33	73.1	91.9	76.8	53.5	76.8	93.5	76.7
Water	15.7	0.4	13.9	42.8	15.7	0.4	13.9	42.8	14.6	0.1	12.6	41.2	5.9	0	5.5	17	26.5	0.2	26.3	68.1	26.5	0.2	26.3	68.1	6	0.1	2.9	35.8	9.6	0	7.1	37.2	14.3	0.4	10.7	43.1	14.2	0.3	10.4	44	14.1	0.3	10	43.5	19.1	5.1	19.4	31.9	19
Soil	3.6	0	0.1	15.9	3.6	0	0.1	15.9	2.5	0	0	15.1	0.9	0	0.3	6.2	7.2	0	4.7	23.8	7.2	0	4.7	23.8	2.6	0	1.3	13.5	1.2	0	0.1	12.5	3.3	0	2	9.5	3.3	0	2	9.6	3.3	0	2	9.6	0.1	0	0	1.8	0.1
Other	3.4	0	2.9	9.8	3.4	0	2.9	9.8	2.9	0	2.2	9.6	0.8	0	0.1	7.7	6.1	1.4	5.5	14.1	6.1	1.4	5.5	14.1	2.5	0	2	10.8	4.7	0	4.6	9.8	5.7	0	3.5	18.5	5.3	0	3.1	18.4	5.2	0	3.1	18	2.6	0	0	26.9	2.7
Specific Foods
Beef	21.3	0	21.1	54.1	21.3	0	21.1	54.1	20.2	0	22.3	54.3	3.5	0	0.8	22.2	1	0	0.5	4.2	1	0	0.5	4.2	2.2	0	1.1	13.7	3.8	0	0.3	30.8	8.8	0	5.2	28.7	8.9	0	5.2	28.9	8.8	0	4.9	29.1	6.43277	0.953955	6.49443	10.7485	6.46215
Small ruminants' meat	6.9	0	5.6	23.7	6.9	0	5.6	23.7	6.9	0	5.7	23.9	1.2	0	0.1	11.6	1.1	0	0.5	4.3	1.1	0	0.5	4.3	2.1	0	1.1	11.2	2	0	0.2	15.7	0.4	0	0	8.4	0.5	0	0	9.2	0.5	0	0	9.1	4.48596	0.666253	4.25998	9.59267	4.45746
Pigs meat	5.7	0	5.7	16.3	5.7	0	5.7	16.3	5	0	4.3	15.4	2.8	0	0.6	17.4	2.4	0	1	8.7	2.4	0	1	8.7	1.9	0	1.1	7.8	1.7	0	0.2	11.5	1.7	0	1	10.6	1.7	0	1	10.1	1.7	0	1	10.7	0	0	0	0	0
Poultry Meat	4.6	0	4.3	13	4.6	0	4.3	13	4.3	0	3.7	12.9	3.6	0	0.8	23.1	0.2	0	0.1	0.7	0.2	0	0.1	0.7	1.6	0	0.9	6.8	0.9	0	0.1	9	1.9	0	0.9	14.4	1.9	0	1	13.8	1.9	0	1	14.1	6.43761	1.06441	6.51278	10.7693	6.43835
Game	2.1	0	0.2	9	2.1	0	0.2	9	1.3	0	0	8.2	1.2	0	0.1	11.6	1.7	0	0.7	8.1	1.7	0	0.7	8.1	1.9	0	1.1	8.4	1	0	0.1	7.8	22.3	0	19.8	62.4	20	0	10.8	62	19.9	0	9.2	62.8	0.336456	6.21045e-09	1.5711e-06	6.67604	0.365129
Dairy	3.7	0	0.2	15.4	3.7	0	0.2	15.4	2.5	0	0	14.4	2.8	0	1	13.9	1.1	0	0.7	4.2	1.1	0	0.7	4.2	2	0	1.1	9.3	2	0	0.2	13.2	8.2	0	4.3	28.8	8.3	0	4.3	28.7	8.5	0	4.5	28.8	8.86739	1.64111	8.15659	19.648	8.97301
Eggs	0	0	0	0	0	0	0	0	0	0	0	0	0	0	0	0	0	0	0	0	0	0	0	0	0.2	0	0	3.6	0	0	0	0	0	0	0	0	0	0	0	0	0	0	0	0	2.24431e-05	5.01311e-09	1.22182e-06	0.000101685	2.3109e-05
Vegetables	45.3	2.1	53.7	81.4	45.3	2.1	53.7	81.4	51.6	2.7	57.7	85.4	28.7	2	27.1	63.8	61.1	16.1	63.8	90.3	61.1	16.1	63.8	90.3	33.9	6.7	33.5	66.1	83	55	84.8	96.7	19.6	0.6	16	57	20.5	0.7	17.1	59	20.4	0.7	16.7	58.9	39.2849	18.5306	36.5711	69.7377	39.2937
Fruits and nuts	5.2	0.2	4	15.3	5.2	0.2	4	15.3	5.1	0.1	3.6	15.3	26.8	1.6	25.1	61.2	13.8	0.8	8.3	45	13.8	0.8	8.3	45	37	4.5	38.3	66.7	3.8	0.5	3.4	13.2	4.3	0	1.4	27.4	4.4	0	1.5	28.7	4.3	0	1.5	27.4	15.0444	4.10472	13.7673	31.7311	14.9644
Grains and beans	0	0	0	0	0	0	0	0	0	0	0	0	0	0	0	0	0	0	0	0	0	0	0	0	0.1	0	0	2.3	0	0	0	0	0	0	0	0	0	0	0	0	0	0	0	0	0.0920777	6.71137e-09	2.85014e-06	1.89064	0.097448
Oils and sugar	0	0	0	0	0	0	0	0	0	0	0	0	0	0	0	0	0	0	0	0	0	0	0	0	0.2	0	0	3.1	0	0	0	0	0	0	0	0	0	0	0	0	0	0	0	0	0.0913975	6.8319e-09	2.09225e-06	1.81685	0.0982949
Finfish	2.8	0	0.2	13.1	2.8	0	0.2	13.1	1.8	0	0	12	4.1	0	3.5	14.9	0.6	0	0.5	1.7	0.6	0	0.5	1.7	5.6	0	1.4	23.1	0.8	0	0.1	9.4	3.5	0	1.3	17.8	3.7	0	1.4	18.6	3.7	0	1.4	19.4	10.6771	3.92737	10.4089	19.4867	10.6347
Shellfish	1.4	0	0.2	6.6	1.4	0	0.2	6.6	0.7	0	0	4.6	23.2	1	21.2	55.6	12.6	0	10	44.8	12.6	0	10	44.8	6.4	0	1.6	30	0.5	0	0.1	4.4	20.6	0.6	18.8	54	21.3	0.6	19.6	55.9	21.6	0.5	19.7	56.4	7.89284	1.71454	8.35136	10.881	7.88179
Seaweed	1	0	0.1	5.4	1	0	0.1	5.4	0.4	0	0	2.4	1.9	0	1.1	11.9	4.4	0	1	17.5	4.4	0	1	17.5	5	0	1.2	18.7	0.5	0	0.1	2.5	8.7	0	5.1	28.6	8.8	0	5.2	28.7	8.8	0	5.2	29	0.357153	6.17535e-09	1.56459e-06	6.8324	0.333549
[truncated: 19 more columns]

## Sheet: Table S3. Campylobacter
	African Region												Region of the Americas												South-East Asia Region								European Region												Eastern Mediterranean Region
	AFRAB				AFRC				AFRD				AMRA				AMRB				AMRC				SEARB				SEARC				EURA				EURB				EURC				EMRA				EMRBC
Transmission pathway	Mean	Lower	Median	Upper	Mean	Lower	Median	Upper	Mean	Lower	Median	Upper	Mean	Lower	Median	Upper	Mean	Lower	Median	Upper	Mean	Lower	Median	Upper	Mean	Lower	Median	Upper	Mean	Lower	Median	Upper	Mean	Lower	Median	Upper	Mean	Lower	Median	Upper	Mean	Lower	Median	Upper	Mean	Lower	Median	Upper	Mean
Food	54.8	28.6	55.3	78.6	44.6	15.2	45.5	69.5	45.9	17.6	46.3	70.2	63	39.9	63.5	83.3	55.3	23.5	57	79.7	65.5	40.1	66.5	85.6	58.8	36.9	59.3	78.7	47.6	27.3	47.5	69.6	54.5	30.7	53.1	82.8	49.6	29.7	48.6	74.5	50.8	28	50.4	75.6	65.4	45.5	65.9	81.6	70.7
Contact with Animals (Domestic or Wild)	18.7	3.2	18.2	37.4	19.1	3.9	18.7	38.4	18.2	2.9	17.7	36.9	18.5	2.9	17.5	38.5	14.3	0.8	12.7	43.1	12.6	0.7	11.2	34.5	18.2	2.7	18.5	33.8	17.5	3.9	17.2	33.4	15.5	1.6	13.1	40	23.5	0.6	24.7	42.2	22.2	0	22.5	44.2	15.9	4.8	15.2	30.7	11.8
Human contact	9	0.5	6.9	32.6	8.5	0.5	6.9	23.6	8.7	0.5	7.4	23	1.8	0	0	18.9	10.5	0.6	10.4	23.4	6.5	0.1	5.5	17.9	6.7	0.4	6	17.4	8.5	0.6	7.7	19.5	4.2	0	1.5	25.3	8.5	0	8.3	19.7	8.5	0	8.4	19.8	7.3	0.4	6.9	17.8	6.3
Water	12.4	0.9	9.9	35.3	21.6	2.7	20.7	46.9	21	3.2	20.3	44.7	14	0.9	13.2	31.6	15.5	0.7	15.4	35.2	12.3	0.7	11	32	10.6	1.3	9	30.2	19.3	2.9	18.9	37.6	22.7	1.3	23.8	46	14.2	2.7	12.1	35.3	14.1	3	12	35	7.3	0.8	6	26.9	7.7
Soil	5	0.5	2.9	19	6	0.5	4	20.7	6.1	0.5	4.1	20.1	2.2	0	1.1	12.5	3.2	0.1	1.4	26.4	2.9	0.1	1.3	11.8	4.9	0.6	3.5	16.4	6.6	0.5	5.1	21.5	2.4	0	0.1	17	4.1	0.2	2.8	14.3	4.1	0.2	2.8	14.4	3.5	0.2	3	12	3.5
Other	0.2	0	0	3.2	0.1	0	0	2.3	0.1	0	0	2.3	0.4	0	0	7.7	1.2	0	0	7.1	0.2	0	0	3	0.8	0	0	13.9	0.5	0	0	10.6	0.7	0	0	8.3	0.2	0	0	3.4	0.2	0	0	3.7	0.6	0	0	5.3	0
Specific Foods
Beef	11.3	1.2	10.1	27	12.8	0.6	10.6	36.3	12.3	0.5	10.2	34.2	10	0.2	7.5	33.9	9.3	0.5	8.2	25	9.3	0.5	9.2	19.8	7	0.6	5.6	19.9	5.9	0.5	4.5	19.5	5.7	0.6	4.4	23.5	5	0.5	3.4	18.9	5.2	0.5	3.5	18.5	12.1049	1.41644	12.8968	20.6399	7.61195
Small ruminants' meat	7.4	0.8	5.6	25	12.2	0.5	9.7	34.9	12.2	0.5	10.3	33.2	2.9	0.1	2.2	11.6	6.3	0.5	4.6	19.6	2	0	1	9.6	6	0.6	5.1	17.1	5.4	0.4	4.4	13.8	4.4	0	3.1	22.5	5.9	0.4	5	15.8	6	0.5	5.1	15.9	8.48489	0.695729	8.633	15.5035	3.3162
Pigs meat	5.2	0.5	3.8	16.3	7.8	0.5	5.5	33.2	7.3	0.5	5.1	30.2	8.2	0.1	5.8	27.6	8.6	0.6	6	26.3	5.9	0.5	4.8	14.5	6.4	0.6	4.6	21.8	5.7	0.4	4.6	15.6	6.1	0	4.9	21.2	5.6	0.6	5.1	13.4	5.6	0.3	5.1	13.5	0	0	0	0	0
Poultry Meat	49	21.2	49.6	74.4	44.2	16.1	44.4	71	41.9	16	42	68.4	35.6	11.4	34.1	68.9	47.8	9.1	50.7	71.6	55.3	31	56.2	75.6	52.3	23.1	53.5	74.3	36.8	11	37.3	60.8	73.7	44.2	76	92.2	51.1	28.8	51.9	69.3	50.4	26.1	51.4	69.8	61.0159	40.0883	61.5878	76.0608	65.9071
Game	2.4	0.1	1.5	11.1	2.5	0	1.2	16.8	2.3	0	1.1	16	3.6	0	2.5	14.6	5	0.1	3.1	29	0.4	0	0.1	3.1	0.9	0	0	10.4	1.6	0	0.9	6.4	1.1	0	0.2	7.4	1.7	0.1	1.4	4.7	1.8	0	1.2	6	0.467388	5.62663e-09	2.69017e-05	4.26688	2.46067
Dairy	18.7	0.9	17.9	43.3	5.4	0	0.9	30.3	7.1	0	1.2	31.5	27.6	1.9	26.3	60.4	13.4	1.2	11.1	41.4	13.2	0.6	11.3	38.8	15.9	1.1	12.9	48.4	28.2	4.1	27.4	54.1	4.8	0.1	0.9	33	18	2.2	15.3	41.2	18.3	1.9	15.6	41.7	10.6643	0.810515	8.70906	40.3176	10.6215
Eggs	0.3	0	0	5	0.3	0	0	6	0.3	0	0	5.6	0.2	0	0	4.7	0.1	0	0	2	0	0	0	0	0.2	0	0	3.4	0.2	0	0	3.9	0.1	0	0	2.8	0	0	0	0	0	0	0	0	0.256461	5.30896e-09	1.74906e-06	4.97025	2.50641e-05
Vegetables	1.8	0	0	22.9	11.1	0.6	9.1	28.7	11.5	0.5	10	28.9	4.2	0	3.2	15.5	4.9	0.5	4.1	13.3	9.3	0.5	9.1	19.5	3.9	0	1.8	16.5	5.4	0.4	4.4	13.7	1.6	0	0	17.8	6.5	0.6	5.5	18.8	6.2	0.6	5	19	3.76711	0.483109	3.21226	12.2792	5.99561
Fruits and nuts	1.5	0	0	15.1	1.3	0	0.3	8	1.4	0	0.6	7.3	1.7	0	0.9	12	1.9	0	1.1	7.2	1.8	0	1	6.9	1.4	0	0.8	7	1.6	0	0.9	6.2	0.5	0	0	7.4	1.6	0	1.1	4.8	1.8	0	1.2	6.6	2.04286	0.0870629	1.77069	5.0664	1.86364
Grains and beans	0.3	0	0	3.7	0.6	0	0	4.4	0.8	0	0	4.6	0.6	0	0.1	3.3	1.4	0	1	4.3	1.2	0	1	3.8	0.7	0	0	6.8	1.7	0	0.9	7.7	0.3	0	0	4.5	1.5	0	1.3	4.6	1.6	0	1.3	4.7	0.464949	4.88723e-09	2.71214e-05	4.25452	1.31117
Oils and sugar	0	0	0	0.5	0.1	0	0	1.1	0.1	0	0	1.1	0.2	0	0	1.7	0	0	0	0.1	0	0	0	0.1	0.2	0	0	4.7	0.2	0	0	4.5	0.2	0	0	4.2	0	0	0	0.5	0	0	0	0.5	0.0677976	5.66794e-09	1.50573e-05	1.28188	0.000546242
Finfish	0.3	0	0	3.9	0.5	0	0	4	1.3	0	0.5	6.6	2.1	0	1.3	10.5	0.4	0	0.1	2.9	0.4	0	0.1	2.8	1.8	0	0.7	8.6	1.7	0	1	5.9	0.3	0	0	5.2	1.1	0	0.6	4.4	1	0	0.6	4.4	0.167986	5.02645e-09	9.5821e-05	3.04011	0.218007
Shellfish	1.7	0	0	19.2	1.4	0	0.4	8.8	1.6	0	0.6	8.7	2.9	0	1.8	14.2	1	0	0.2	9.1	0.7	0	0.1	8.9	3.2	0	1.1	13.2	5.4	0.4	4.4	13.9	0.9	0	0	9.6	1.9	0	0.6	11.8	1.9	0	0.6	11.7	0.494692	5.65615e-09	0.0001029	9.13492	0.533484
Seaweed	0	0	0	0	0	0	0	0.7	0	0	0	0.6	0.2	0	0	2	0.1	0	0	0.9	0.3	0	0.1	1	0.2	0	0	3	0.2	0	0	3.5	0.3	0	0	5.2	0.1	0	0	1	0.1	0	0	1	0.000737663	4.61969e-09	1.87528e-05	0.00851708	0.160078
[truncated: 19 more columns]

## Sheet: Table S4. EAEC
	African Region												Region of the Americas												South-East Asia Region								European Region												Eastern Mediterranean Region
	AFRAB				AFRC				AFRD				AMRA				AMRB				AMRC				SEARB				SEARC				EURA				EURB				EURC				EMRA				EMRBC
Transmission pathway	Mean	Lower	Median	Upper	Mean	Lower	Median	Upper	Mean	Lower	Median	Upper	Mean	Lower	Median	Upper	Mean	Lower	Median	Upper	Mean	Lower	Median	Upper	Mean	Lower	Median	Upper	Mean	Lower	Median	Upper	Mean	Lower	Median	Upper	Mean	Lower	Median	Upper	Mean	Lower	Median	Upper	Mean	Lower	Median	Upper	Mean
Food	38.5	8.7	39.2	67.1	38.4	8.8	39.1	66.3	38.7	8.7	39.4	66.5	55.1	27.1	56	77.4	55.2	27.4	56.1	76.9	55.3	28.2	56.1	77.4	55.7	36.3	56.3	71	55.7	36.3	56.3	71	50.5	22.7	50.8	77.7	42.9	18.9	42.1	72.5	42.9	18.9	42.1	72.5	80.4	60.1	81.4	92	80.4
Contact with Animals (Domestic or Wild)	16.1	2.5	14.9	37.9	16.1	2.3	15.2	37.7	16	2.3	15	37.2	2.8	0	1.9	20.7	2.9	0.1	1.9	21.2	2.9	0.1	1.9	20.1	1.3	0.1	0.5	11.9	1.3	0.1	0.5	11.9	6.2	0.1	4.8	23.1	7.2	0.4	5.5	25	7.2	0.4	5.5	25	6.2	0	5.5	13.1	6.2
Human contact	14.5	1.6	13.5	36	14.8	1.6	13.8	35.9	14.6	1.7	13.7	35.4	19.6	3.8	19	39.3	19.7	3.6	19.1	39.6	19.6	3.7	19	39.1	5	0.6	4.9	11.6	5	0.6	4.9	11.6	23.7	5.8	23	44.2	23.8	6.7	23.2	43.4	23.8	6.7	23.2	43.4	2	0	1.3	10.4	2
Water	26.2	3.3	26.3	50.6	26.1	3.2	26.3	49.8	26.2	3.3	26.2	50.1	19	2.9	16.5	47.6	18.6	2.9	16	47.5	18.7	3.3	16.4	47.1	34.9	20.4	34.6	51.6	34.9	20.4	34.6	51.6	18.7	0.2	18.9	44.9	25.2	0.8	26.8	49.1	25.2	0.8	26.8	49.1	10.9	1.3	9.2	32.3	10.9
Soil	4	0.3	3.7	9.6	4	0.3	3.6	9.6	3.9	0.3	3.6	9.5	3.5	0.5	3	8.4	3.5	0.5	3	8.6	3.5	0.4	3	8.7	1.3	0.1	0.5	12.9	1.3	0.1	0.5	12.9	0.5	0	0	9.2	0.5	0	0	9.4	0.5	0	0	9.4	0.6	0	0	5.1	0.6
Other	0.6	0	0	5.9	0.6	0	0	6	0.6	0	0	6	0	0	0	0.9	0	0	0	0.9	0	0	0	0.8	1.8	0	1.1	12	1.8	0	1.1	12	0.3	0	0	6.5	0.3	0	0	6	0.3	0	0	6	0	0	0	0	0
Specific Foods
Beef	14.9	3.2	14.2	32.2	15	3.3	14.5	31.7	14.9	3.4	14.4	31.9	11.8	2.8	10.2	33.1	11.7	2.8	10.1	33.5	11.7	2.7	10.1	33.5	25.6	7.9	23.4	50.4	25.6	7.9	23.4	50.4	1.6	0	0	13.9	2.5	0	0	15.1	2.5	0	0	15.1	17.6802	12.4517	16.9866	30.1645	17.6802
Small ruminants' meat	9.5	1.3	9	18.6	9.5	1.3	9	18.6	9.5	1.3	9.1	18.5	1.6	0	1	8.3	1.7	0.1	1	11	1.7	0	1	11.3	15.1	0.1	12.7	40.7	15.1	0.1	12.7	40.7	0.6	0	0	8.4	1	0	0	9.5	1	0	0	9.5	10.4178	5.92197	10.0005	19.6592	10.4178
Pigs meat	9.6	1.2	9.2	22.6	9.5	1.2	9	22.6	9.5	1.2	9.1	22.2	3.2	0.5	2.9	7.9	3.5	0.5	2.9	11.6	3.5	0.5	2.9	12	2.6	0.2	1.6	9.5	2.6	0.2	1.6	9.5	0.9	0	0	12.4	2.1	0	0	17.5	2.1	0	0	17.5	0	0	0	0	0
Poultry Meat	14.5	2.7	13.2	29.2	14.6	2.6	13.4	29.1	14.6	2.7	13.4	29	3.8	0.5	2.9	17.7	3.8	0.4	2.9	17.6	3.8	0.5	3	18.7	3.9	0.4	1.9	20.8	3.9	0.4	1.9	20.8	3.5	0	0	45.9	2.8	0	0	45.6	2.8	0	0	45.6	7.94198	3.42647	6.2223	21.1318	7.94198
Game	4	0.1	3	10.9	4	0.1	3	11	4	0	3	10.9	0.9	0	0.1	3.9	0.9	0	0.1	3.9	0.9	0	0.1	3.8	0.9	0.1	0.6	4.4	0.9	0.1	0.6	4.4	0.7	0	0	7.5	1.3	0	0	8	1.3	0	0	8	0.860971	5.44856e-09	0.832383	2.04766	0.860971
Dairy	9.7	1.7	8.8	22.4	9.6	1.6	8.7	22.2	9.5	1.6	8.7	21.7	6.8	1.1	5.7	28.5	6.8	1	5.7	27.4	6.9	1.1	5.7	29.4	10.9	0.8	9.9	25.1	10.9	0.8	9.9	25.1	1.8	0	0	20	2.3	0	0	21.8	2.3	0	0	21.8	11.7606	8.00592	11.0517	22.5439	11.7606
Eggs	0.7	0	0	6.4	0.7	0	0	6.4	0.7	0	0	6.3	0.1	0	0	2.5	0.1	0	0	2.4	0.1	0	0	2.3	0.4	0	0	8.7	0.4	0	0	8.7	0.3	0	0	5.9	0.3	0	0	5.4	0.3	0	0	5.4	2.65827e-05	5.31698e-09	1.01011e-06	0.000103284	2.65827e-05
Vegetables	23.9	6.3	24.8	37.6	23.9	5.9	24.8	37.6	23.8	6.4	24.8	37.5	37.5	14.8	37.9	58.5	37.4	13.9	37.9	58.9	37.4	14.1	37.8	58.1	22	5.3	21.2	43.7	22	5.3	21.2	43.7	37.7	13.8	37.7	61.3	34.5	12	33.9	59.7	34.5	12	33.9	59.7	38.1219	24.7703	39.5466	43.9935	38.1219
Fruits and nuts	3.6	0	0	17.5	3.6	0	0	17.5	3.5	0	0	17.3	13.2	2.7	11.2	28.6	13	2.2	10.9	28.6	13	2.3	10.8	28.7	11.2	1.6	10.8	20.9	11.2	1.6	10.8	20.9	32.2	10	31.3	57.5	31.8	10.3	31.3	57.5	31.8	10.3	31.3	57.5	4.79444	0.331485	4.91832	7.00045	4.79444
Grains and beans	2.4	0	1.4	9.1	2.4	0	1.4	9	2.5	0	1.6	9.1	3.2	0	1.7	12.4	3.3	0	1.8	12.5	3.3	0	1.9	12.4	0.5	0	0	9.1	0.5	0	0	9.1	12.2	1.4	9	43.6	9.5	0.7	6.8	42.1	9.5	0.7	6.8	42.1	2.85676	0.0973864	2.90505	4.75232	2.85676
Oils and sugar	0.7	0	0	3.5	0.7	0	0	3.5	0.7	0	0	3.5	0.1	0	0	2.2	0.1	0	0	2.6	0.1	0	0	2.2	0.1	0	0	2.9	0.1	0	0	2.9	0.3	0	0	5.6	0.2	0	0	4.6	0.2	0	0	4.6	2.54258	3.46206e-07	2.80539	4.18987	2.54258
Finfish	3.5	0	0	14.2	3.6	0	0	14.1	3.6	0	0	14.1	0.5	0	0	10.6	0.6	0	0	11.1	0.5	0	0	10.7	3.4	0.3	1.7	19.3	3.4	0.3	1.7	19.3	0.8	0	0	12.9	0.7	0	0	12.1	0.7	0	0	12.1	1.20205	5.98927e-09	1.05799	4.32375	1.20205
Shellfish	1.9	0	0.3	8.8	1.8	0	0.1	8.6	1.9	0	0.4	8.8	17.3	1.1	17.7	30.3	17.2	1.1	17.6	30.2	17.1	1.1	17.5	30.3	3.2	0	3	9.9	3.2	0	3	9.9	6.6	1.3	6.7	11.3	10	1.4	8.9	24.2	10	1.4	8.9	24.2	0.974341	5.5165e-09	0.963888	2.07947	0.974341
Seaweed	1.2	0	0.4	6.8	1.2	0	0.4	7	1.2	0	0.4	7.2	0	0	0	0.5	0	0	0	0.4	0	0	0	0.5	0.1	0	0	2.8	0.1	0	0	2.8	0.7	0	0	6.4	1	0	0	6.7	1	0	0	6.7	0.846315	4.56381e-09	0.807409	2.0511	0.846315
[truncated: 19 more columns]

## Sheet: Table S5. EPEC
	African Region												Region of the Americas												South-East Asia Region								European Region												Eastern Mediterranean Region
	AFRAB				AFRC				AFRD				AMRA				AMRB				AMRC				SEARB				SEARC				EURA				EURB				EURC				EMRA				EMRBC
Transmission pathway	Mean	Lower	Median	Upper	Mean	Lower	Median	Upper	Mean	Lower	Median	Upper	Mean	Lower	Median	Upper	Mean	Lower	Median	Upper	Mean	Lower	Median	Upper	Mean	Lower	Median	Upper	Mean	Lower	Median	Upper	Mean	Lower	Median	Upper	Mean	Lower	Median	Upper	Mean	Lower	Median	Upper	Mean	Lower	Median	Upper	Mean
Food	66.8	38.6	68.3	86.6	38.5	16	39.3	58.6	75.1	52	75.8	89.8	37.2	14.2	37	61.6	47.7	18.5	47.7	75.4	47.7	18.5	47.7	75.4	34.5	17.6	33.2	57.5	23.4	8.8	20.3	49.5	50.7	27.7	51	71	48.6	29.3	48.7	66.3	48.6	29.3	48.7	66.3	80.1	57.5	81.5	92.3	78.9
Contact with Animals (Domestic or Wild)	18.5	3.1	18.6	38.9	14.2	2.7	13.4	31.1	5	1.1	3.9	21	6	0.9	4.8	25.2	8.2	0	5.3	25	8.2	0	5.3	25	9.5	1.2	7.5	27.2	17	2.4	16.6	34.4	14.8	3.3	14.4	33.8	11.9	3.1	11	32.1	11.9	3.1	11	32.1	6.6	1.9	5.4	18.4	6.5
Human contact	6.6	1	5.5	20.5	15.5	1.9	15.1	31.4	1.1	0	0.1	11	39.6	11.3	39.6	62	10.4	1	9.1	27.2	10.4	1	9.1	27.2	12.7	1.2	10.7	35.1	17.2	3	14.3	42.9	21.7	3.5	22.7	39.1	26.2	7.9	26.6	42.1	26.2	7.9	26.6	42.1	2	0	1.3	9.6	1.7
Water	4.5	0.5	3.3	21.1	19.7	5.8	19.6	34.9	14.3	0.9	13.1	34.2	12.6	2.2	10.3	39.2	28.4	6.6	26.3	56.5	28.4	6.6	26.3	56.5	27.7	6.6	28.7	41.5	24.9	6.6	25.2	40.9	6.7	1	5.5	22.2	10.4	2.2	10	23	10.4	2.2	10	23	10.7	1.1	9.1	31.9	12.5
Soil	3.3	0.4	2.3	15.5	8.4	0.7	7.8	20.5	2.1	0.5	1.9	7.8	4.4	0.2	4	10	4.7	0	3.8	14.7	4.7	0	3.8	14.7	10.2	0.6	9.6	22	13.4	2.2	13.8	25.3	5.9	0.9	5.4	13.8	2	0.3	1.2	10.2	2	0.3	1.2	10.2	0.5	0	0	5.4	0.2
Other	0.2	0	0	5	3.8	0	3.7	8.6	2.3	0.6	1.7	9.4	0.2	0	0	4.5	0.5	0	0	4.4	0.5	0	0	4.4	5.4	0.2	5.8	10.4	4	0	4.1	10	0.3	0	0	5.3	0.8	0	0	5.1	0.8	0	0	5.1	0.1	0	0	2.5	0.1
Specific Foods
Beef	37.5	17.9	37.4	57.3	11.1	1	9.1	34	44	29.5	44.5	54.4	18	1.6	17	45.4	29.7	12	29.6	47.7	29.7	12	29.6	47.7	10.3	1.3	4.7	36.6	13.6	2.3	13.7	27	26.7	5.6	27.5	44.7	11.3	2.9	10.4	31.1	11.3	2.9	10.4	31.1	18.5881	10.9226	17.0276	43.3055	20.0124
Small ruminants' meat	19.8	4.9	19.6	36.2	8.2	0.4	6.8	26.7	23.4	7.2	22.3	39.7	3.5	0.2	2.7	16.6	6.3	0	5.8	17.7	6.3	0	5.8	17.7	2.3	0	1.2	12.4	8.3	2.1	8.1	14.8	11.1	1.6	10.2	26.2	5.9	1	5.1	20.4	5.9	1	5.1	20.4	10.4209	5.23748	9.96843	22.8028	11.0946
Pigs meat	5.4	1.2	4.8	13.3	5.5	0.4	4.3	16.9	2.4	0	0.5	18.1	9.8	0.4	7.9	27.4	9.3	1.2	9.3	19	9.3	1.2	9.3	19	8.8	0	3.4	40.4	8.2	1.6	7	18.5	5.6	0.6	4.8	21.3	7.1	1.2	6.6	20.8	7.1	1.2	6.6	20.8	0	0	0	0	0
Poultry Meat	3.1	0	2.6	15.4	14.2	1	14.1	29.5	1.1	0	0	18.4	14.5	0.4	14.1	33.7	7.6	1	7.5	14.9	7.6	1	7.5	14.9	13	0	10.2	42.1	12.9	5.2	12.8	20.1	6.8	1.4	5.5	23.4	13.5	2.8	13.1	27.3	13.5	2.8	13.1	27.3	7.74024	2.63247	6.18898	21.2829	6.87886
Game	1.8	0	1.7	5.5	4.2	0.2	2	23.3	0.9	0	0	15.7	2.7	0.3	2.6	5.7	0.9	0	0	6.4	0.9	0	0	6.4	0.8	0	0.5	4.2	3.2	0.8	2.9	6.8	5.4	0.5	4.9	12.9	2.4	0.5	2	9.3	2.4	0.5	2	9.3	1.09827	5.1956e-09	0.852576	5.88274	0.955611
Dairy	17.7	5.5	17.5	29.9	11.5	1.1	11.1	24.5	18.3	3.6	18.7	31.8	20.4	6.3	18.6	42.4	17	3.3	16.2	34.5	17	3.3	16.2	34.5	13.7	1.8	13.4	27.3	9.3	2	9	18.7	10.3	1.1	9.6	32	7.3	1.6	6.1	29.4	7.3	1.6	6.1	29.4	11.8496	5.75385	11.04	29.2758	12.1597
Eggs	0.3	0	0	4.9	3.1	0	2.3	8.9	0.5	0	0	9.8	0.1	0	0	2.2	0	0	0	0	0	0	0	0	2.7	0	2.5	7.2	0.8	0	0	4.6	0.4	0	0	7.2	0.3	0	0	5.5	0.3	0	0	5.5	2.63171e-05	5.20788e-09	1.06153e-06	0.000102611	2.59718e-05
Vegetables	7.8	2.1	7.4	15.3	18.2	2.5	18.1	38.6	6.6	0.1	4	19.5	20.8	1.1	20	43.8	13.6	0.9	11.6	37.7	13.6	0.9	11.6	37.7	18.6	2.7	17.8	36.8	12.3	2.1	12.7	26.6	20.3	3.1	20.1	39.1	29.5	11.5	30	42.2	29.5	11.5	30	42.2	36.5649	16.5669	39.0421	44.4129	38.979
Fruits and nuts	5.7	0.5	5.7	12	7.3	0.3	5.8	22.9	1.3	0.1	0.5	8.7	5.5	0.5	4.8	20.1	5.1	0	4.4	14.2	5.1	0	4.4	14.2	6.6	0.2	6.2	17.1	6.4	1.6	5.3	17.5	4.9	0.5	4.6	13.7	6.1	1.2	5.8	14.6	6.1	1.2	5.8	14.6	4.91216	0.186792	4.90051	9.04834	3.87795
Grains and beans	0.2	0	0	3.5	4.5	0.1	3.6	12.1	0.2	0	0	2.9	2.1	0	0.5	21.6	0.1	0	0	0.8	0.1	0	0	0.8	4.8	0	4.8	13.7	7.5	1.5	6.8	17.9	2.2	0	1	23.1	6	0.2	5.4	23.7	6	0.2	5.4	23.7	3.00984	0.0924401	2.87056	7.6597	2.41357
Oils and sugar	0	0	0	0.4	1.3	0	0.7	4.4	0.2	0	0	3.1	0.9	0	0.4	3.8	0	0	0	0	0	0	0	0	0.2	0	0	4.6	2.3	0	1.8	9	1.3	0	1	6.3	2.1	0.1	1.8	6.6	2.1	0.1	1.8	6.6	2.57665	2.99426e-07	2.7663	4.74357	1.61864
Finfish	0.4	0	0	7.5	7	0	6.6	16.3	0.6	0	0	9.6	0.4	0	0	7.2	3.8	0	3.6	9.5	3.8	0	3.6	9.5	11.1	0.2	12.2	20.9	7	1.4	6.3	14.5	2.5	0	2	11.8	2.4	0.3	2	9.9	2.4	0.3	2	9.9	1.23004	5.45093e-09	1.04556	4.80754	0.732385
Shellfish	0.3	0	0	6.8	3.2	0	2.3	10.1	0.5	0	0	9.3	1.3	0	0	26.5	2.7	0	2.1	9	2.7	0	2.1	9	6.5	0.2	6.2	17.2	6.5	1.1	6	13.9	2.4	0	2	9.8	5.5	0.3	5.4	11.7	5.5	0.3	5.4	11.7	1.08669	5.46656e-09	0.950114	4.04218	0.739405
Seaweed	0	0	0	0.5	0.8	0	0.4	5.9	0.2	0	0	3.2	0	0	0	0.4	3.7	0	2	13.7	3.7	0	2	13.7	0.8	0	0.5	3.4	1.8	0	1.2	5.7	0.2	0	0	3.8	0.7	0	0	4.3	0.7	0	0	4.3	0.92269	4.91325e-09	0.825862	3.04063	0.537844
[truncated: 19 more columns]

## Sheet: Table S6. ETEC
	African Region												Region of the Americas												South-East Asia Region								European Region												Eastern Mediterranean Region
	AFRAB				AFRC				AFRD				AMRA				AMRB				AMRC				SEARB				SEARC				EURA				EURB				EURC				EMRA				EMRBC
Transmission pathway	Mean	Lower	Median	Upper	Mean	Lower	Median	Upper	Mean	Lower	Median	Upper	Mean	Lower	Median	Upper	Mean	Lower	Median	Upper	Mean	Lower	Median	Upper	Mean	Lower	Median	Upper	Mean	Lower	Median	Upper	Mean	Lower	Median	Upper	Mean	Lower	Median	Upper	Mean	Lower	Median	Upper	Mean	Lower	Median	Upper	Mean
Food	47.8	13.4	49.6	74.6	61.8	38.1	63	78.6	61.6	38	62.7	78.5	60.3	36.8	60.3	83.5	47.1	11	47.8	80.5	37.4	5.6	37.1	73.8	49.1	28.7	48.8	71.5	31.6	15.7	31.3	50	57.2	21.8	59.4	82.3	46	23.8	46.6	64.5	46	23.8	46.6	64.5	79.4	58.6	80.6	91.5	78.3
Contact with Animals (Domestic or Wild)	18.8	4.8	18.8	31.5	15.8	4.2	16.1	26.1	15.7	3.8	16.2	26	1.2	0	0	23.2	2.2	0	2.1	5.2	5	0	2	21.8	4.5	0.1	2.5	22.3	10.6	2.2	10.5	20.2	2.2	0	0	28.1	8.9	0	7.9	30.6	8.9	0	7.9	30.6	6.6	2	5.6	17.4	6.1
Human contact	19.6	0.1	11.8	57	6.5	0.1	5.3	21.7	6.5	0.1	5.3	21.5	23.8	3.3	23.4	42.3	5.7	0	3.5	22.8	13.3	0	10.7	41.2	8	0.9	5.7	30	16.2	2.5	14.5	37.3	23.2	4.7	21.2	54.3	25.8	8.9	25.3	48.7	25.8	8.9	25.3	48.7	2.2	0	1.3	11.5	1.6
Water	7.3	0.7	5.6	30.3	10.9	1.3	9.5	33.5	11.1	1.3	9.6	34.7	13.5	1	10.6	38.8	41.5	10.8	40.9	77.3	40.6	8.6	41.7	74.3	30.3	5.5	30.9	48.6	24.2	6.6	24.9	40.3	16.5	3.7	13.6	43.2	16.1	4.3	15.3	34.5	16.1	4.3	15.3	34.5	11.2	0.8	9.4	33.2	13.6
Soil	6.2	0.5	4.9	17.7	4.5	0.3	3.7	14.3	4.5	0.3	3.6	14.6	1.1	0.2	0.9	3.3	1.9	0	0	13.7	3.3	0	0.9	15.6	5.1	0.4	4.7	12.4	8.9	2.2	8.7	15.6	0.5	0	0	7.4	1.6	0	1.1	7.7	1.6	0	1.1	7.7	0.5	0	0	5.4	0.2
Other	0.4	0	0	7	0.6	0	0	8.7	0.6	0	0	8.9	0.1	0	0	2.2	1.6	0	0.6	8.3	0.4	0	0	5.5	3	0.2	1.8	10	8.6	2	8.7	15.6	0.4	0	0	6.2	1.6	0.1	1.1	6.9	1.6	0.1	1.1	6.9	0.1	0	0	2.5	0.1
Specific Foods
Beef	16.3	2.2	14.3	48.6	26.8	4	26.2	52.1	26.5	3.7	25.4	52.7	9.8	1	5.7	34.2	14.3	0.7	11.9	45.8	6.4	0.1	4.3	33.9	22.3	5.5	20.7	45.3	10.2	1.8	9.5	22.8	8	0	0	61	8.9	0.4	7.8	32.7	8.9	0.4	7.8	32.7	17.7056	10.8914	16.8194	32.9032	18.5595
Small ruminants' meat	13.3	1.7	13.1	25.8	10.3	0.3	9.4	24.2	10.4	0.2	9.7	24.2	1.2	0	0.8	6.8	4.9	0.1	3.3	17.3	1.5	0	0.3	12.8	12.2	0.1	7.2	35	9.5	1	9.3	22.4	0.6	0	0	10.1	5.8	0	5.6	11.8	5.8	0	5.6	11.8	10.3577	4.67418	9.95065	21.731	11.2267
Pigs meat	4.1	0.1	3.1	15	1.8	0	1.1	11.4	1.9	0	1.1	12.1	14	3.2	10.7	34.3	6.5	0.1	5.7	19.1	5.4	0.1	4.4	17.6	7	0.4	2.8	38.3	9	1	6.8	23.1	5.1	0	0	43.5	8.7	0.2	7.9	26	8.7	0.2	7.9	26	0	0	0	0	0
Poultry Meat	9	0.9	6.2	38.6	24.9	8.4	24.1	44.2	24.5	7.7	23.7	44.5	6.7	0.8	4.2	20.9	6.4	0.1	5.7	18	5.8	0.1	5.3	17	11.3	0.1	9.8	39.1	12.4	1.2	12.6	27.5	8.7	0	0	79.4	15.6	0	14.6	42.4	15.6	0	14.6	42.4	7.80197	2.50579	6.15858	21.2672	6.98429
Game	6.3	0.7	4.9	21	11.3	0.9	10.9	24.4	11.2	0.9	10.7	24.5	1.3	0	0.9	5.8	2.4	0	1.1	9.9	0.8	0	0.2	7.3	1.4	0	0.7	6	2.7	0	2.6	7.3	0.6	0	0	9.8	3.1	0	2.8	9.6	3.1	0	2.8	9.6	1.22926	5.3259e-09	0.846037	8.87784	1.18091
Dairy	5.6	0.2	4.2	17.2	2	0	1.3	11.8	2.6	0	1.3	20.6	3.4	0.4	2.4	20.3	9	0.1	7.1	31.3	8	0.1	6.1	28.9	6.9	0.3	6.1	18.4	5.7	0.9	4.5	14.4	5	0	0	43.2	6.5	0.2	5.7	24.3	6.5	0.2	5.7	24.3	12.1177	7.20107	11.0089	29.1489	12.7409
Eggs	0.2	0	0	3.7	0.3	0	0	5.6	0.5	0	0	7.4	0.1	0	0	1.2	0	0	0	0	0	0	0	0	1.9	0	0	7	0.8	0	0	4.5	0.2	0	0	3.6	0.3	0	0	5	0.3	0	0	5	2.61806e-05	4.97484e-09	1.03723e-06	0.000102084	2.67184e-05
Vegetables	34.9	8.8	36.4	53.6	18	2.6	18	34.8	17.9	2.8	18	34.1	24.5	3.2	24.1	47.6	25.7	1.5	24.5	62.8	41.2	3.1	43.7	73.5	15.3	1.7	15	32.7	14.3	2.1	12.4	33.7	29.5	0.8	29.6	64.1	24.9	8.4	24.8	43.3	24.9	8.4	24.8	43.3	36.9129	20.4531	38.8107	44.3633	39.229
Fruits and nuts	8.7	0.1	4.3	44.1	2.8	0	2.4	10.3	2.7	0	2.3	9.7	13.5	1.9	10.2	34.1	17.4	0.3	14.6	50	19.7	0.3	19.7	49.8	6.6	0.3	6.1	17.6	7.3	1.3	4.9	21.7	19.7	0.7	15.7	51	7.3	1.7	5.9	30.9	7.3	1.7	5.9	30.9	4.8528	0.243588	4.87437	8.43332	3.75363
Grains and beans	0.3	0	0	5.9	0.4	0	0	7	0.4	0	0	6.9	4.4	0	3.6	21.4	0.8	0	0	13.7	1.3	0	0	14.7	2.9	0	1.5	13.1	8.3	1	7.7	19.2	13.1	0.1	7	46.9	8.3	1.4	7.6	25	8.3	1.4	7.6	25	2.96727	0.0240883	2.86154	7.34226	2.2741
Oils and sugar	0.2	0	0	3.6	0.3	0	0	4.4	0.3	0	0	4.3	0.2	0	0	1.6	0	0	0	0.1	0	0	0	0.1	0.5	0	0	5	2	0	1.2	7.3	0.3	0	0	4.5	2.9	0	2.8	6.3	2.9	0	2.8	6.3	2.52963	3.25359e-07	2.75134	4.21346	1.38491
Finfish	0.8	0	0	9	0.6	0	0	8.7	0.6	0	0	8.7	1.1	0	0.7	6.7	3.9	0	2.2	14.9	4.4	0	3.3	14	6.8	0.3	5	19.5	9.3	2	8.4	19.5	4.5	0	2.7	15.1	2.3	0.4	1.9	8.8	2.3	0.4	1.9	8.8	1.32937	5.13392e-09	1.06929	6.16749	0.976705
Shellfish	0.3	0	0	5.5	0.4	0	0	6.6	0.5	0	0	7.2	19.9	0.1	20.6	42.4	4.8	0.1	2.1	19.3	4.3	0.1	2.4	16.5	4.6	0.4	4.3	11.5	6.5	0	6.7	15	4.5	0	2.8	15.1	4.1	0.7	3.8	10.6	4.1	0.7	3.8	10.6	1.09206	6.20282e-09	0.9635	4.08009	0.716211
Seaweed	0.1	0	0	1.3	0.1	0	0	2.2	0.1	0	0	2.1	0	0	0	0.4	4	0	1.4	19.2	1.3	0	0	14.5	0.4	0	0	4	2	0	1.8	5.7	0.3	0	0	4.7	1.3	0	1	6.3	1.3	0	1	6.3	1.10369	5.40227e-09	0.85079	6.19257	0.973146
[truncated: 19 more columns]

## Sheet: Table S7. STEC
	African Region												Region of the Americas												South-East Asia Region								European Region												Eastern Mediterranean Region
	AFRAB				AFRC				AFRD				AMRA				AMRB				AMRC				SEARB				SEARC				EURA				EURB				EURC				EMRA				EMRBC
Transmission pathway	Mean	Lower	Median	Upper	Mean	Lower	Median	Upper	Mean	Lower	Median	Upper	Mean	Lower	Median	Upper	Mean	Lower	Median	Upper	Mean	Lower	Median	Upper	Mean	Lower	Median	Upper	Mean	Lower	Median	Upper	Mean	Lower	Median	Upper	Mean	Lower	Median	Upper	Mean	Lower	Median	Upper	Mean	Lower	Median	Upper	Mean
Food	52	33.6	52.3	69.8	52	33.6	52.3	69.8	56.7	28.6	58	77.6	59.2	33.2	59.9	80.6	62.4	29.4	63.3	89.1	61.2	34.5	61.3	86.2	42.5	12.1	42.2	75.1	56.6	34.1	56.6	79.1	40	4.5	37.9	81.9	39.6	4	38.4	81	39.6	4	38.2	81.7	72	54.8	71.7	88.8	72.8
Contact with Animals (Domestic or Wild)	27.7	10.6	28	41.3	27.7	10.6	28	41.3	17.2	1.8	16.8	37	17.1	1.2	16.6	40	8	0.6	6	22.9	8.2	0.5	6.2	22.3	10.5	0.5	9	31.8	11.3	0.5	9.8	31.5	11.9	0.1	7.2	49.9	11.7	0.1	6.8	48.2	10.8	0.1	6.3	42.8	8.4	2.2	7.7	17.8	8.9
Human contact	9.5	1.8	9.2	22.6	9.5	1.8	9.2	22.6	8.6	1.4	6.6	29	12.8	0.8	11.9	33.8	13.7	0.5	8.7	41.8	13	0.5	10.2	37.8	21.3	1.8	19.6	48.3	11.1	0.5	9.9	27.4	26.6	2.3	24.2	60.6	28.4	1.8	24.2	70.2	29.1	2	25.5	71.1	0.6	0	0	10.6	1
Water	7.1	1.1	6.6	21	7.1	1.1	6.6	21	9.2	1.6	7.8	26.7	8.4	0.6	6.2	29.6	15	0.6	13.5	37.8	15.8	0.6	14.8	36.7	23.6	1.2	23.3	49.8	15.3	0.6	14.8	32.9	18.3	1.2	14.5	50.7	17.4	1.1	13.1	53.7	17.4	1	13.2	53.1	18.2	4.9	20	31.5	16.6
Soil	3.1	0.6	2.9	7.4	3.1	0.6	2.9	7.4	4.9	0.7	3.9	17.1	2.2	0	0.9	13.6	0.7	0	0.1	6.7	1.6	0	0.3	11.9	0.6	0	0	9.9	5.4	0.5	4.8	16	2.9	0.1	1.6	12.3	2.7	0.1	1.6	12.1	2.8	0.1	1.6	12.4	0.6	0	0	6.1	0.5
Other	0.4	0	0	5.5	0.4	0	0	5.5	3.4	0.6	2.8	9.3	0.3	0	0	4.7	0.2	0	0	4.6	0.2	0	0	4.4	1.4	0	0.5	7.2	0.4	0	0	7.6	0.3	0	0	4.7	0.3	0	0	4.2	0.3	0	0	4.6	0.2	0	0	3.5	0.2
Specific Foods
Beef	40.8	20.4	40.5	61.6	40.8	20.4	40.5	61.6	15	2.4	12.2	42.1	42.6	15.4	43	70	53.2	20.9	55.2	76.2	54.7	23.5	56.1	78.5	25.4	4.2	24.2	55	50	18.9	51.1	76.8	43.4	15.7	43.6	70	40.1	12.7	39.6	67.8	41.2	13.4	41.3	69.2	25.4804	13.3009	24.7242	45.7983	26.184
Small ruminants' meat	17.5	4.2	17.6	29.8	17.5	4.2	17.6	29.8	7.7	1.3	6	23.5	1	0	0	13.4	2.2	0	1.1	12	2.1	0	1.1	14.1	6.5	0.2	4.9	19.5	1.9	0	1	14.1	6	0.1	2.4	30.3	6.4	0.1	3.1	32.5	6.6	0.1	3.3	32.2	13.2215	5.74823	12.8508	22.6896	13.6448
Pigs meat	5.1	0.6	4.6	13.3	5.1	0.6	4.6	13.3	10.7	2.2	10.2	23.8	3.1	0.1	2.5	10.3	5.1	0	4.7	14.9	3.7	0.1	2.7	15	10.8	0.6	9	27.8	2.8	0	1.9	15.5	3.9	0	2	20.4	4.5	0	2.4	22	4.6	0	2.5	23.2	0	0	0	0	0
Poultry Meat	2	0	0	22.9	2	0	0	22.9	9.8	2.1	7.8	30.7	2	0	0.7	13.4	5	0.1	4.7	12.9	3.8	0	3.1	13.3	8.9	0.4	7.4	23.2	3.4	0	2.6	18.6	2	0	0.4	18.5	2.4	0	0.5	21.5	2.4	0	0.5	20.5	9.6978	2.01357	8.53996	21.07	6.6752
Game	5.1	0.5	4.8	11.6	5.1	0.5	4.8	11.6	5.5	0.4	4.1	20.6	2.1	0	1.5	7.1	1.4	0	0.8	4.8	0.8	0	0.3	5.2	6.4	0	4.4	21.5	1	0	0.1	13.3	3.8	0.1	2.3	17.8	3.9	0.1	2.3	18.8	4	0.1	2.5	19.1	0.396434	6.86005e-09	3.4351e-06	3.47946	0.287605
Dairy	24.4	7.3	25.1	39.9	24.4	7.3	25.1	39.9	16.5	3.5	15.6	33.9	13.7	0.9	12.3	35.3	10.4	0.6	9.8	25.5	10.7	0.6	10	26.4	14.7	0.9	13.2	35.5	13.6	0.5	13	32	14.7	0.8	13.2	38.4	15.9	1	14.1	41.3	16.5	1.1	14.7	42	16.932	7.6642	16.5227	29.0709	14.838
Eggs	0.3	0	0	5.4	0.3	0	0	5.4	0.3	0	0	5.6	0.1	0	0	1.6	0	0	0	0	0	0	0	0	0.2	0	0	3.2	0.3	0	0	4.9	0	0	0	0	0	0	0	0	0	0	0	0	0.10132	6.16112e-09	2.30617e-06	2.04965	0.102644
Vegetables	2.2	0	0	27.1	2.2	0	0	27.1	16	1.5	13.1	40.9	22.1	1.4	19.7	52.9	14	0.6	12.3	34.3	14.8	0.6	13.1	36.9	11	0.5	9.4	29.1	16.2	0.5	14.8	40.5	15.2	1	13.7	42	14.5	1.3	12	43.7	14.7	1.4	12.2	43.8	19.8928	3.28235	11.1034	43.1899	23.8344
Fruits and nuts	1.3	0	0	16.9	1.3	0	0	16.9	9.2	0.9	6.3	29.5	8.6	0.8	7.4	23.1	6.3	0	5.3	17.4	7.1	0.1	5.1	22.1	7.4	0.3	6	19	8.1	0	4.7	27.4	5.2	0.1	4	16	5.3	0.2	4	17	5.1	0.2	4.2	14.3	5.92107	1.65573	5.48965	12.9174	6.18994
Grains and beans	0.5	0	0	6.1	0.5	0	0	6.1	3.8	0.2	3.2	9.9	2.5	0	0.6	23.5	0.3	0	0.1	1	0.8	0	0.4	5	1.3	0	0.6	6.5	1.2	0	0.9	5.7	4.1	0	1.1	25.5	4.7	0.1	1.6	27.5	2.6	0	0.8	15.6	2.84738	0.245206	2.61268	6.44194	3.05444
Oils and sugar	0.2	0	0	3.4	0.2	0	0	3.4	2.3	0.1	1.7	7.8	0.2	0	0	3.1	0	0	0	0	0	0	0	0	0.1	0	0	2.7	0.2	0	0	4.5	0.1	0	0	2.1	0.2	0	0	3	0.2	0	0	2.7	0.435875	7.14652e-09	2.87387e-06	3.80583	0.35934
Finfish	0.3	0	0	3.8	0.3	0	0	3.8	1.6	0	0.9	7.9	1	0	0.4	8.2	0.6	0	0.1	7.9	0.6	0	0.1	7.1	3	0	1.6	11.3	0.5	0	0.1	4.9	0.3	0	0	5.1	0.3	0	0	5.2	0.3	0	0	4.8	2.68127	0.110242	2.13591	10.0659	2.56613
Shellfish	0.3	0	0	4.1	0.3	0	0	4.1	1.2	0	0.6	7.9	1	0	0.4	7.8	1.3	0	0.7	7.8	0.9	0	0.3	7.4	3.5	0	2.1	15	0.5	0	0.1	4.8	1.2	0	0.6	6.2	1.4	0	0.6	8.1	1.5	0	0.7	8.7	2.3463	0.0598788	1.93848	7.07073	2.21657
Seaweed	0.1	0	0	2.4	0.1	0	0	2.4	0.4	0	0	5.6	0	0	0	0.6	0.2	0	0	0.9	0.1	0	0	0.8	0.8	0	0.4	3.6	0.3	0	0	4.2	0.3	0	0	4.4	0.4	0	0	5.1	0.4	0	0	4.7	0.0458849	5.96591e-09	1.52166e-06	0.906396	0.0469974
[truncated: 19 more columns]

## Sheet: Table 8. NTS
	African Region												Region of the Americas												South-East Asia Region								European Region												Eastern Mediterranean Region
	AFRAB				AFRC				AFRD				AMRA				AMRB				AMRC				SEARB				SEARC				EURA				EURB				EURC				EMRA				EMRBC
Transmission pathway	Mean	Lower	Median	Upper	Mean	Lower	Median	Upper	Mean	Lower	Median	Upper	Mean	Lower	Median	Upper	Mean	Lower	Median	Upper	Mean	Lower	Median	Upper	Mean	Lower	Median	Upper	Mean	Lower	Median	Upper	Mean	Lower	Median	Upper	Mean	Lower	Median	Upper	Mean	Lower	Median	Upper	Mean	Lower	Median	Upper	Mean
Food	70.1	49	70.5	88.4	65.3	44.6	65.8	82.5	65.5	45	66.1	82.4	66.9	44.2	67.6	86.7	65.7	39.5	66.9	85.4	65.6	39.4	66.7	86.1	64.8	45.9	65.1	82.8	68.1	45	68.2	88.8	73.8	52.3	74.8	89.4	62	48.9	61.6	77.3	63.7	48.6	63.6	79.7	60.6	44.3	60.8	76.7	58.6
Contact with Animals (Domestic or Wild)	13.8	1.9	14.1	25.3	13.9	2.6	14	26	14.1	2.7	14.1	26.3	13.5	0.3	13.1	30.8	11.8	0.7	11.2	28.7	12.2	0.7	11.4	29.8	13.7	2.2	13.7	26.4	11.3	0	11.7	28.1	11.1	1.8	10.7	23.3	14.8	3.9	14.7	27	14.4	3.9	14.3	26.8	17.6	4.5	17.6	29.6	18.7
Human contact	6	0	4	19.2	9.5	0.5	9.4	20.2	9.8	0.5	9.4	24	7.3	0.6	5.1	25.1	9.7	0.6	9.6	23.5	9.4	0.6	8.8	24.7	9.7	0.5	9.2	23	9.1	0.3	8.7	22.2	9.6	0.7	8.6	27.4	12.9	1.4	13.5	20.6	11.9	1	12.6	20.4	10.7	2.5	10.1	19.9	11.1
Water	7.5	0.6	5.5	30.9	7.1	0.5	5.1	29.6	7	0.5	5	28.2	9.7	0.9	8.3	26.6	10.1	0.6	9.1	28.2	10.4	0.6	9	29.4	7.8	0.6	5.8	27	6.9	0.6	5.4	21.2	3.3	0	1.7	20.3	7	0.6	5.6	19	6.7	0.5	5.3	18.7	9.1	1	8.5	19	9.8
Soil	2.2	0	1.1	12.8	2.2	0	1.1	13.8	1.9	0	1.1	6.6	2.2	0	0.7	15.2	2.5	0.1	1.2	14.3	2.2	0	1.1	14.5	2.3	0.1	1.3	12.3	2.4	0	1	17.3	1.9	0	0.9	11.4	1.8	0.1	1.1	5	1.7	0	1	4.9	1.8	0	1.1	5.9	1.3
Other	0.4	0	0	6.9	2	0	1	9.2	1.8	0	1	5.7	0.4	0	0	6	0.2	0	0	3.8	0.2	0	0	3.7	1.7	0.1	1.1	4.9	2.2	0.1	1.1	12	0.3	0	0	5.3	1.6	0.1	1	4.9	1.6	0	0.9	4.8	0.2	0	0	2.9	0.6
Specific Foods
Beef	6.3	0.5	4.7	22.1	6.1	0.4	4.6	21.4	6.1	0.4	4.6	20.5	8.4	0.4	7.3	23.5	8.4	0.5	7.6	21.2	9.4	0.5	7.9	26.8	6.4	0.4	4.9	22.2	6.1	0.4	4.9	17.4	7.5	0.7	6.8	18.1	6.6	0.6	6.4	14.5	6.2	0.5	5.6	14.4	5.71696	8.24103e-09	5.28889	15.5499	8.56567
Small ruminants' meat	2	0	1	10.6	1.9	0	1	10.6	1.9	0	1	11.1	2.2	0	1.1	13.2	1.5	0	1	6.3	1.5	0.1	1	6.3	2.1	0	1.1	10.3	2	0	1	10.2	2.5	0	1.5	11.8	1.9	0.1	1.4	5.3	1.8	0	1.2	5.2	2.5887	7.04871e-09	1.89259	12.1782	3.44768
Pigs meat	16.9	3.1	16	35	17.7	2.5	17.4	35.1	17.6	3.3	17.1	35	9.9	0.4	8	30.9	12.4	0.6	10.7	31.6	12.9	0.6	10.7	33.8	17.6	2.6	16.8	37.2	18.2	2.3	17.9	35.7	22.5	3	21.8	43.4	23.8	8.3	23.1	42.3	24.8	8.8	24.1	43.4	0	0	0	0	0
Poultry Meat	26.7	10.7	26.3	45.2	26.1	10.7	25.6	44.5	26.1	9	25.8	44.4	28.6	6.9	28.1	53.5	24.6	3.7	25	45.7	24.6	3.1	24.7	47	25.5	7	25	45.1	27	8.4	26.7	46.6	21.8	3.9	21.2	42.8	24.6	7	25	39	23.1	5.4	23.5	38.1	37.0129	18.664	37.8972	51.7797	43.3272
Game	1.6	0	0.9	5.4	1.6	0	0.9	5.7	1.6	0	0.9	5.4	0.6	0	0	7.2	1.5	0.1	1	6.1	0.9	0	0.4	5.7	1.5	0	0.9	4.6	1.8	0	1	7.5	2	0	1.1	11.3	1.9	0.1	1.4	6.8	1.8	0	1.2	6.3	0.168508	5.3455e-05	0.00128168	3.11759	0.36287
Dairy	5.8	0.5	4.8	14.8	5.8	0.4	4.7	14.8	5.8	0.4	4.6	16.7	6.7	0.6	5.2	21.7	10.7	1.2	8.9	28.3	10.6	0.9	8.7	29.9	5.4	0.4	4.4	13.6	5.8	0.4	4.4	16.1	4.8	0.3	3.3	16.2	6.6	0.5	6.2	14.5	6	0.4	5.5	14	6.09697	7.32992e-09	5.32051	20.4164	7.16122
Eggs	22.3	3.4	22.2	42.1	21.6	3.1	21.5	41.3	21.9	3	22.2	41.1	16.5	1.4	15.6	38.6	22.4	3.6	22.7	43.3	18.9	1.1	18	43.4	20.9	2.6	20.7	41	18.5	1.8	17.6	40.6	24.3	4.3	23.5	47.1	14.7	1.6	10.2	40.4	17.2	1.8	14.8	41.4	21.2926	7.77753	20.8053	38.8877	16.8842
Vegetables	5.8	0.5	4.9	13.9	5.9	0.4	4.5	17.8	5.5	0.5	4.5	13.7	12.3	0.8	9.9	36.4	9.2	0.5	8.2	25.6	10	0.5	8.5	29.2	6.3	0.5	4.8	21	6	0.4	4.9	15.2	7.7	0.5	6	25.9	6.2	0.5	5.5	14.4	5.8	0.5	4.8	14.1	7.15386	0.992233	5.81885	17.5817	7.20427
Fruits and nuts	4.7	0	3.6	13.6	5.5	0.4	4.5	13.8	5.5	0.4	4.5	13.8	8.6	0.1	7.1	26.8	6.3	0.5	4.9	18.3	7.1	0.5	5.5	20.4	5.4	0.4	4.5	13.6	5.8	0.5	4.9	14.2	3.2	0.1	1.6	15.8	5.5	0.6	4.9	13.3	5.5	0.4	4.8	13.6	6.86211	1.02449	5.72155	15.1904	7.16144
Grains and beans	1.5	0	0.9	5.1	1.6	0	0.9	5	1.6	0	1	5	1.6	0	0.7	8.4	0.4	0	0	5.6	0.7	0	0	6	1.7	0	0.9	6.6	1.8	0.1	1.1	6.2	1.3	0	0.8	4.5	2	0	1.3	7.1	1.8	0	1.1	6.7	2.23207	0.0475294	1.31549	8.53224	2.44111
Oils and sugar	1.4	0	0.8	4.7	1.5	0	0.9	4.6	1.5	0	0.9	4.7	0.4	0	0	4.2	0.1	0	0	2.5	0.2	0	0	2.6	1.6	0	0.9	6.5	1.5	0	0.8	5.9	0.2	0	0	2.8	1.4	0	0.9	4.6	1.4	0	0.8	4.6	1.91481	0.0289018	1.39637	5.13327	0.464542
Finfish	1.6	0	1	5.3	1.6	0	0.9	5.4	1.6	0	0.9	5.2	1.8	0	1.2	7.1	0.6	0	0.1	5.4	0.9	0	0.3	6.9	2.1	0	1.1	10.3	1.8	0	1	6.7	0.6	0	0.2	4	1.4	0	0.9	4.6	1.4	0	0.8	4.5	3.8871	0.0842996	2.87189	13.7805	1.06893
Shellfish	1.6	0	1	5.4	1.7	0	0.9	6.1	1.6	0	0.9	5.5	1.8	0	1.1	9.5	1.7	0	1.1	6.4	2.2	0.1	1.4	8.4	1.9	0	1	9.4	2.1	0	1	13.1	1.5	0	1	7.1	1.9	0	1.1	6.3	1.8	0	1	6.1	3.88866	0.0884411	2.84713	13.9385	1.07093
Seaweed	1.6	0	1	5.1	1.5	0	0.9	4.6	1.6	0	0.9	5.6	0.5	0	0.1	3.2	0.2	0	0	2.7	0.3	0	0	3	1.6	0	0.9	6.5	1.7	0	1	6.2	0.2	0	0	2.9	1.5	0.1	1	4.6	1.5	0	0.9	4.6	1.18477	5.94264e-09	1.00859	4.222	0.839871
[truncated: 19 more columns]

## Sheet: Table 9. SHIG
	African Region												Region of the Americas												South-East Asia Region								European Region												Eastern Mediterranean Region
	AFRAB				AFRC				AFRD				AMRA				AMRB				AMRC				SEARB				SEARC				EURA				EURB				EURC				EMRA				EMRBC
Transmission pathway	Mean	Lower	Median	Upper	Mean	Lower	Median	Upper	Mean	Lower	Median	Upper	Mean	Lower	Median	Upper	Mean	Lower	Median	Upper	Mean	Lower	Median	Upper	Mean	Lower	Median	Upper	Mean	Lower	Median	Upper	Mean	Lower	Median	Upper	Mean	Lower	Median	Upper	Mean	Lower	Median	Upper	Mean	Lower	Median	Upper	Mean
Food	28.8	14.2	28.8	44.6	28.8	14.2	28.8	44.6	28.8	14.2	28.8	44.6	16.6	2.2	14.3	39	18	2.8	14.7	46.4	18.9	2.2	16.5	45.6	19	1.2	15.5	55.2	27	1.3	25.7	57.5	15.3	4.5	14.3	36.4	15.3	4.5	14.3	36.4	15.3	4.5	14.3	36.4	14	1.2	12.6	39.9	30.6
Contact with Animals (Domestic or Wild)	0	0	0	0	0	0	0	0	0	0	0	0	0	0	0	0	0	0	0	0	0	0	0	0	0	0	0	0	0	0	0	0	0	0	0	0	0	0	0	0	0	0	0	0	0	0	0	0	0
Human contact	14.5	3.5	8.3	45.7	14.5	3.5	8.3	45.7	14.5	3.5	8.3	45.7	69.9	47.2	70.6	88.2	68.6	37.9	70.1	88.8	66.2	37.1	67.2	88.2	58	13.5	61.4	87.7	46.6	17.2	46.8	72.9	57.8	35.5	58.5	75.9	57.8	35.5	58.5	75.9	57.8	35.5	58.5	75.9	68.6	41.1	70	89.3	46.3
Water	52.3	18.9	55.9	67	52.3	18.9	55.9	67	52.3	18.9	55.9	67	10.7	1.3	9.6	27.6	11.4	1.1	9.9	32.6	13.2	1.3	11.4	35.5	20.1	1.8	17.1	54.8	24.8	1	24.5	53.8	25.2	7.3	24.7	44.5	25.2	7.3	24.7	44.5	25.2	7.3	24.7	44.5	15.3	2.1	13.6	39.7	22.3
Soil	2	0	0.5	10.4	2	0	0.5	10.4	2	0	0.5	10.4	1.3	0	0.5	12.3	1.3	0	0.4	12.9	1.1	0	0.2	12.7	1.2	0	0.1	13.1	1.2	0	0.3	11.3	0.8	0	0.2	7.3	0.8	0	0.2	7.3	0.8	0	0.2	7.3	0.9	0	0.1	11.1	0.7
Other	2.4	0	2.5	4.8	2.4	0	2.5	4.8	2.4	0	2.5	4.8	1.5	0	0	10.3	0.7	0	0	9.6	0.5	0	0	8.5	1.6	0	0	24.1	0.4	0	0	7.3	0.9	0	0.2	12.8	0.9	0	0.2	12.8	0.9	0	0.2	12.8	1.1	0	0	12.9	0.1
Specific Foods
Beef	15.8	5.2	15.1	30.1	15.8	5.2	15.1	30.1	15.8	5.2	15.1	30.1	5.7	0	3.7	24.5	9.9	0.8	8.3	28.5	8.4	0	6.1	30	3.8	0	0	28.9	8.3	0.1	7.2	23.9	0.8	0	0	11.2	0.8	0	0	11.2	0.8	0	0	11.2	2.8557	9.97266e-05	0.00710811	24.6178	12.2539
Small ruminants' meat	4.3	0	3.9	11.2	4.3	0	3.9	11.2	4.3	0	3.9	11.2	1.9	0	1	10.1	2.4	0	1.4	10.8	1.5	0	0.5	10.4	1.7	0	0.1	16.3	1.1	0	0.3	11.4	0.8	0	0	11.2	0.8	0	0	11.2	0.8	0	0	11.2	0.923871	9.87769e-05	0.00346176	9.02368	5.35337
Pigs meat	5.4	0.6	5	11.5	5.4	0.6	5	11.5	5.4	0.6	5	11.5	3.4	0	2.2	12.3	5.3	0.5	3.7	19.3	6	0	3.6	27	2.6	0	0	24.8	11.5	0	10.5	31.6	0.8	0	0	11.2	0.8	0	0	11.2	0.8	0	0	11.2	0	0	0	0	0
Poultry Meat	30.3	7	31.9	43	30.3	7	31.9	43	30.3	7	31.9	43	4.5	0	2.9	17.6	7	0.6	5.6	22.5	5.5	0	3.5	23.3	3.9	0	0	31.4	12	0.2	11	30.8	0.9	0	0	12.1	0.9	0	0	12.1	0.9	0	0	12.1	2.73052	0.000114838	0.0582191	22.9696	15.462
Game	4.3	0	4.4	11.2	4.3	0	4.4	11.2	4.3	0	4.4	11.2	1.9	0	0.7	11.4	2.5	0	1.2	12.5	1.7	0	0.5	12.4	1.2	0	0	12.9	0.5	0	0.1	6.3	0.9	0	0	11.3	0.9	0	0	11.3	0.9	0	0	11.3	0.984386	9.53213e-05	0.00331923	10.3569	2.40844
Dairy	13.9	3.5	13.9	23.5	13.9	3.5	13.9	23.5	13.9	3.5	13.9	23.5	7.5	0	4.4	30.1	14.4	1.4	13.3	35.6	11.1	0	8.3	37.6	6.6	0	0	38.4	13	0.8	12.4	28.1	1.3	0	0	17.8	1.3	0	0	17.8	1.3	0	0	17.8	4.51965	0.000100136	0.00289822	31.4771	14.2805
Eggs	0	0	0	0	0	0	0	0	0	0	0	0	0	0	0	0	0	0	0	0	0	0	0	0	0	0	0	0	0	0	0	0	0	0	0	0	0	0	0	0	0	0	0	0	2.20122e-05	4.91992e-09	1.19015e-06	0.000100498	2.5572e-05
Vegetables	13.1	3.3	10.9	33.6	13.1	3.3	10.9	33.6	13.1	3.3	10.9	33.6	30.3	5	29.5	59	21.3	1.3	20.5	47.6	26.5	1.5	25.6	59.3	42	4.2	41.1	84.1	19.6	0.8	18.7	44.9	82	53.2	84.9	95.1	82	53.2	84.9	95.1	82	53.2	84.9	95.1	55.4167	16.4392	55.773	90.7261	19.724
Fruits and nuts	5.3	0.7	5.3	10.3	5.3	0.7	5.3	10.3	5.3	0.7	5.3	10.3	25	4	23.4	52.8	11.9	0.8	9.1	38.4	15.4	0.9	12.2	47.5	17.7	0.9	12.7	56.8	11.1	0.7	10.5	26.1	4.1	0.6	2.3	25.8	4.1	0.6	2.3	25.8	4.1	0.6	2.3	25.8	17.9612	0.939296	8.81736	56.9749	7.83893
Grains and beans	2.6	0	1.2	10.8	2.6	0	1.2	10.8	2.6	0	1.2	10.8	4.5	0	1.9	25.6	4.8	0.1	2.1	24.7	4.7	0	1.8	25.1	3	0	0.3	22.9	3.3	0	2.2	10.6	0.3	0	0	3.8	0.3	0	0	3.8	0.3	0	0	3.8	1.97695	8.51448e-05	0.00800803	20.7055	3.45103
Oils and sugar	1.6	0	1.1	6.7	1.6	0	1.1	6.7	1.6	0	1.1	6.7	2.2	0	0.5	15.3	0.8	0	0	12.8	0.7	0	0	10.9	0.7	0	0	10.8	0.2	0	0	3.3	0.2	0	0	2.3	0.2	0	0	2.3	0.2	0	0	2.3	1.04354	9.20435e-05	0.00298593	11.929	0.222474
Finfish	1.2	0	0.9	4.8	1.2	0	0.9	4.8	1.2	0	0.9	4.8	3.7	0	2.2	15.1	5.9	0.5	5.1	15.9	5.2	0	3.9	17.5	2.9	0	0.5	16.8	9.1	0.6	9	19.3	0.9	0.1	0.2	7.3	0.9	0.1	0.2	7.3	0.9	0.1	0.2	7.3	1.69025	0.0113776	0.331114	13.3403	5.90256
Shellfish	1.3	0	0.9	6.6	1.3	0	0.9	6.6	1.3	0	0.9	6.6	9.4	0.1	5.2	41.4	13.5	0.6	11.5	42.1	12.8	0.3	9.4	46.8	13.3	0.3	8.2	56.1	8.7	0.3	8.6	19.3	4.6	0.5	2.2	34	4.6	0.5	2.2	34	4.6	0.5	2.2	34	9.23791	0.147006	4.74718	45.9635	10.8029
Seaweed	1	0	0.9	4.3	1	0	0.9	4.3	1	0	0.9	4.3	0.1	0	0	2.7	0.3	0	0	5.3	0.5	0	0	6.1	0.6	0	0	6.5	1.5	0	1	5.5	2.5	0.3	2	7.7	2.5	0.3	2	7.7	2.5	0.3	2	7.7	0.659294	9.82473e-09	6.48662e-05	6.50972	2.2999
[truncated: 19 more columns]

[truncated: 19 more sheets: Table 10. VIBR, Table S11. CRYP, Table S12. CYCL, Table S13. ENTA, Table S14. GIAR, Table S15. HAV, Table S16. BRUC, Table S17. LIST, Table S18. zMTBC, Table S19. PARA, Table S20. TYPH, Table S21. TCRU, Table S22. EGRAN, Table S23. EMULTI, Table S24. ASC, Table S25. FASC, Table S26 TOXG, Table S27. CBOT, Table S28. PB]
