# Supplementary material
Source: Research Square preprint supplement (doi:10.21203/rs.3.rs-9449162/v1)
Supplement: Supplementary file 1 [file eedc98d6a918a43f660af730.docx]

**Supplementary Material**

Contents

[Supplementary Tables 3](#_Toc227231164)

[Supplementary Table 1. Classification of World Health Organization Members States according to WHO Regions and subregional clusters adopted for the WHO foodborne disease estimates 2026 edition. 3](#_Toc227231165)

[Supplementary Table 2. List of 42 hazards included in the World Health Organization foodborne disease estimates 2026 edition. 5](#_Toc227231166)

[Supplementary Table 3. Overview of blocked pathways (B) and foods for 21 diarrhoeal disease and invasive enteric disease and intoxication hazards included in the structure expert judgement for the World Health Organization attribution of foodborne hazards to transmission pathways and foods 6](#_Toc227231167)

[Supplementary Table 4. Overview of blocked pathways (B) and foods for seven parasitic hazards included in the structure expert judgement for the World Health Organization attribution of foodborne hazards to transmission pathways and foods 8](#_Toc227231168)

[Supplementary Table 5. Criteria for selection of experts for the structure expert judgement for the World Health Organization attribution of foodborne hazards to transmission pathways and foods 10](#_Toc227231169)

[Supplementary Table 6. Number of expert assessments per hazard and sub-region for the World Health Organization attribution of foodborne hazards to transmission pathways and foods 11](#_Toc227231170)

[Supplementary Figures 13](#_Toc227231171)

[Supplementary Figure S1. Attributions (median, 2.5th and 97.5th percentiles) to transmission pathways to foods for 29 hazards for the African Region. 13](#_Toc227231172)

[Supplementary Figure S2. Attributions (median, 2.5th and 97.5th percentiles) to transmission pathways to foods for 29 hazards for the Region of the Americas. 15](#_Toc227231173)

[Supplementary Figure S3. Attributions (median, 2.5th and 97.5th percentiles) to transmission pathways to foods for 29 hazards for the South-East Asia Region. 17](#_Toc227231174)

[Supplementary Figure 4. Detailed attributions (median, 2.5th and 97.5th percentiles) to transmission pathways to foods for 29 hazards for the European Region. 19](#_Toc227231175)

[Supplementary Figure S5. Attributions (median, 2.5th and 97.5th percentiles) to transmission pathways to foods for 29 hazards for the Eastern Mediterranean Region. 21](#_Toc227231176)

[Supplementary Figure S6. Attributions (median, 2.5th and 97.5th percentiles) to transmission pathways to foods for 29 hazards for the Western Pacific Region. 23](#_Toc227231177)

[Supplementary Figure 8. Estimated attribution proportion to main pathways (mean and 95% Confidence Interval) in FERG 2015 (Hald et al., 2016) and FERG 2026 for parasites 33](#_Toc227231178)

[Supplementary Figure 9. Estimated attribution proportion to main pathways in FERG 2015 (median and 95% Confidence Interval) (Hald et al., 2016) and FERG 2026 (mean and 95% Confidence Interval) for lead 35](#_Toc227231179)

[Supplementary Figures 10. Estimated attribution to food categories in FERG 2026 and estimated in previous source attribution studies (mean and 95% Confidence Intervals). 36](#_Toc227231180)

## Supplementary Tables

### Supplementary Table 1. Classification of World Health Organization Members States according to WHO Regions and subregional clusters adopted for the WHO foodborne disease estimates 2026 edition.

| **Region** | **Subregional cluster** | **Countries** |
| --- | --- | --- |
| AFR | AB | Botswana, Equatorial Guinea, Gabon, Mauritius, Namibia, Seychelles, South Africa |
| AFR | C | Algeria, Angola, Benin, Cameroon, Cabo Verde, Comoros, Congo, Côte d’Ivoire, Eswatini, Ghana, Guinea, Kenya, Lesotho, Mauritania, Nigeria, São Tomé and Príncipe, Senegal, United Republic of Tanzania, Zambia, Zimbabwe |
| AFR | D | Burkina Faso, Burundi, Central African Republic, Chad, Democratic Republic of Congo, Eritrea, Ethiopia, Gambia, Guinea-Bissau, Liberia, Madagascar, Malawi, Mali, Mozambique, Niger, Rwanda, Sierra Leone, South Sudan, Togo, Uganda |
| AMR | A | Antigua and Barbuda, Bahamas, Barbados, Canada, Chile, Guyana, Panama, Saint Kitts and Nevis, Trinidad and Tobago, United States of America, Uruguay |
| AMR | B | Argentina, Belize, Brazil, Colombia, Costa Rica, Cuba, Dominica, Dominican Republic, Ecuador, El Salvador, Grenada, Guatemala, Jamaica, Mexico, Paraguay, Peru, Saint Lucia, Saint Vincent and the Grenadines, Suriname |
| AMR | C | Bolivia (Plurinational State of), Haiti, Honduras, Nicaragua, Venezuela (Bolivarian Republic of) |
| SEAR | B | Indonesia, Maldives, Thailand |
| SEAR | CD | Bangladesh, Bhutan, India, Myanmar, Nepal, Democratic People's Republic of Korea, Sri Lanka, Timor-Leste |
| EUR | A | Andorra, Austria, Belgium, Croatia, Cyprus, Czechia, Denmark, Estonia, Finland, France, Germany, Greece, Hungary, Iceland, Ireland, Israel, Italy, Latvia, Lithuania, Luxembourg, Malta, Monaco, Netherlands (Kingdom of the), Norway, Poland, Portugal, Romania, San Marino, Slovakia, Slovenia, Spain, Sweden, Switzerland, United Kingdom of Great Britain and Northern Ireland |
| EUR | B | Albania, Armenia, Azerbaijan, Belarus, Bosnia and Herzegovina, Bulgaria, Georgia, Kazakhstan, Montenegro, North Macedonia, Republic of Moldova, Russian Federation, Serbia, Türkiye, Turkmenistan |
| EUR | C | Kyrgyzstan, Tajikistan, Ukraine, Uzbekistan |
| EMR | A | Bahrain, Kuwait, Oman, Qatar, Saudi Arabia, United Arab Emirates |
| EMR | BC | Djibouti, Egypt, Iran (Islamic Republic of), Iraq, Jordan, Lebanon, Libya, Morocco, Pakistan, Tunisia |
| EMR | D | Afghanistan, Somalia, Sudan, Syrian Arab Republic, Yemen |
| WPR | A | Australia, Brunei Darussalam, Cook Islands, Japan, Nauru, New Zealand, Niue, Singapore, Republic of Korea |
| B | China, Fiji, Malaysia, Marshall Islands, Palau, Tonga, Tuvalu |
| C | Cambodia, Kiribati, Lao People's Democratic Republic, Micronesia (Federated States of), Mongolia, Papua New Guinea, Philippines, Samoa, Solomon Islands, Vanuatu, Viet Nam |

AFR=African Region; AMR=Region of the Americas; SEAR=South-East Asia Region; EUR=European Region; EMR=Eastern Mediterranean Region; WPR=Western Pacific Region.

### Supplementary Table 2. List of 42 hazards included in the World Health Organization foodborne disease estimates 2026 edition.

| **Diarrhoeal disease hazards** | **Invasive enteric disease**  **and intoxication hazards** | **Invasive parasitic disease hazards** | **Chemical hazards** |
| --- | --- | --- | --- |
| **Viruses**  1. Norovirus  2 Rotavirus *  **Bacteria**  3. *Campylobacter jejuni/ coli*  4. *Enteroaggregative E. coli* *  5. Enteropathogenic *E. coli*  6. Enterotoxigenic *E. coli*  7. Shiga-toxin producing *E. coli*  8. Non-typhoidal *Salmonella enterica* (diarrhoeal) ‡  9. *Shigella* spp.  10. *Vibrio cholerae*  **Protozoa**  11. *Cryptosporidium* spp.  12. *Cyclospora cayetanensis* *  13. *Entamoeba histolytica*  14. *Giardia duodenalis* | **Viruses**  15. Hepatitis A virus  **Bacteria**  16. *Brucella* spp.  17. *Listeria monocytogenes*  18. *Mycobacterium bovis/ caprae/ orygis*  8. Non-typhoidal *Salmonella enterica* (invasive) ‡  19. *Salmonella* Paratyphi  20. *Salmonella* Typhi  21. *Clostridium botulinum* | **Protozoa**  22.*Toxoplasma gondii*  23. *Trypanosoma cruzi* *  **Cestodes**  24. *Echinococcus granulosus*  25. *Echinococcus multilocularis*  26. *Taenia solium*  **Nematodes**  27. *Ascaris* spp.  28. *Trichinella* spp.  **Trematodes**  29. *Clonorchis sinensis*  30. *Fasciola* spp. & *Fasciolopsis buski*  31. Minute intestinal flukes §  32. *Opisthorchis viverrini/ Opisthorchis felineus*  33. *Paragonimus* spp. | **Organic pollutants**  34. Dioxin  **Toxins and allergens**  35. Aflatoxin B1  36. Aflatoxin M1 *  37 . Cassava cyanide  38. Peanut allergens  **Metals**  39. Inorganic arsenic *  40. Cadmium *  41. Lead *  42. Methylmercury * |

* Hazard estimated for the first time

† This hazard includes other thermotolerant species.

‡ Salmonellosis and invasive samonellosis are counted as a single hazard causing two diseases.

§ Includes *Echinostoma* spp., *Heterophyes* spp., *Metagonimus* spp. and other foodborne intestinal trematode species.

### Supplementary Table 3. Overview of blocked pathways (B) and foods for 21 diarrhoeal disease and invasive enteric disease and intoxication hazards included in the structure expert judgement for the World Health Organization attribution of foodborne hazards to transmission pathways and foods

|  | *Brucella spp.* | *Campylobacter spp.* | *Clostridium botulinum* | *Cryptosporidium spp.* | *Cyclospora* | *Enteropathogenic E.coli (EPEC)* | *Enterotoxigenic  E.coli (ETEC)* | *Enteroaggregative  E.coli (EAEC)* | *Giardia spp.* | *Hepatitis A virus* | *Listeria monocytogenes* | *Mycobacterium  bovis/caprae/orygis* | *Norovirus* | *Rotavirus* | *Salmonella enterica Typhi* | *Salmonella enterica  Paratyphi A* | *Non-typhoidal  Salmonella enterica* | *Shiga toxin-producing  E.coli (STEC)* | *Shigella spp.* | *Vibrio cholerae* | *Entamoeba histolytica* |
| --- | --- | --- | --- | --- | --- | --- | --- | --- | --- | --- | --- | --- | --- | --- | --- | --- | --- | --- | --- | --- | --- |
| **Major pathways** |  |  |  |  |  |  |  |  |  |  |  |  |  |  |  |  |  |  |  |  |  |
| Food |  |  |  |  |  |  |  |  |  |  |  |  |  |  |  |  |  |  |  |  |  |
| Contact with animals (domestic or wild) |  |  | B |  |  |  |  |  |  |  |  |  | B | B | B | B |  |  | B |  | B |
| Water |  |  | B |  |  |  |  |  |  |  |  |  |  |  |  |  |  |  |  |  |  |
| Soil |  |  | B |  |  |  |  |  |  |  |  |  |  |  |  |  |  |  |  |  |  |
| Human contact | B |  | B |  |  |  |  |  |  |  | B |  |  |  |  |  |  |  |  |  |  |
| Other (e.g. airborne/pollution, occupational) |  |  | B |  |  |  |  |  |  |  | B |  |  |  |  |  |  |  |  |  |  |
| **Foods categories** | | | | | | | | | | | | | | | | | | | | | |
| Beef |  |  |  |  |  |  |  |  |  |  |  | B |  |  |  |  |  |  |  |  |  |
| Dairy |  |  |  |  |  |  |  |  |  |  |  |  |  |  |  |  |  |  |  |  |  |
| Small ruminants |  |  |  |  |  |  |  |  |  |  |  | B |  |  |  |  |  |  |  |  |  |
| Pigs' meat* |  |  |  |  |  |  |  |  |  |  |  | B |  |  |  |  |  |  |  |  |  |
| Eggs | B | B | B | B | B | B | B | B | B | B |  | B | B | B | B | B |  | B | B | B | B |
| Poultry meat | B |  |  |  |  |  |  |  |  |  |  | B |  |  |  |  |  |  |  |  |  |
| Game |  |  |  |  |  |  |  |  |  |  |  | B |  |  |  |  |  |  |  |  |  |
| Fruits and nuts | B |  |  |  |  |  |  |  |  |  |  | B |  |  |  |  |  |  |  |  |  |
| Vegetables | B |  |  |  |  |  |  |  |  |  |  | B |  |  |  |  |  |  |  |  |  |
| Grains and beans | B |  |  | B | B |  |  |  | B | B |  | B | B | B | B | B |  |  |  | B | B |
| Oils and sugar | B |  | B | B | B |  |  |  | B | B |  | B | B | B | B | B |  |  |  | B | B |
| Finfish | B |  |  |  | B |  |  |  |  |  |  | B |  |  |  |  |  |  |  |  |  |
| Shellfish | B |  |  |  |  |  |  |  |  |  |  | B |  |  |  |  |  |  |  |  |  |
| Seaweed | B |  |  |  |  |  |  |  |  |  |  | B |  |  |  |  |  |  |  |  |  |

*Pig’s meat was excluded from the source attribution for all hazards in the Eastern Mediterranean sub-regions due to absent or negligible pork consumption in the region (Source: [Meat: OECD-FAO Agricultural Outlook 2018-2027 | OECD](https://eur01.safelinks.protection.outlook.com/?url=https%3A%2F%2Fwww.oecd.org%2Fen%2Fpublications%2Foecd-fao-agricultural-outlook-2018-2027_agr_outlook-2018-en%2Ffull-report%2Fcomponent-10.html%23section-d1e13317&data=05%7C02%7Csmpi%40food.dtu.dk%7Ce40df00b92cb43ca319108de8f7412e4%7Cf251f123c9ce448e927734bb285911d9%7C0%7C0%7C639105925907683202%7CUnknown%7CTWFpbGZsb3d8eyJFbXB0eU1hcGkiOnRydWUsIlYiOiIwLjAuMDAwMCIsIlAiOiJXaW4zMiIsIkFOIjoiTWFpbCIsIldUIjoyfQ%3D%3D%7C0%7C%7C%7C&sdata=epZhRZE1VmyGRW%2Fp2ALDyfa32NVmeDR1ARkAsByFVuo%3D&reserved=0))

### Supplementary Table 4. Overview of blocked pathways (B) and foods for seven parasitic hazards included in the structure expert judgement for the World Health Organization attribution of foodborne hazards to transmission pathways and foods

|  | *Toxoplama gondii* | *Fasciola & Fasciolopsis* | *Echinococcus multilocularis* | *Echinococcus granulosus* | *Trichinella spp.* | *Trypanosoma cruzi* | *Ascaris lumbricoides* |
| --- | --- | --- | --- | --- | --- | --- | --- |
| **Major pathways** |  |  |  |  |  |  |  |
| Food |  |  |  |  |  |  |  |
| Contact with animals (domestic or wild) |  | B |  |  | B |  | B |
| Water |  |  |  |  | B | B | B |
| Soil |  | B |  |  | B | B |  |
| Human contact |  | B | B | B | B |  | B |
| Vector borne | B | B | B | B | B |  | B |
| Other (e.g. airborne/pollution, occupational) | B | B | B | B | B |  | B |
| **Specific foods** | B | B | B | B | B | B | B |
| Beef |  | B | B | B | B | B | B |
| Dairy |  | B | B | B | B | B | B |
| Small ruminants |  | B | B | B | B | B | B |
| Pigs' Meat* |  | B | B | B |  | B | B |
| Eggs | B | B | B | B | B | B | B |
| Poultry Meat |  | B | B | B | B | B | B |
| Game |  | B | B | B |  |  | B |
| Fruits and Nuts |  | B |  |  | B |  |  |
| Vegetables |  |  |  |  | B |  |  |
| Grains and Beans | B | B | B | B | B | B | B |
| Oils and sugar | B | B | B | B | B | B | B |
| Finfish | B | B | B | B | B | B | B |
| Shellfish |  | B | B | B | B | B | B |
| Seaweed | B | B | B | B | B | B | B |

*Pig’s meat was excluded from the source attribution for all hazards in the Eastern Mediterranean sub-regions due to absent or negligible pork consumption in the region (Source: [Meat: OECD-FAO Agricultural Outlook 2018-2027 | OECD](https://eur01.safelinks.protection.outlook.com/?url=https%3A%2F%2Fwww.oecd.org%2Fen%2Fpublications%2Foecd-fao-agricultural-outlook-2018-2027_agr_outlook-2018-en%2Ffull-report%2Fcomponent-10.html%23section-d1e13317&data=05%7C02%7Csmpi%40food.dtu.dk%7Ce40df00b92cb43ca319108de8f7412e4%7Cf251f123c9ce448e927734bb285911d9%7C0%7C0%7C639105925907683202%7CUnknown%7CTWFpbGZsb3d8eyJFbXB0eU1hcGkiOnRydWUsIlYiOiIwLjAuMDAwMCIsIlAiOiJXaW4zMiIsIkFOIjoiTWFpbCIsIldUIjoyfQ%3D%3D%7C0%7C%7C%7C&sdata=epZhRZE1VmyGRW%2Fp2ALDyfa32NVmeDR1ARkAsByFVuo%3D&reserved=0))

##

### Supplementary Table 5. Criteria for selection of experts for the structure expert judgement for the World Health Organization attribution of foodborne hazards to transmission pathways and foods

| **Criteria** | **Academic** | **Governmental** |
| --- | --- | --- |
| Relevance of university degree* | None (2 points); BSc or equivalent (4 points); MSc or equivalent (6 points); PhD/doctoral or equivalent (8 points); postdoctoral or equivalent (10 points) | None (2 points); BSc or equivalent (4 points); MSc or equivalent (6 points); PhD/doctoral or equivalent (8 points); postdoctoral or equivalent (10 points) |
| Years of experience on call topic | 1-3 (2 points); 3-6 (4 points); 6-10 (6 points); 10-15 (8 points); >15 (10 points) | 1-3 (2 points); 3-6 (4 points); 6-10 (6 points); 10-15 (8 points); >15 (10 points) |
| Relevant publications of reports on hazard(s)/region(s) | <10 (2 points); 11-20 (4 points); 21-30 (6 points); 31-40 (8 points); >40 (10 points) | Not applicable |
| Level of seniority (position held) | Not applicable | Trainee/intern (2 points); junior/assistant (4 points); officer/investigator (6 points); senior officer/PI (8 points); director/head of lab/service (10 points) |

*We did not consider candidates with no university degree

### Supplementary Table 6. Number of expert assessments per hazard and sub-region for the World Health Organization attribution of foodborne hazards to transmission pathways and foods

|  | **AFR AB** | **AFR C** | **AFR D** | **AMR A** | **AMR B** | **AMR C** | **SEAR B** | **SEAR CD** | **EUR A** | **EUR B** | **EUR C** | **EMR A** | **EMR BC** | **EMR D** | **WPR A** | **WPR B** | **WPR C** |
| --- | --- | --- | --- | --- | --- | --- | --- | --- | --- | --- | --- | --- | --- | --- | --- | --- | --- |
| **Enterics diseases (diarrhoeal diseases)** |  |  |  |  |  |  |  |  |  |  |  |  |  |  |  |  |  |
| *Campylobacter spp.* | 5 | 4 | 2 | 18 | 8 | 4 | 4 | 4 | 22 | 4 | 3 | 6 | 3 | 1 | 5 | 3 | 2 |
| *Cryptosporidium spp.* | 3 | 3 | 2 | 11 | 4 | 4 | 4 | 5 | 12 | 7 | 3 | 2 | 2 | 2 | 3 | 2 | 2 |
| *Cyclospora* | 1 | 2 | 1 | 6 | 3 | 3 | 2 | 2 | 4 | 5 | 2 | 1 | 1 | 1 | 2 | 1 | 1 |
| *Entamoeba histolytica* | 4 | 3 | 3 | 5 | 3 | 3 | 2 | 4 | 4 | 5 | 3 | 2 | 2 | 2 | 2 | 2 | 2 |
| *Enteroaggregative E.coli* | 1 | 4 | 1 | 5 | 2 | 1 | 2 | 3 | 4 | 1 | 1 | 3 | 2 | 0 | 1 | 1 | 0 |
| *Enteropathogenic E.coli* | 4 | 6 | 4 | 9 | 3 | 1 | 3 | 4 | 5 | 1 | 0 | 3 | 4 | 0 | 2 | 2 | 0 |
| *Enterotoxigenic E.coli* | 2 | 4 | 1 | 6 | 5 | 2 | 3 | 4 | 5 | 1 | 0 | 3 | 4 | 0 | 2 | 2 | 0 |
| *Giardia* spp. | 3 | 3 | 2 | 6 | 3 | 3 | 3 | 2 | 9 | 5 | 3 | 3 | 3 | 2 | 4 | 2 | 2 |
| Norovirus | 4 | 4 | 4 | 14 | 5 | 5 | 5 | 4 | 13 | 5 | 3 | 5 | 4 | 3 | 8 | 4 | 3 |
| Rotavirus | 3 | 3 | 2 | 6 | 2 | 2 | 1 | 1 | 7 | 2 | 1 | 3 | 1 | 1 | 2 | 2 | 1 |
| Non-typhoidal *Salmonella enterica* | 4 | 5 | 4 | 15 | 8 | 2 | 4 | 4 | 12 | 4 | 2 | 4 | 5 | 1 | 7 | 3 | 2 |
| *Shigella spp*. | 1 | 2 | 1 | 10 | 1 | 1 | 0 | 1 | 5 | 0 | 0 | 1 | 2 | 0 | 0 | 1 | 0 |
| Shiga toxin-producing *E.coli* (STEC) | 2 | 3 | 2 | 14 | 4 | 2 | 1 | 1 | 12 | 2 | 1 | 5 | 3 | 0 | 3 | 2 | 0 |
| Vibrio cholerae | 2 | 2 | 2 | 7 | 2 | 2 | 3 | 1 | 4 | 1 | 1 | 4 | 4 | 1 | 2 | 2 | 1 |
| **Enteric Diseases (invasive and intoxications)** |  |  |  |  |  |  |  |  |  |  |  |  |  |  |  |  |  |
| *Brucella spp.* | 3 | 1 | 3 | 7 | 3 | 1 | 2 | 2 | 5 | 4 | 1 | 2 | 2 | 1 | 2 | 0 | 0 |
| *Clostridium botulinum* | 2 | 2 | 2 | 8 | 4 | 2 | 3 | 3 | 7 | 3 | 2 | 5 | 2 | 1 | 3 | 1 | 1 |
| Hepatitis A virus | 2 | 2 | 1 | 11 | 3 | 2 | 1 | 1 | 6 | 1 | 1 | 6 | 5 | 2 | 4 | 2 | 1 |
| *Listeria monocytogenes* | 3 | 3 | 1 | 14 | 6 | 3 | 2 | 3 | 15 | 4 | 2 | 6 | 3 | 1 | 4 | 3 | 1 |
| *Mycobacterium bovis/caprae/orygis* | 3 | 5 | 5 | 5 | 3 | 0 | 0 | 2 | 4 | 2 | 0 | 1 | 1 | 0 | 1 | 0 | 0 |
| *Salmonella enterica* Paratyphi A | 3 | 2 | 2 | 5 | 3 | 1 |  |  | 3 | 2 | 0 |  |  |  | 1 | 0 | 0 |
| *Salmonella enterica* Typhi | 4 | 2 | 3 | 6 | 3 | 1 |  |  | 4 | 2 | 0 |  |  |  | 1 | 0 | 0 |
| **Parasitic Diseases** |  |  |  |  |  |  |  |  |  |  |  |  |  |  |  |  |  |
| *Ascaris lumbricoides* | 4 | 4 | 3 | 3 | 3 | 3 |  |  | 6 | 6 | 3 |  |  |  | 3 | 2 | 2 |
| *Echinococcus granulosus* | 3 | 3 | 3 | 4 | 4 | 3 |  |  | 7 | 6 | 2 |  |  |  | 2 | 2 | 2 |
| *Echinococcus multilocularis* |  |  |  | 4 |  |  |  |  | 9 | 6 | 3 |  |  |  | 2 | 2 | 2 |
| *Fasciola spp.* | 1 | 2 | 1 | 1 | 1 | 1 |  |  | 5 | 4 | 1 |  |  |  | 1 | 1 | 1 |
| *Toxoplasma gondii* | 3 | 3 | 2 | 5 | 3 | 3 |  |  | 10 | 5 | 2 |  |  |  | 3 | 1 | 1 |
| *Trichinella spp.* | 1 | 1 | 1 | 8 | 3 | 2 |  |  | 7 | 5 | 2 |  |  |  | 1 | 1 | 1 |
| *Trypanosoma cruzi* |  |  |  | 3 | 6 | 4 |  |  |  |  |  |  |  |  |  |  |  |
| **Chemicals and Toxins** |  |  |  |  |  |  |  |  |  |  |  |  |  |  |  |  |  |
| Lead | 2 | 2 | 1 | 5 | 1 | 1 |  |  | 5 | 2 | 2 |  |  |  | 4 | 6 | 2 |

## Supplementary Figures

### Supplementary Figure S1. Attributions (median, 2.5th and 97.5th percentiles) to transmission pathways to foods for 29 hazards for the African Region.


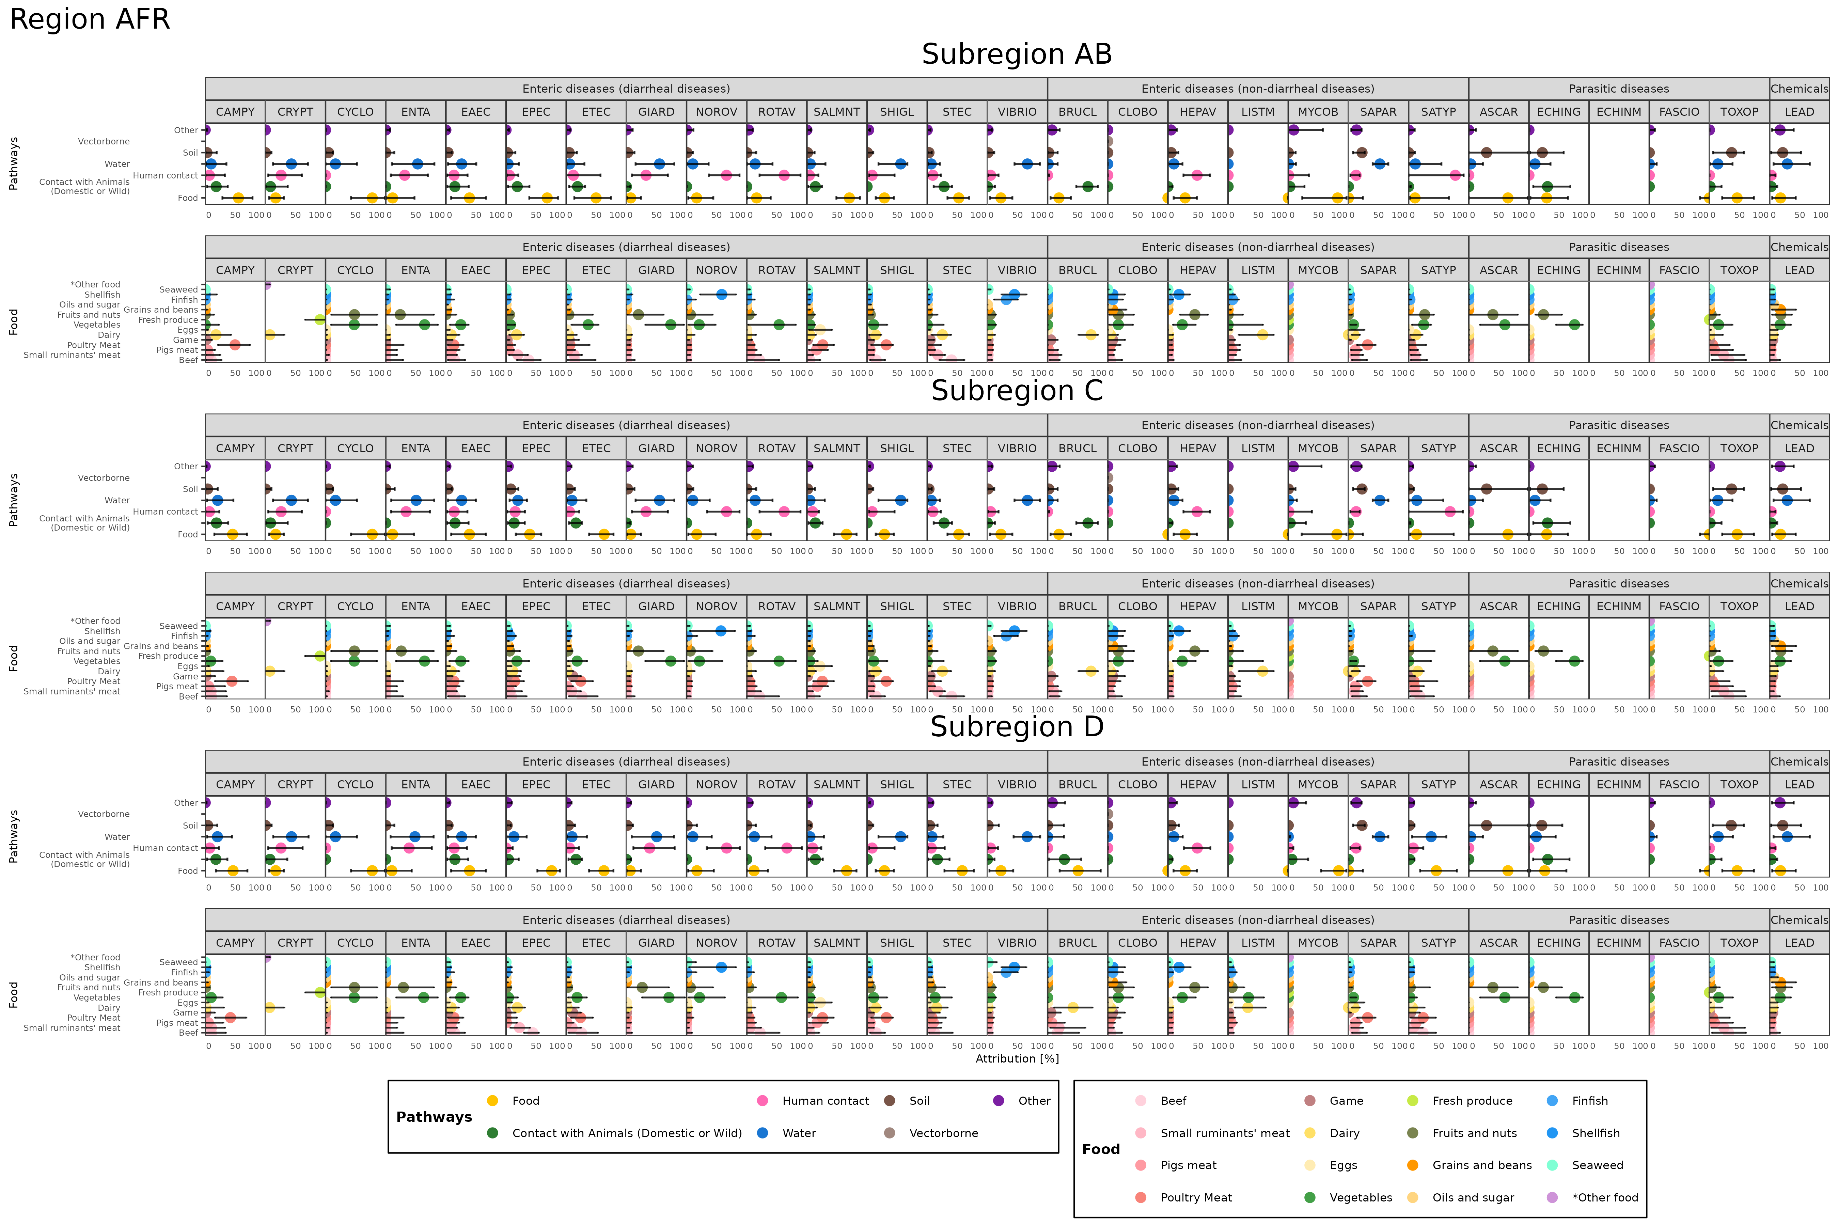


Transmission “vector-borne” is applicable only to *T. cruzi* in the American Region. The category “other food” in the food groups applies only to *Cryptosporidium* and includes all remaining food groups except “dairy” and “fresh produce”. Where estimated,“fresh produce” applies only to *Cryptosporidium* and *Fasciola/Fasciolopsis*, and includes both “vegetables” and “fruits and nuts”. Pathway-level attribution estimates for *T. gondii* and *E. granulosus* were obtained from Hald et al. (2B16b) and Torgerson et al. (2B2B), respectively. For food-level attribution estimates for these parasites (not shown in this picture), we refer to Hoffmann et al. (2B17) and Torgerson et al. (2B2B), respectively. CAMPY = *Campylobacter*, CRYPT = *Cryptosporidium*; CYCLO = *Cyclospora;* ENTA = *Entamoeba histolytica*; EAEC = Enteroaggregative *E. Coli*; EPEC = Enteropathogenic *E. coli*; ETEC = Enterotoxigenic *E. coli*; GIARD = *Giardia*; NOROV = Norovirus; ROTAV = Rotavirus; SALMNT = Non-typhoidal *Salmonella enterica*; SHIGL = *Shigella*; STEC = Shiga toxin-producing *E. coli*; VIBRIO = *Vibrio cholerae*; BRUCL = *Brucella*; CLOBO = *Clostridium botulinum*; HEPAV = Hepatitis A virus; LISTM = *Listeria monocytogenes*; MYCOB = *Mycobacterium bovis/caprae/orygis*; SAPAR = *Salmonella* Paratyphi; SATYP = *Salmonella* Typhi; ASCAR = *Ascaris*; ECHING = *Echinococcus granulosus*; ECHINM = *Echinococcus multilocularis*; FASCIO = *Fasciola* & *Fasciolopsis*; TOXOP = *Toxoplasma gondii*; LEAD = Lead.

### Supplementary Figure S2. Attributions (median, 2.5th and 97.5th percentiles) to transmission pathways to foods for 29 hazards for the Region of the Americas.


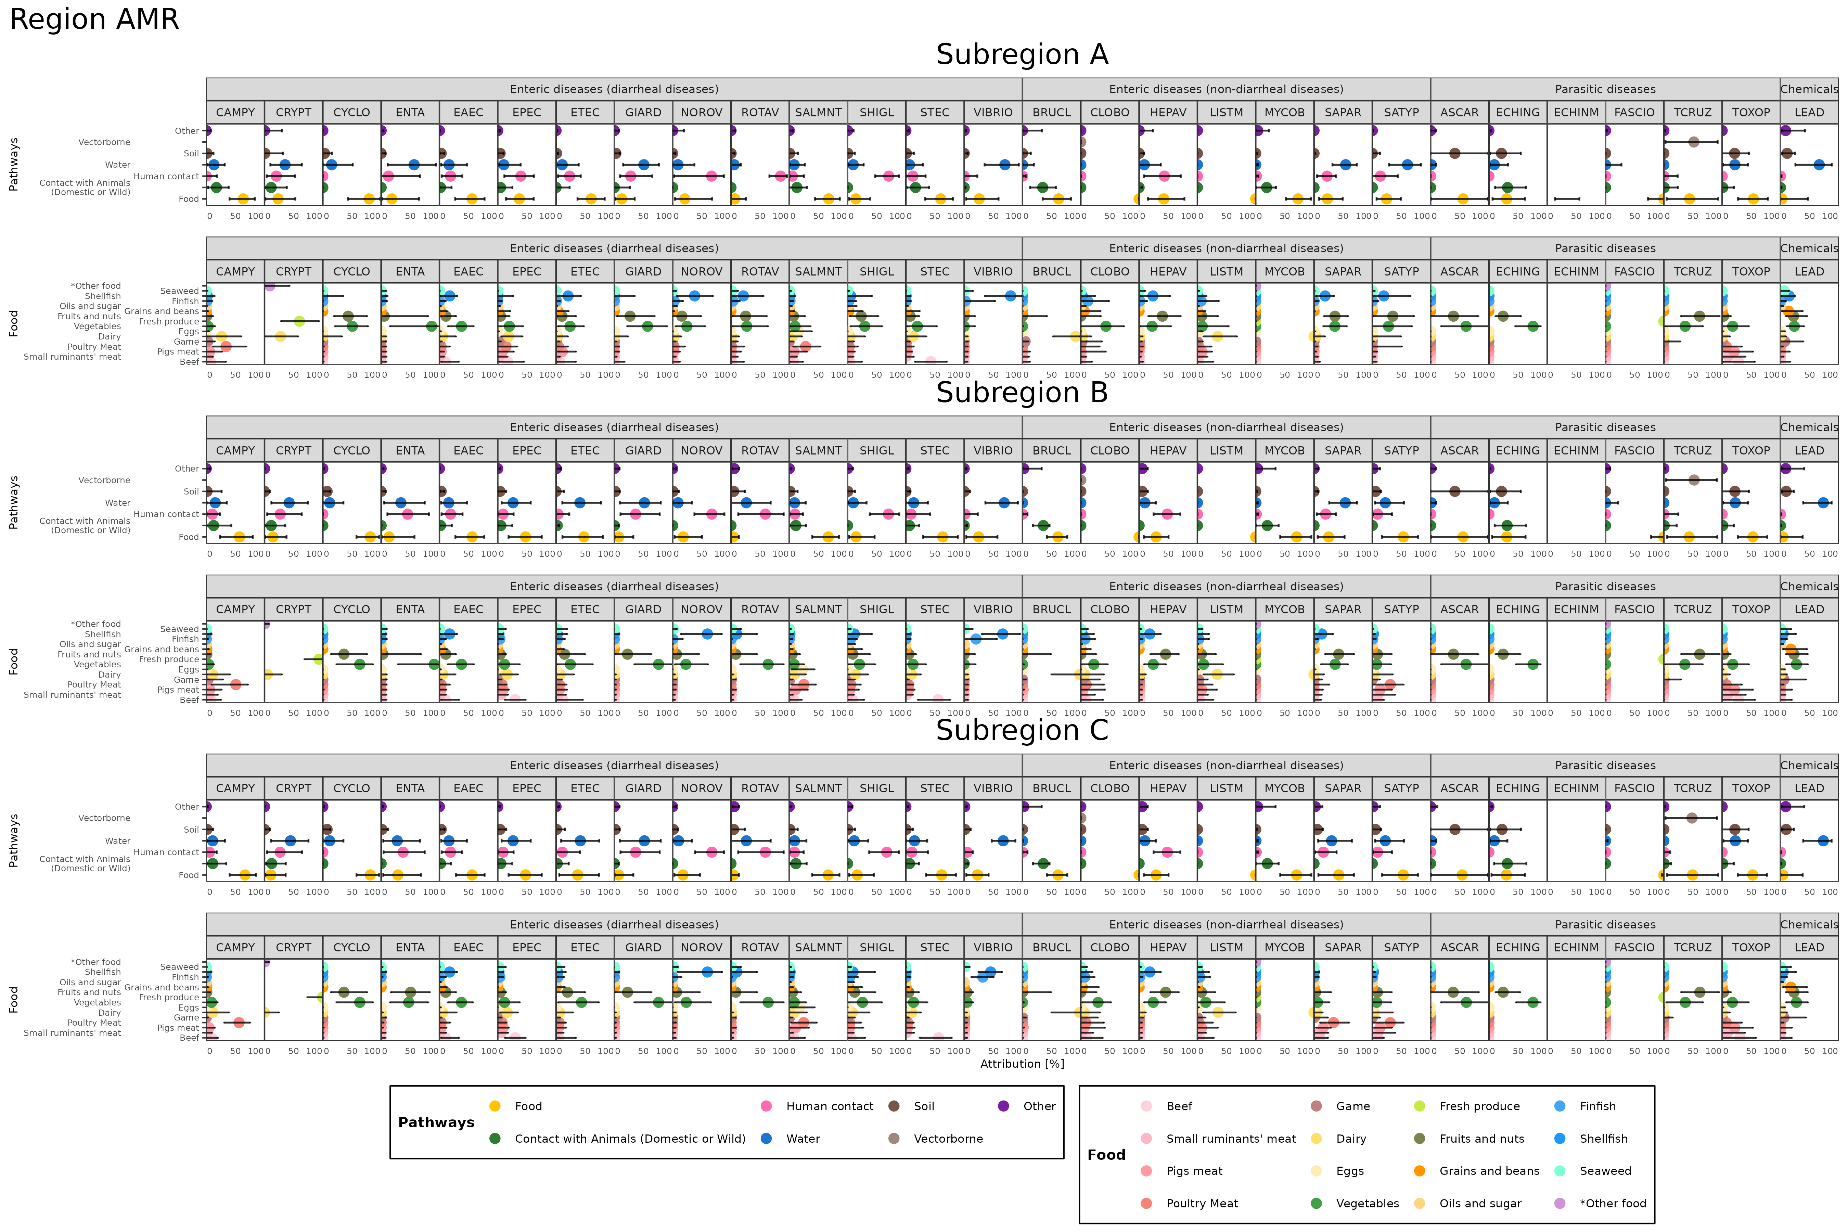


The category “other food” in the food groups applies only to *Cryptosporidium* and includes all remaining food groups except “dairy” and “fresh produce”. Where estimated,“fresh produce” applies only to *Cryptosporidium* and *Fasciola/Fasciolopsis*, and includes both “vegetables” and “fruits and nuts”. Pathway-level attribution estimates for *T. gondii* and *E. granulosus* were obtained from Hald et al. (2B16b) and Torgerson et al. (2B2B), respectively. For food-level attribution estimates for these parasites (not shown in this picture), we refer to Hoffmann et al. (2B17) and Torgerson et al. (2B2B), respectively. CAMPY = *Campylobacter*, CRYPT = *Cryptosporidium*; CYCLO = *Cyclospora;* ENTA = *Entamoeba histolytica*; EAEC = Enteroaggregative *E. Coli*; EPEC = Enteropathogenic *E. coli*; ETEC = Enterotoxigenic *E. coli*; GIARD = *Giardia*; NOROV = Norovirus; ROTAV = Rotavirus; SALMNT = Non-typhoidal *Salmonella enterica*; SHIGL = *Shigella*; STEC = Shiga toxin-producing *E. coli*; VIBRIO = *Vibrio cholerae*; BRUCL = *Brucella*; CLOBO = *Clostridium botulinum*; HEPAV = Hepatitis A virus; LISTM = *Listeria monocytogenes*; MYCOB = *Mycobacterium bovis/caprae/orygis*; SAPAR = *Salmonella* Paratyphi; SATYP = *Salmonella* Typhi; ASCAR = *Ascaris*; ECHING = *Echinococcus granulosus*; ECHINM = *Echinococcus multilocularis*; FASCIO = *Fasciola* & *Fasciolopsis*; TOXOP = *Toxoplasma gondii*; LEAD = Lead.

### Supplementary Figure S3. Attributions (median, 2.5th and 97.5th percentiles) to transmission pathways to foods for 29 hazards for the South-East Asia Region.


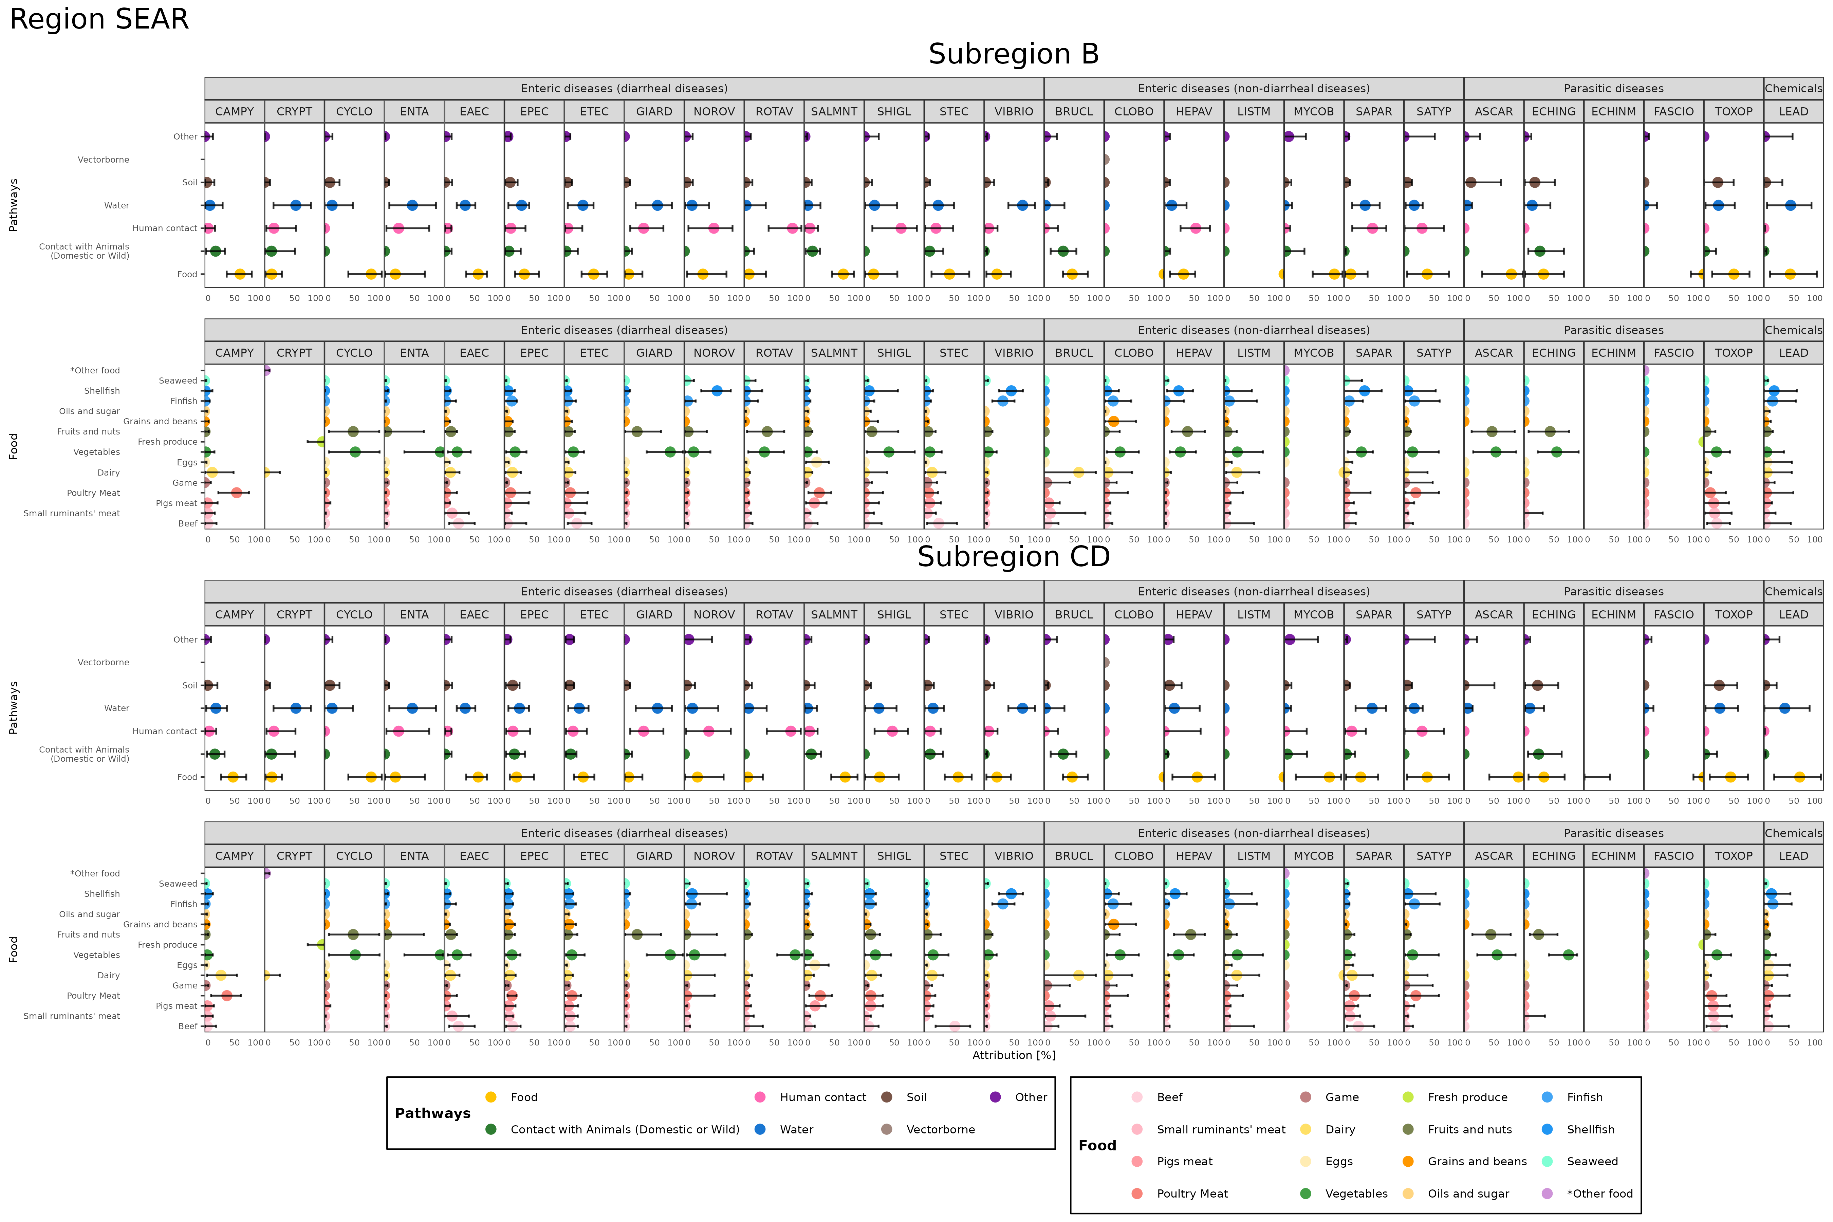


Transmission “vector-borne” is applicable only to *T. cruzi* in the Region of Americas. The category “other food” in the food groups applies only to *Cryptosporidium* and includes all remaining food groups except “dairy” and “fresh produce”. Where estimated,“fresh produce” applies only to *Cryptosporidium* and *Fasciola/Fasciolopsis*, and includes both “vegetables” and “fruits and nuts”. Pathway-level attribution estimates for *T. gondii* and *E. granulosus* were obtained from Hald et al. (2B16b) and Torgerson et al. (2B2B), respectively. For food-level attribution estimates for these parasites (not shown in this picture), we refer to Hoffmann et al. (2B17) and Torgerson et al. (2B2B), respectively. CAMPY = *Campylobacter*, CRYPT = *Cryptosporidium*; CYCLO = *Cyclospora;* ENTA = *Entamoeba histolytica*; EAEC = Enteroaggregative *E. Coli*; EPEC = Enteropathogenic *E. coli*; ETEC = Enterotoxigenic *E. coli*; GIARD = *Giardia*; NOROV = Norovirus; ROTAV = Rotavirus; SALMNT = Non-typhoidal *Salmonella enterica*; SHIGL = *Shigella*; STEC = Shiga toxin-producing *E. coli*; VIBRIO = *Vibrio cholerae*; BRUCL = *Brucella*; CLOBO = *Clostridium botulinum*; HEPAV = Hepatitis A virus; LISTM = *Listeria monocytogenes*; MYCOB = *Mycobacterium bovis/caprae/orygis*; SAPAR = *Salmonella* Paratyphi; SATYP = *Salmonella* Typhi; ASCAR = *Ascaris*; ECHING = *Echinococcus granulosus*; ECHINM = *Echinococcus multilocularis*; FASCIO = *Fasciola* & *Fasciolopsis*; TOXOP = *Toxoplasma gondii*; LEAD = Lead.

### Supplementary Figure 4. Detailed attributions (median, 2.5th and 97.5th percentiles) to transmission pathways to foods for 29 hazards for the European Region.


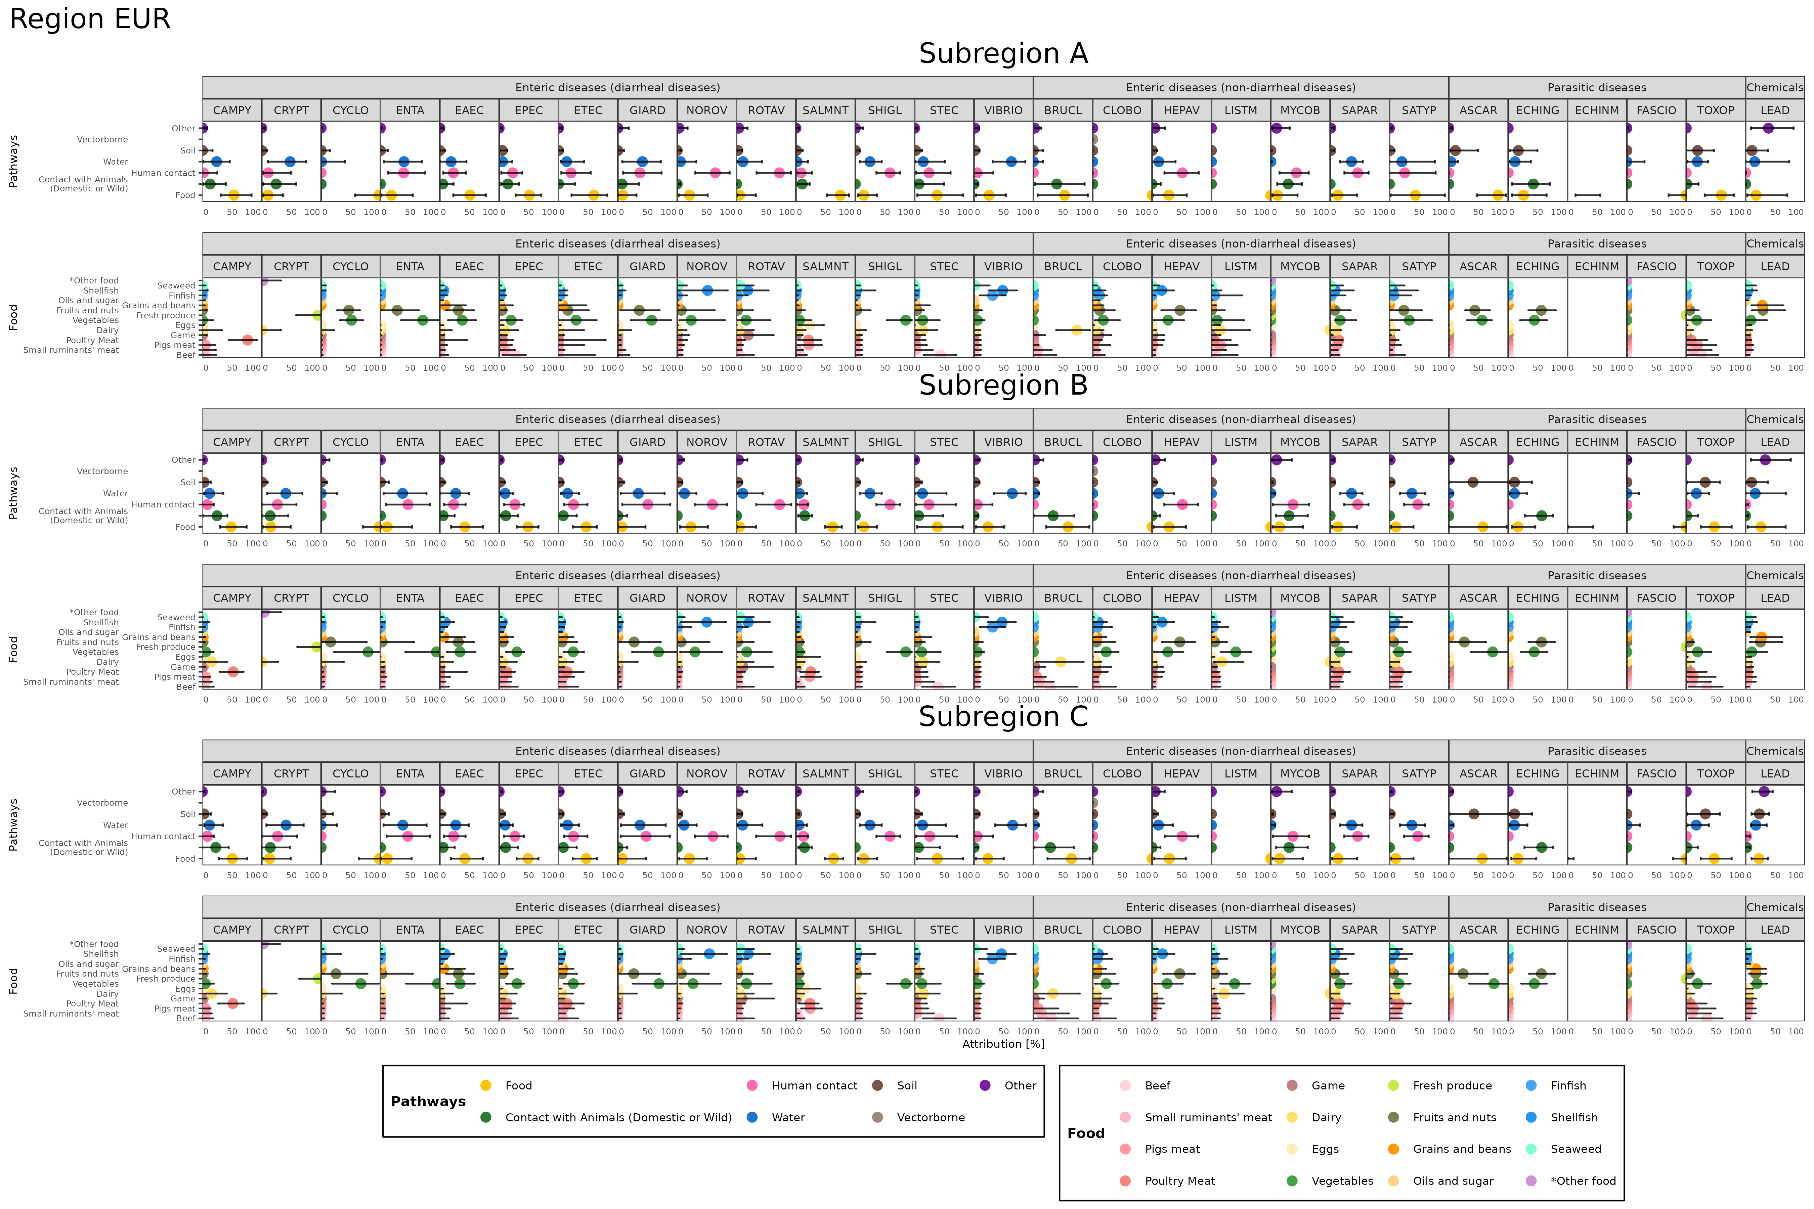


Transmission “vector-borne” is applicable only to *T. cruzi* in the Region of Americas. The category “other food” in the food groups applies only to *Cryptosporidium* and includes all remaining food groups except “dairy” and “fresh produce”. Where estimated,“fresh produce” applies only to *Cryptosporidium* and *Fasciola/Fasciolopsis*, and includes both “vegetables” and “fruits and nuts”. Pathway-level attribution estimates for *T. gondii* and *E. granulosus* were obtained from Hald et al. (2B16b) and Torgerson et al. (2B2B), respectively. For food-level attribution estimates for these parasites (not shown in this picture), we refer to Hoffmann et al. (2B17) and Torgerson et al. (2B2B), respectively. CAMPY = *Campylobacter*, CRYPT = *Cryptosporidium*; CYCLO = *Cyclospora;* ENTA = *Entamoeba histolytica*; EAEC = Enteroaggregative *E. Coli*; EPEC = Enteropathogenic *E. coli*; ETEC = Enterotoxigenic *E. coli*; GIARD = *Giardia*; NOROV = Norovirus; ROTAV = Rotavirus; SALMNT = Non-typhoidal *Salmonella enterica*; SHIGL = *Shigella*; STEC = Shiga toxin-producing *E. coli*; VIBRIO = *Vibrio cholerae*; BRUCL = *Brucella*; CLOBO = *Clostridium botulinum*; HEPAV = Hepatitis A virus; LISTM = *Listeria monocytogenes*; MYCOB = *Mycobacterium bovis/caprae/orygis*; SAPAR = *Salmonella* Paratyphi; SATYP = *Salmonella* Typhi; ASCAR = *Ascaris*; ECHING = *Echinococcus granulosus*; ECHINM = *Echinococcus multilocularis*; FASCIO = *Fasciola* & *Fasciolopsis*; TOXOP = *Toxoplasma gondii*; LEAD = Lead.

### Supplementary Figure S5. Attributions (median, 2.5th and 97.5th percentiles) to transmission pathways to foods for 29 hazards for the Eastern Mediterranean Region.


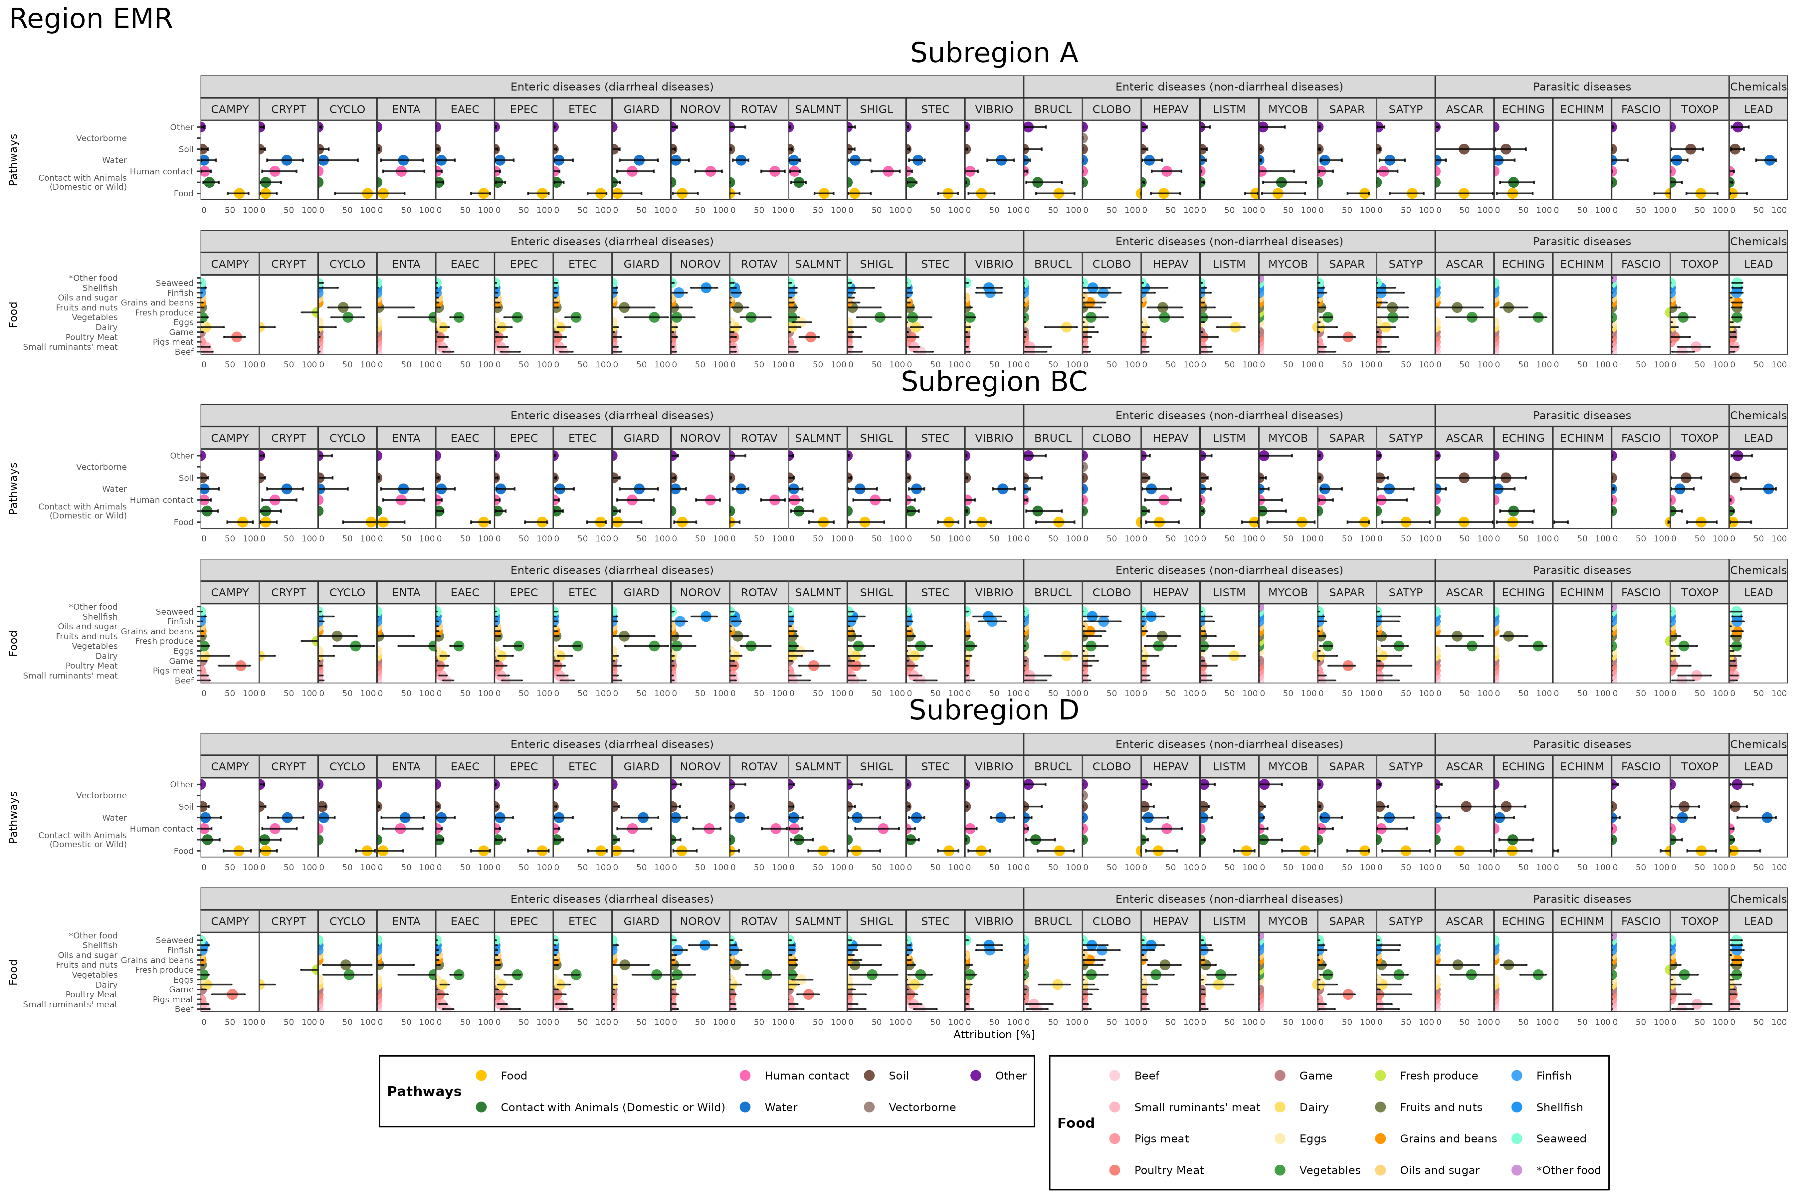


Transmission “vector-borne” is applicable only to *T. cruzi* in the Region of Americas. The category “other food” in the food groups applies only to *Cryptosporidium* and includes all remaining food groups except “dairy” and “fresh produce”. Where estimated,“fresh produce” applies only to *Cryptosporidium* and *Fasciola/Fasciolopsis*, and includes both “vegetables” and “fruits and nuts”. Pathway-level attribution estimates for *T. gondii* and *E. granulosus* were obtained from Hald et al. (2B16b) and Torgerson et al. (2B2B), respectively. For food-level attribution estimates for these parasites (not shown in this picture), we refer to Hoffmann et al. (2B17) and Torgerson et al. (2B2B), respectively. CAMPY = *Campylobacter*, CRYPT = *Cryptosporidium*; CYCLO = *Cyclospora;* ENTA = *Entamoeba histolytica*; EAEC = Enteroaggregative *E. Coli*; EPEC = Enteropathogenic *E. coli*; ETEC = Enterotoxigenic *E. coli*; GIARD = *Giardia*; NOROV = Norovirus; ROTAV = Rotavirus; SALMNT = Non-typhoidal *Salmonella enterica*; SHIGL = *Shigella*; STEC = Shiga toxin-producing *E. coli*; VIBRIO = *Vibrio cholerae*; BRUCL = *Brucella*; CLOBO = *Clostridium botulinum*; HEPAV = Hepatitis A virus; LISTM = *Listeria monocytogenes*; MYCOB = *Mycobacterium bovis/caprae/orygis*; SAPAR = *Salmonella* Paratyphi; SATYP = *Salmonella* Typhi; ASCAR = *Ascaris*; ECHING = *Echinococcus granulosus*; ECHINM = *Echinococcus multilocularis*; FASCIO = *Fasciola* & *Fasciolopsis*; TOXOP = *Toxoplasma gondii*; LEAD = Lead.

### Supplementary Figure S6. Attributions (median, 2.5th and 97.5th percentiles) to transmission pathways to foods for 29 hazards for the Western Pacific Region.


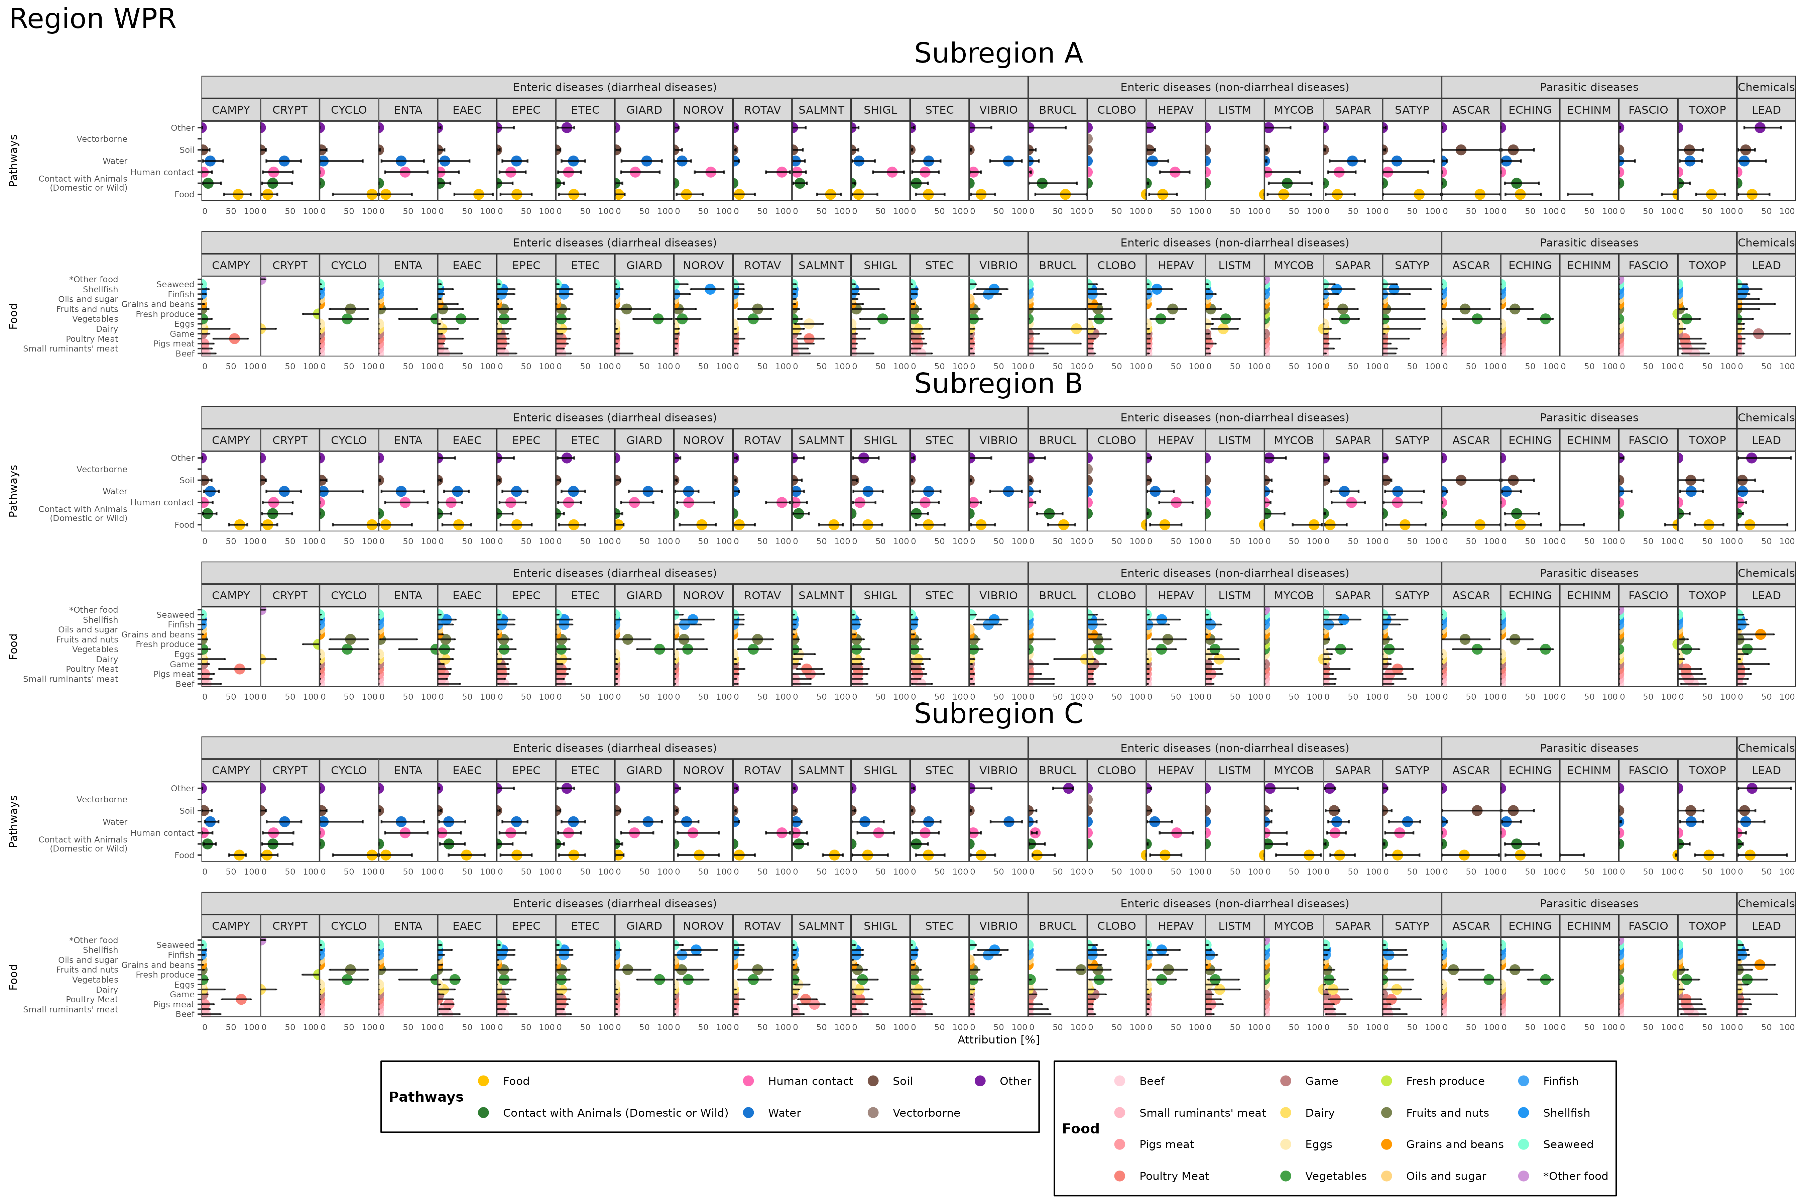


Transmission “vector-borne” is applicable only to *T. cruzi* in the Region of Americas. The category “other food” in the food groups applies only to *Cryptosporidium* and includes all remaining food groups except “dairy” and “fresh produce”. Where estimated,“fresh produce” applies only to *Cryptosporidium* and *Fasciola/Fasciolopsis*, and includes both “vegetables” and “fruits and nuts”. Pathway-level attribution estimates for *T. gondii* and *E. granulosus* were obtained from Hald et al. (2B16b) and Torgerson et al. (2B2B), respectively. For food-level attribution estimates for these parasites (not shown in this picture), we refer to Hoffmann et al. (2B17) and Torgerson et al. (2B2B), respectively. CAMPY = *Campylobacter*, CRYPT = *Cryptosporidium*; CYCLO = *Cyclospora;* ENTA = *Entamoeba histolytica*; EAEC = Enteroaggregative *E. Coli*; EPEC = Enteropathogenic *E. coli*; ETEC = Enterotoxigenic *E. coli*; GIARD = *Giardia*; NOROV = Norovirus; ROTAV = Rotavirus; SALMNT = Non-typhoidal *Salmonella enterica*; SHIGL = *Shigella*; STEC = Shiga toxin-producing *E. coli*; VIBRIO = *Vibrio cholerae*; BRUCL = *Brucella*; CLOBO = *Clostridium botulinum*; HEPAV = Hepatitis A virus; LISTM = *Listeria monocytogenes*; MYCOB = *Mycobacterium bovis/caprae/orygis*; SAPAR = *Salmonella* Paratyphi; SATYP = *Salmonella* Typhi; ASCAR = *Ascaris*; ECHING = *Echinococcus granulosus*; ECHINM = *Echinococcus multilocularis*; FASCIO = *Fasciola* & *Fasciolopsis*; TOXOP = *Toxoplasma gondii*; LEAD = Lead.

Supplementary Figures S7. Estimated attribution proportion to main pathways in FERG 2015 (median and 95% Confidence Interval) (Hald et al., 2016) and FERG 2026 (mean and 95% Confidence Interval) for nine enteric hazards.
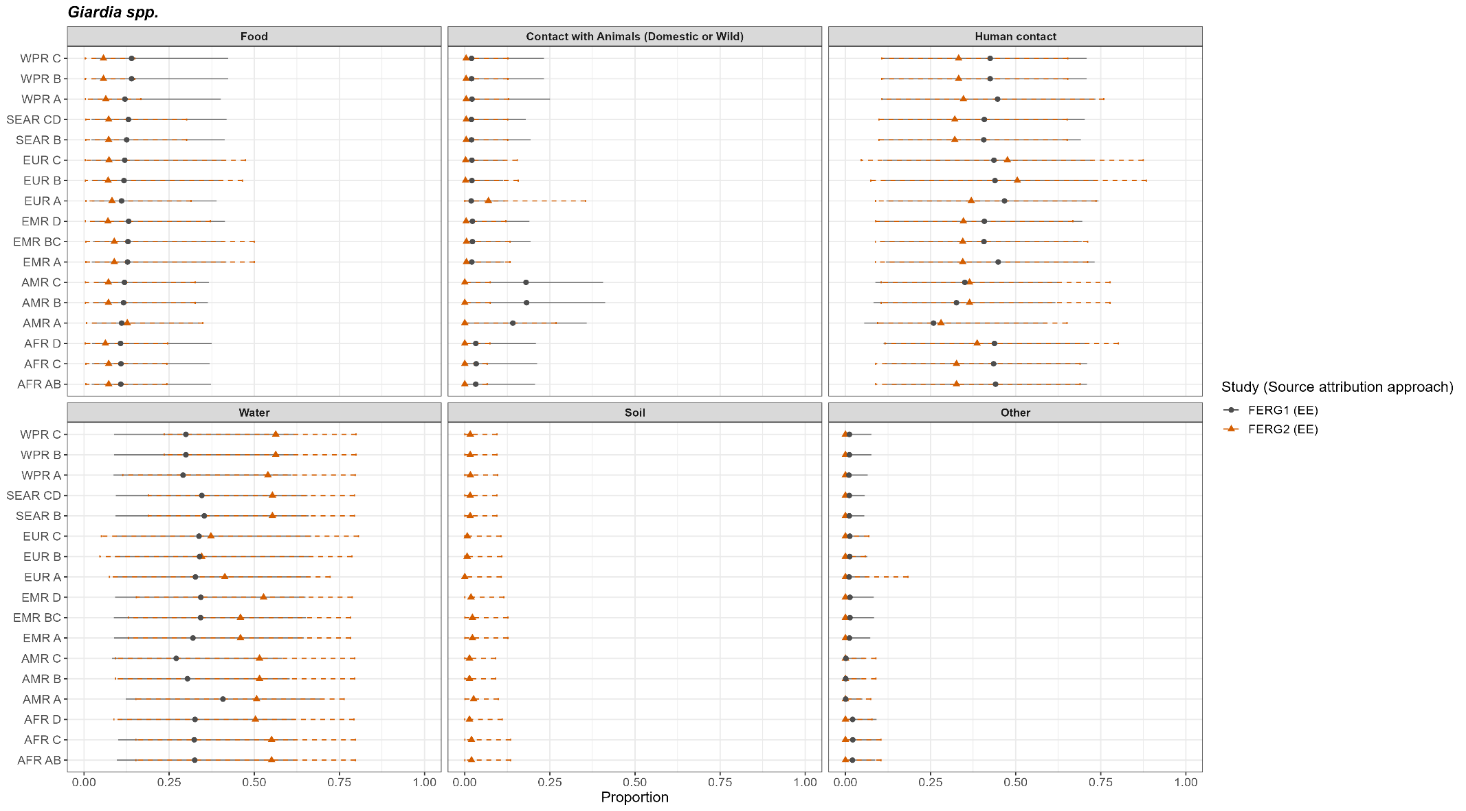

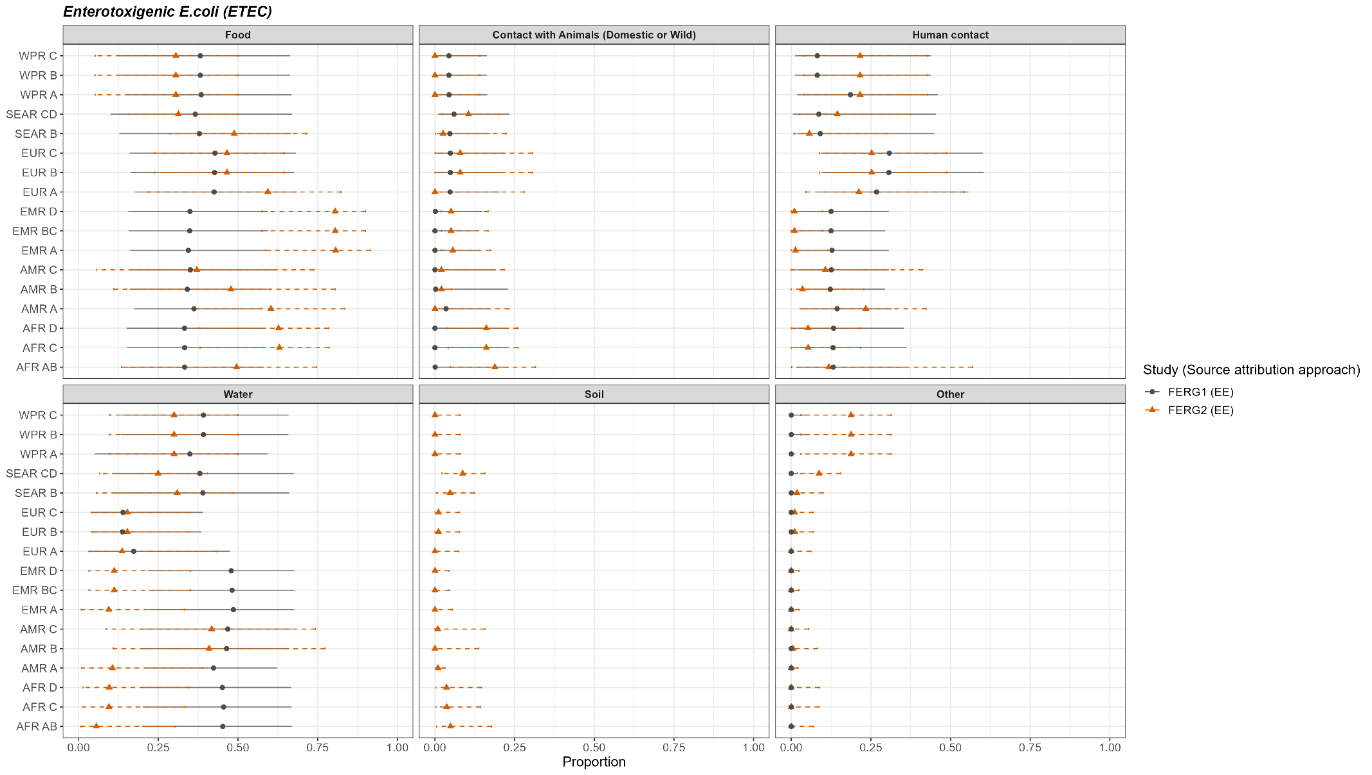

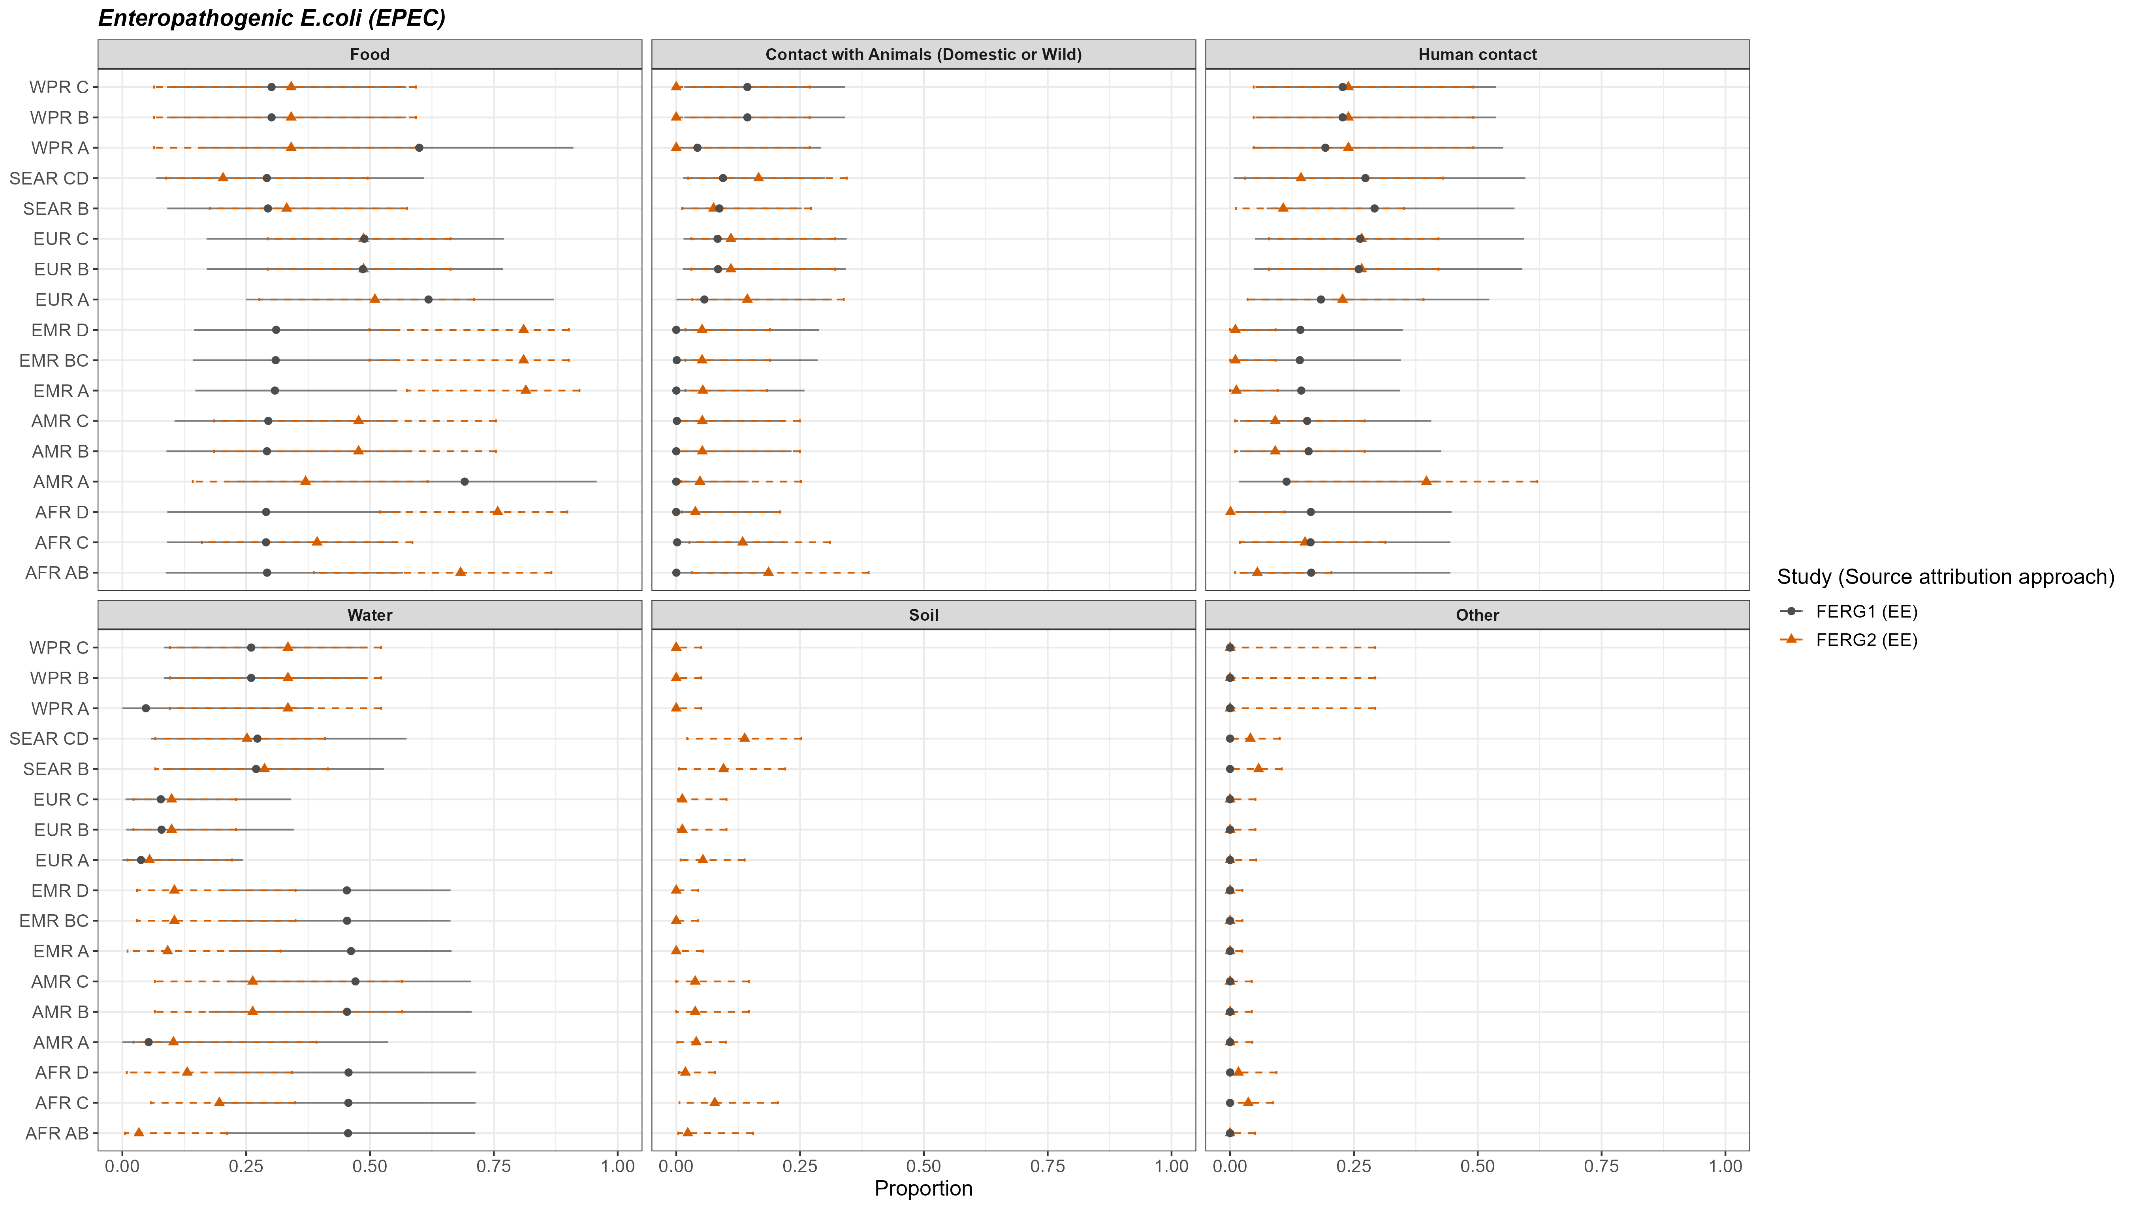

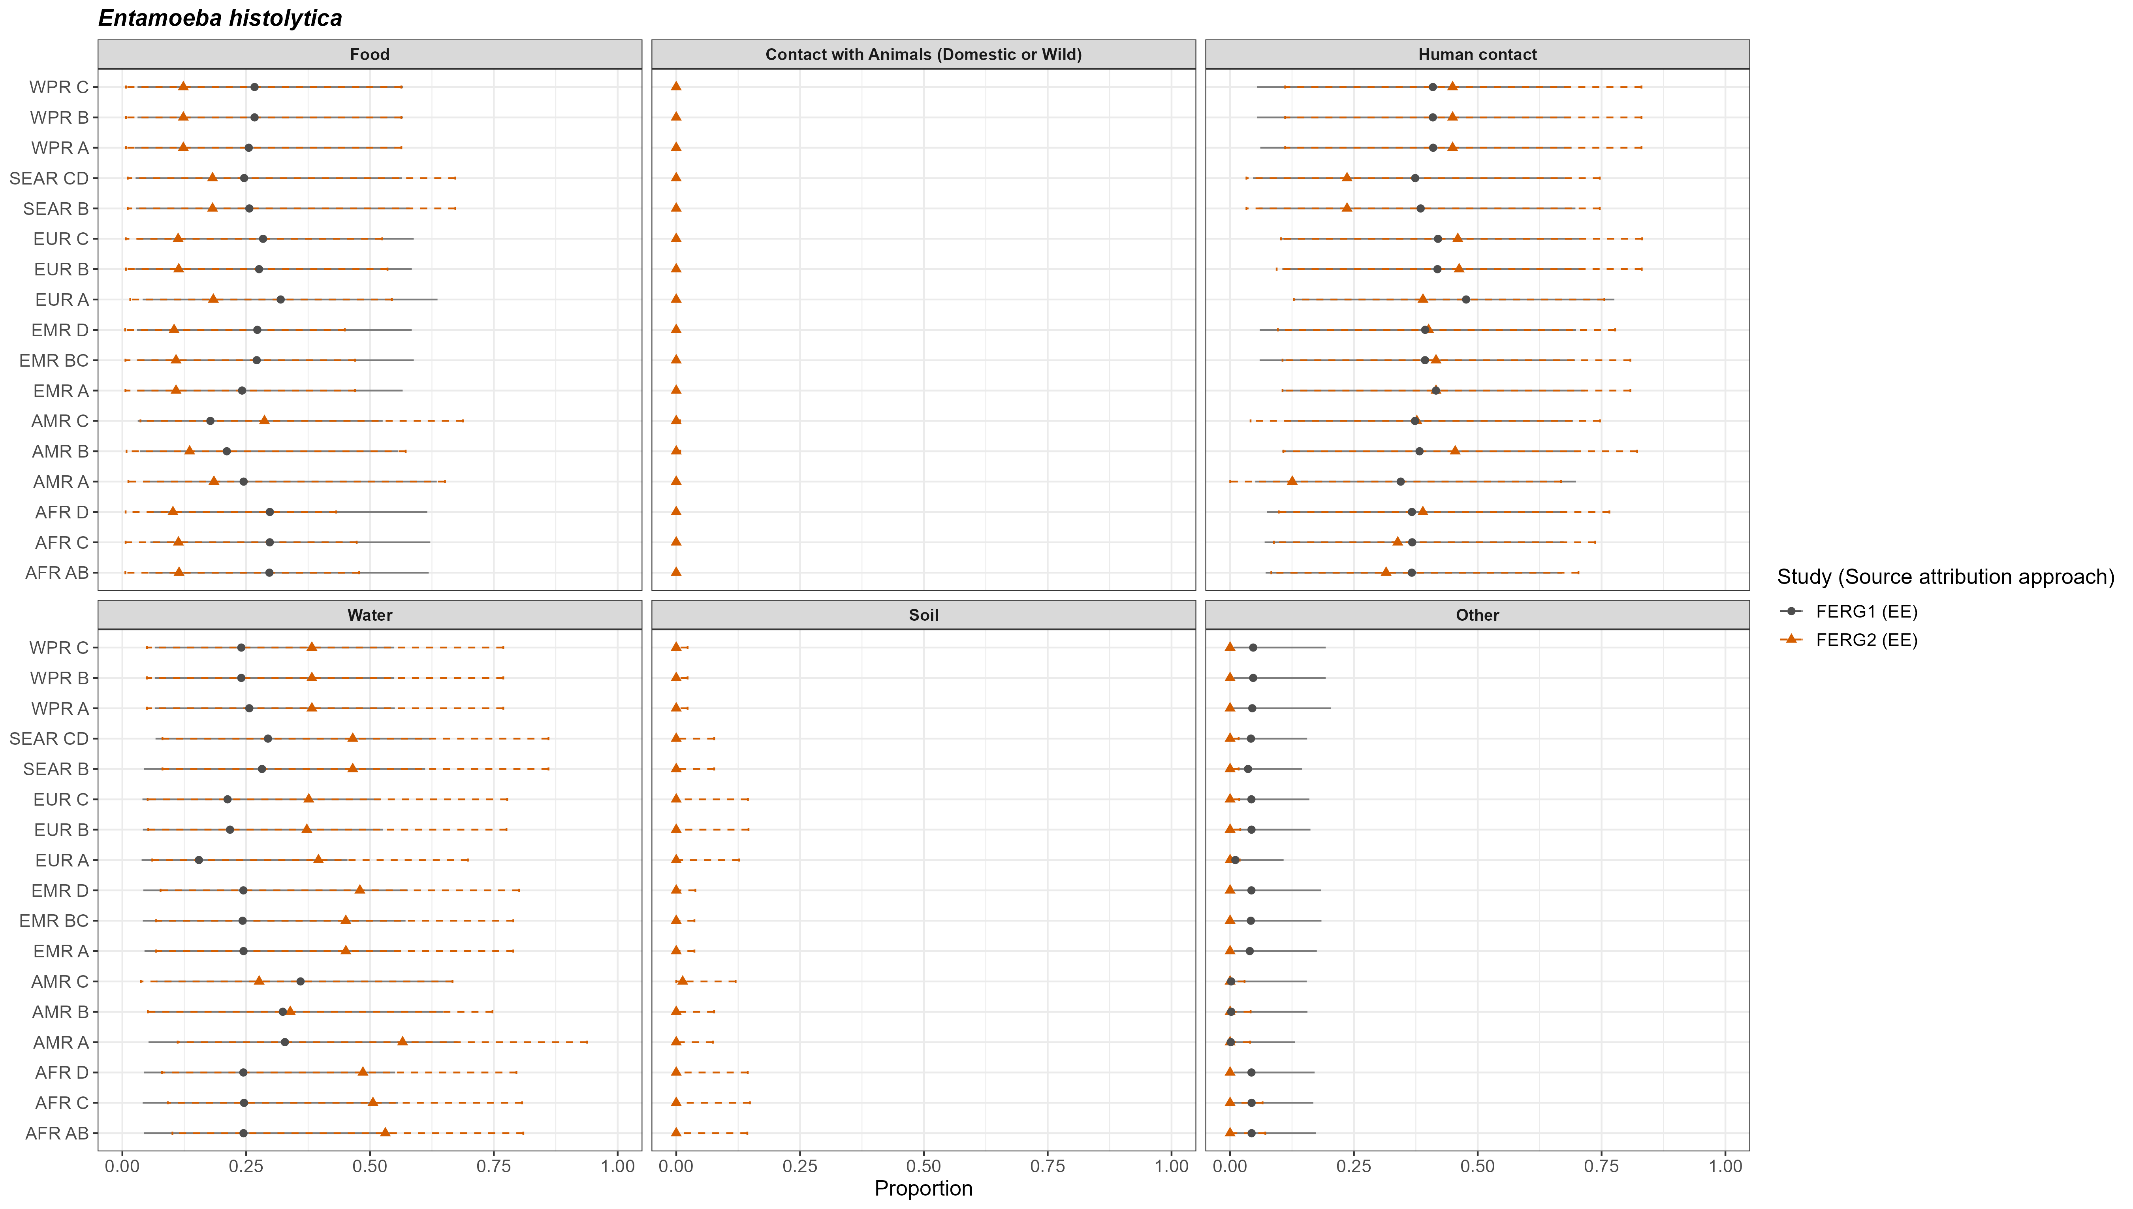

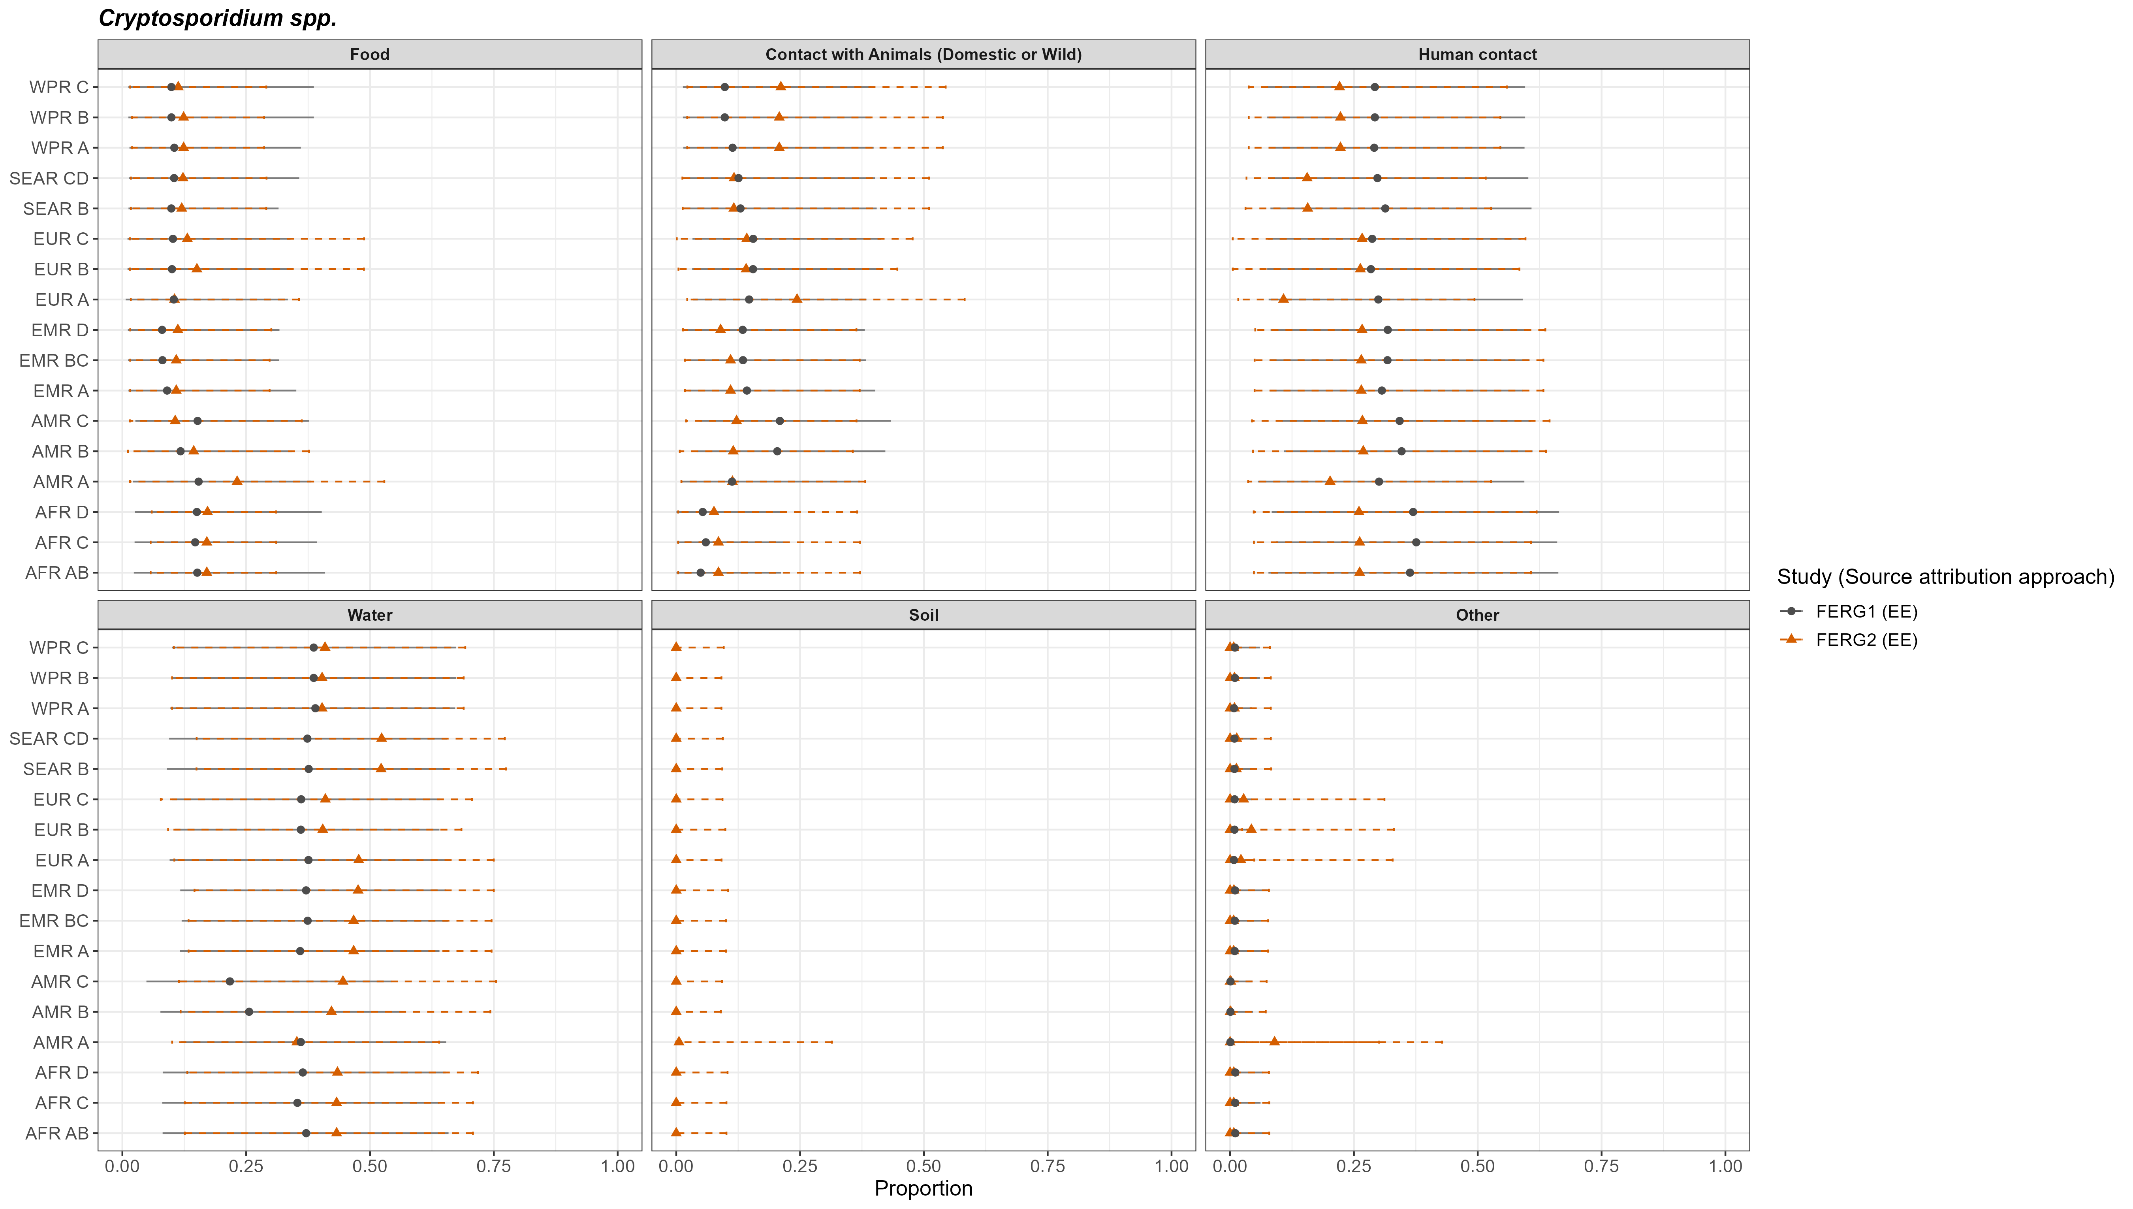

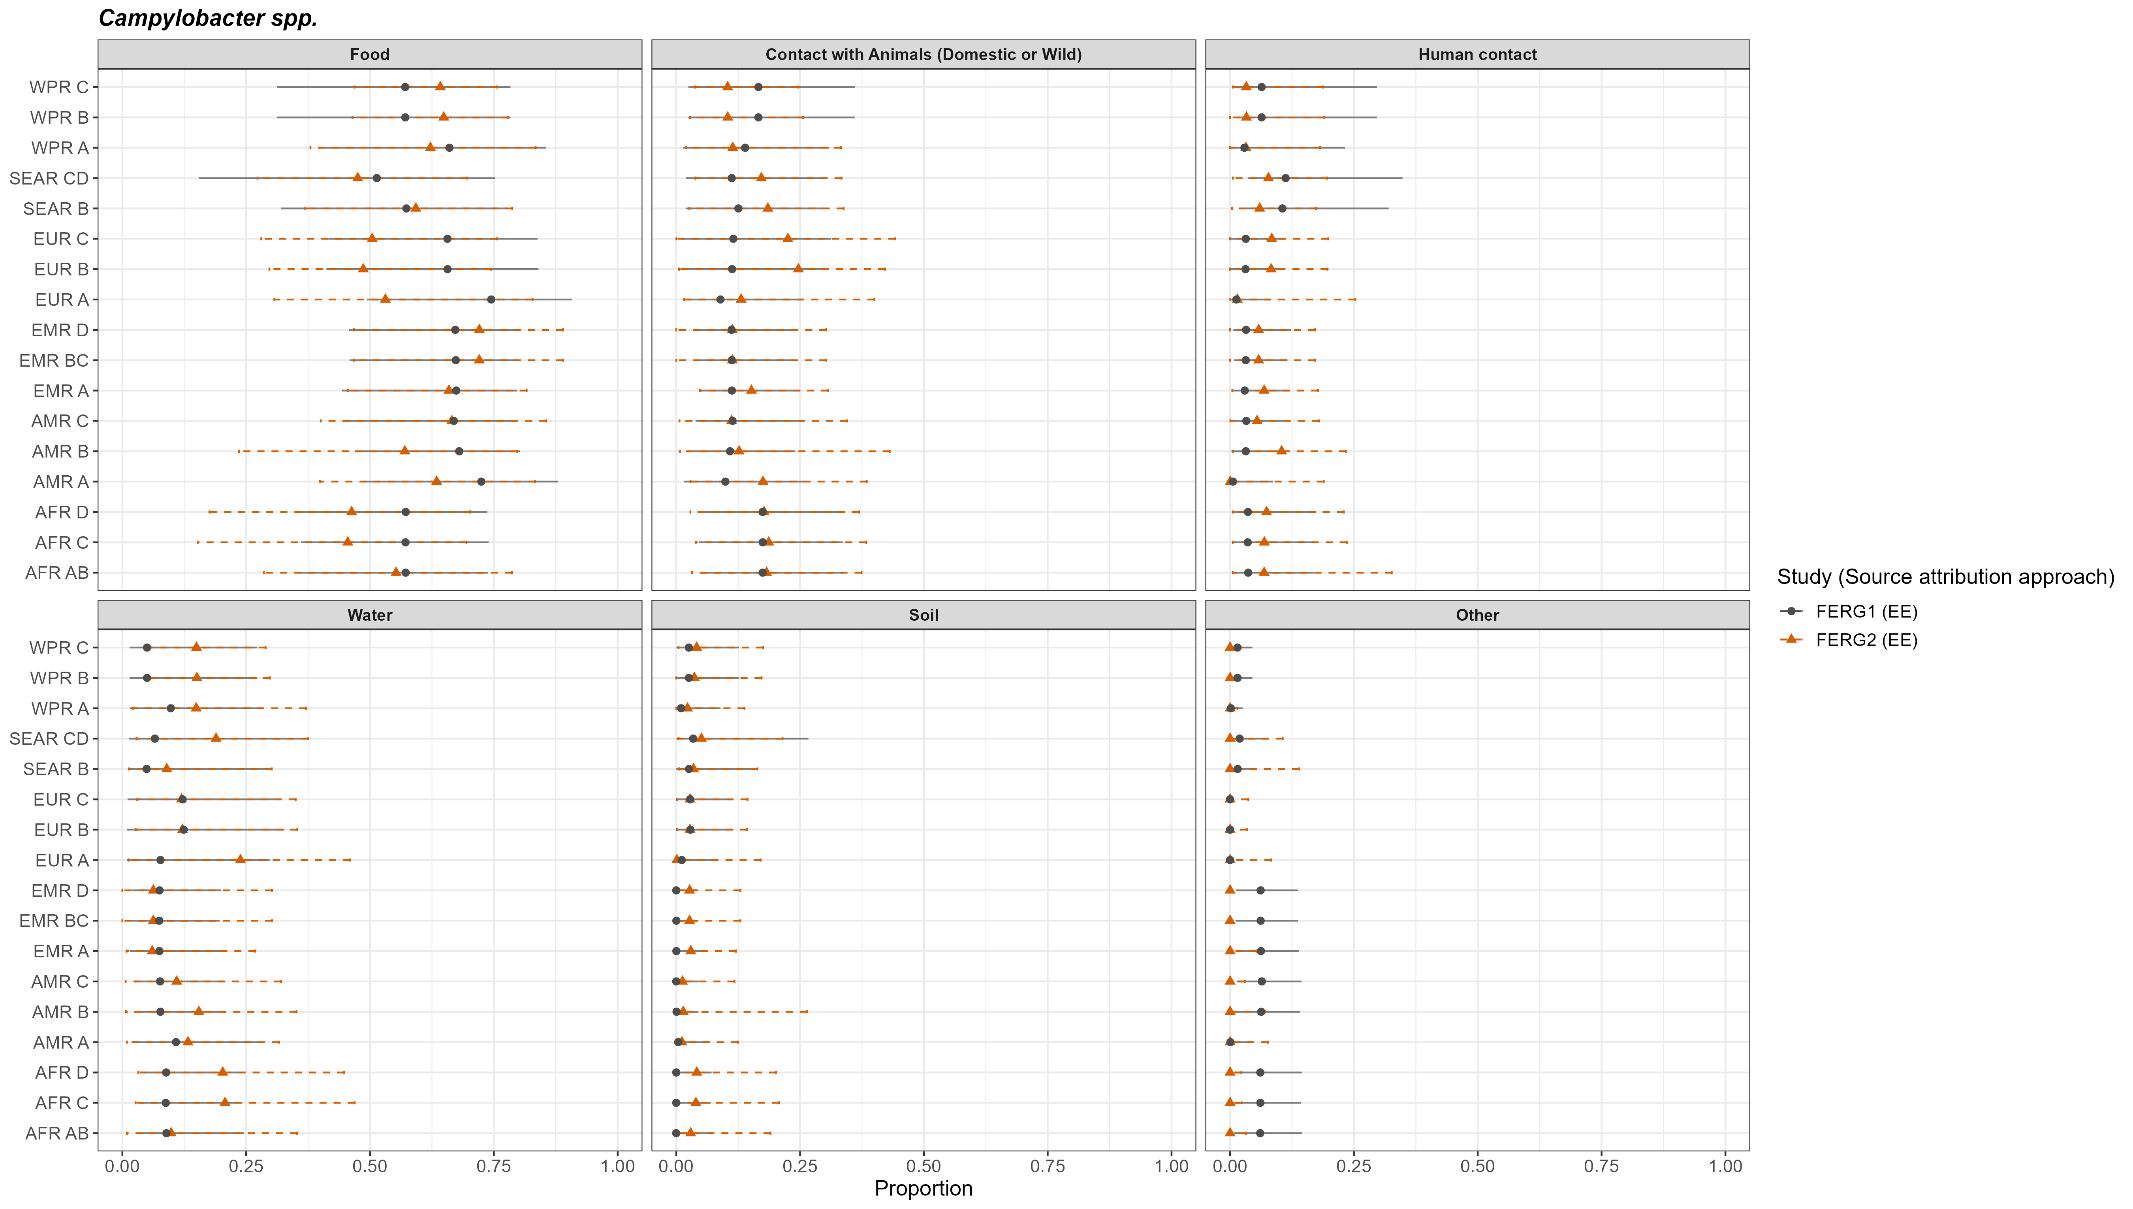

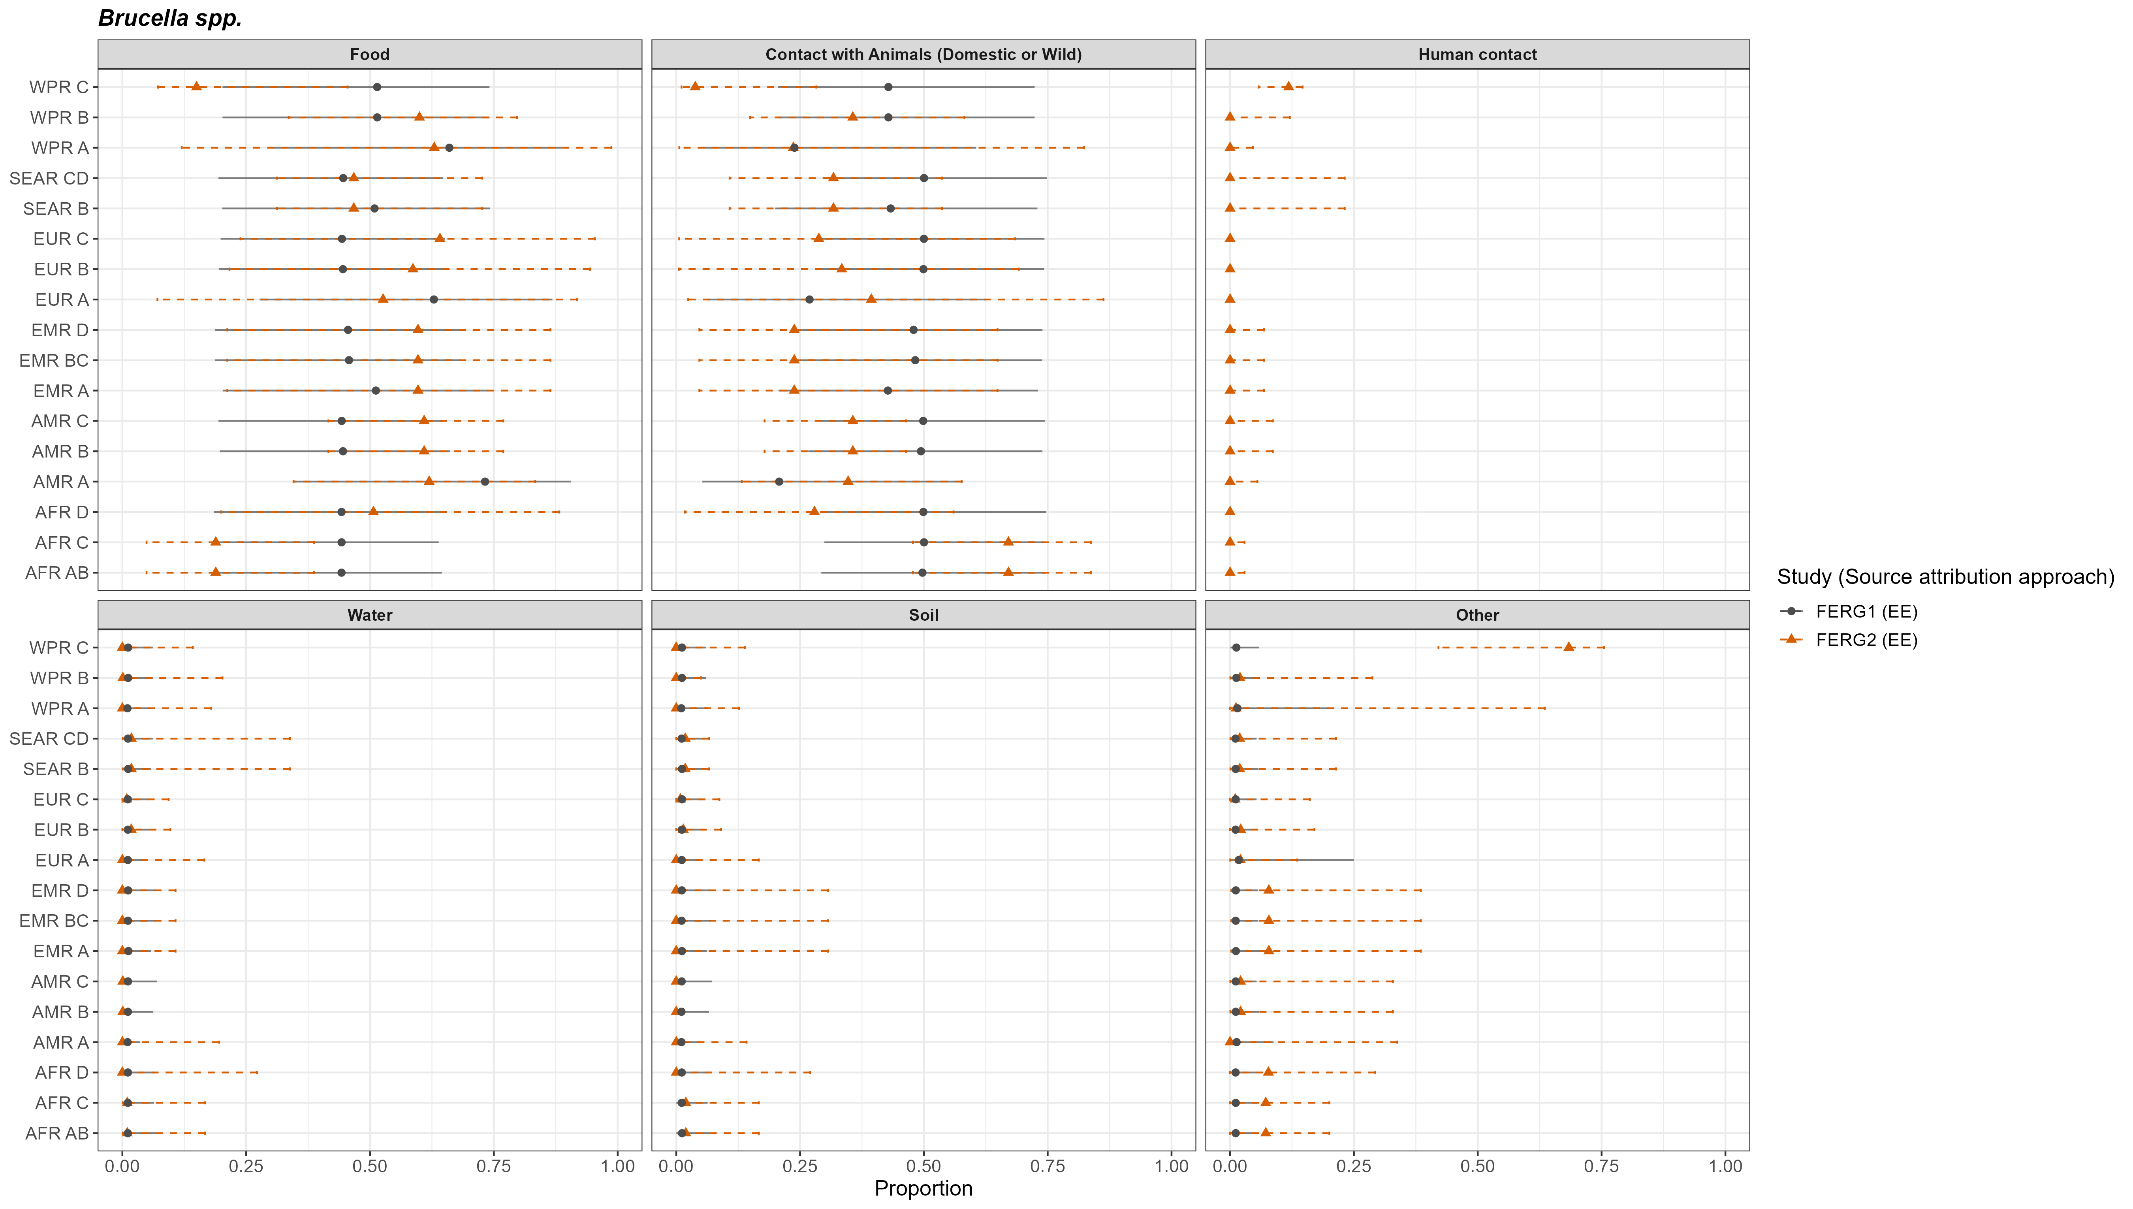

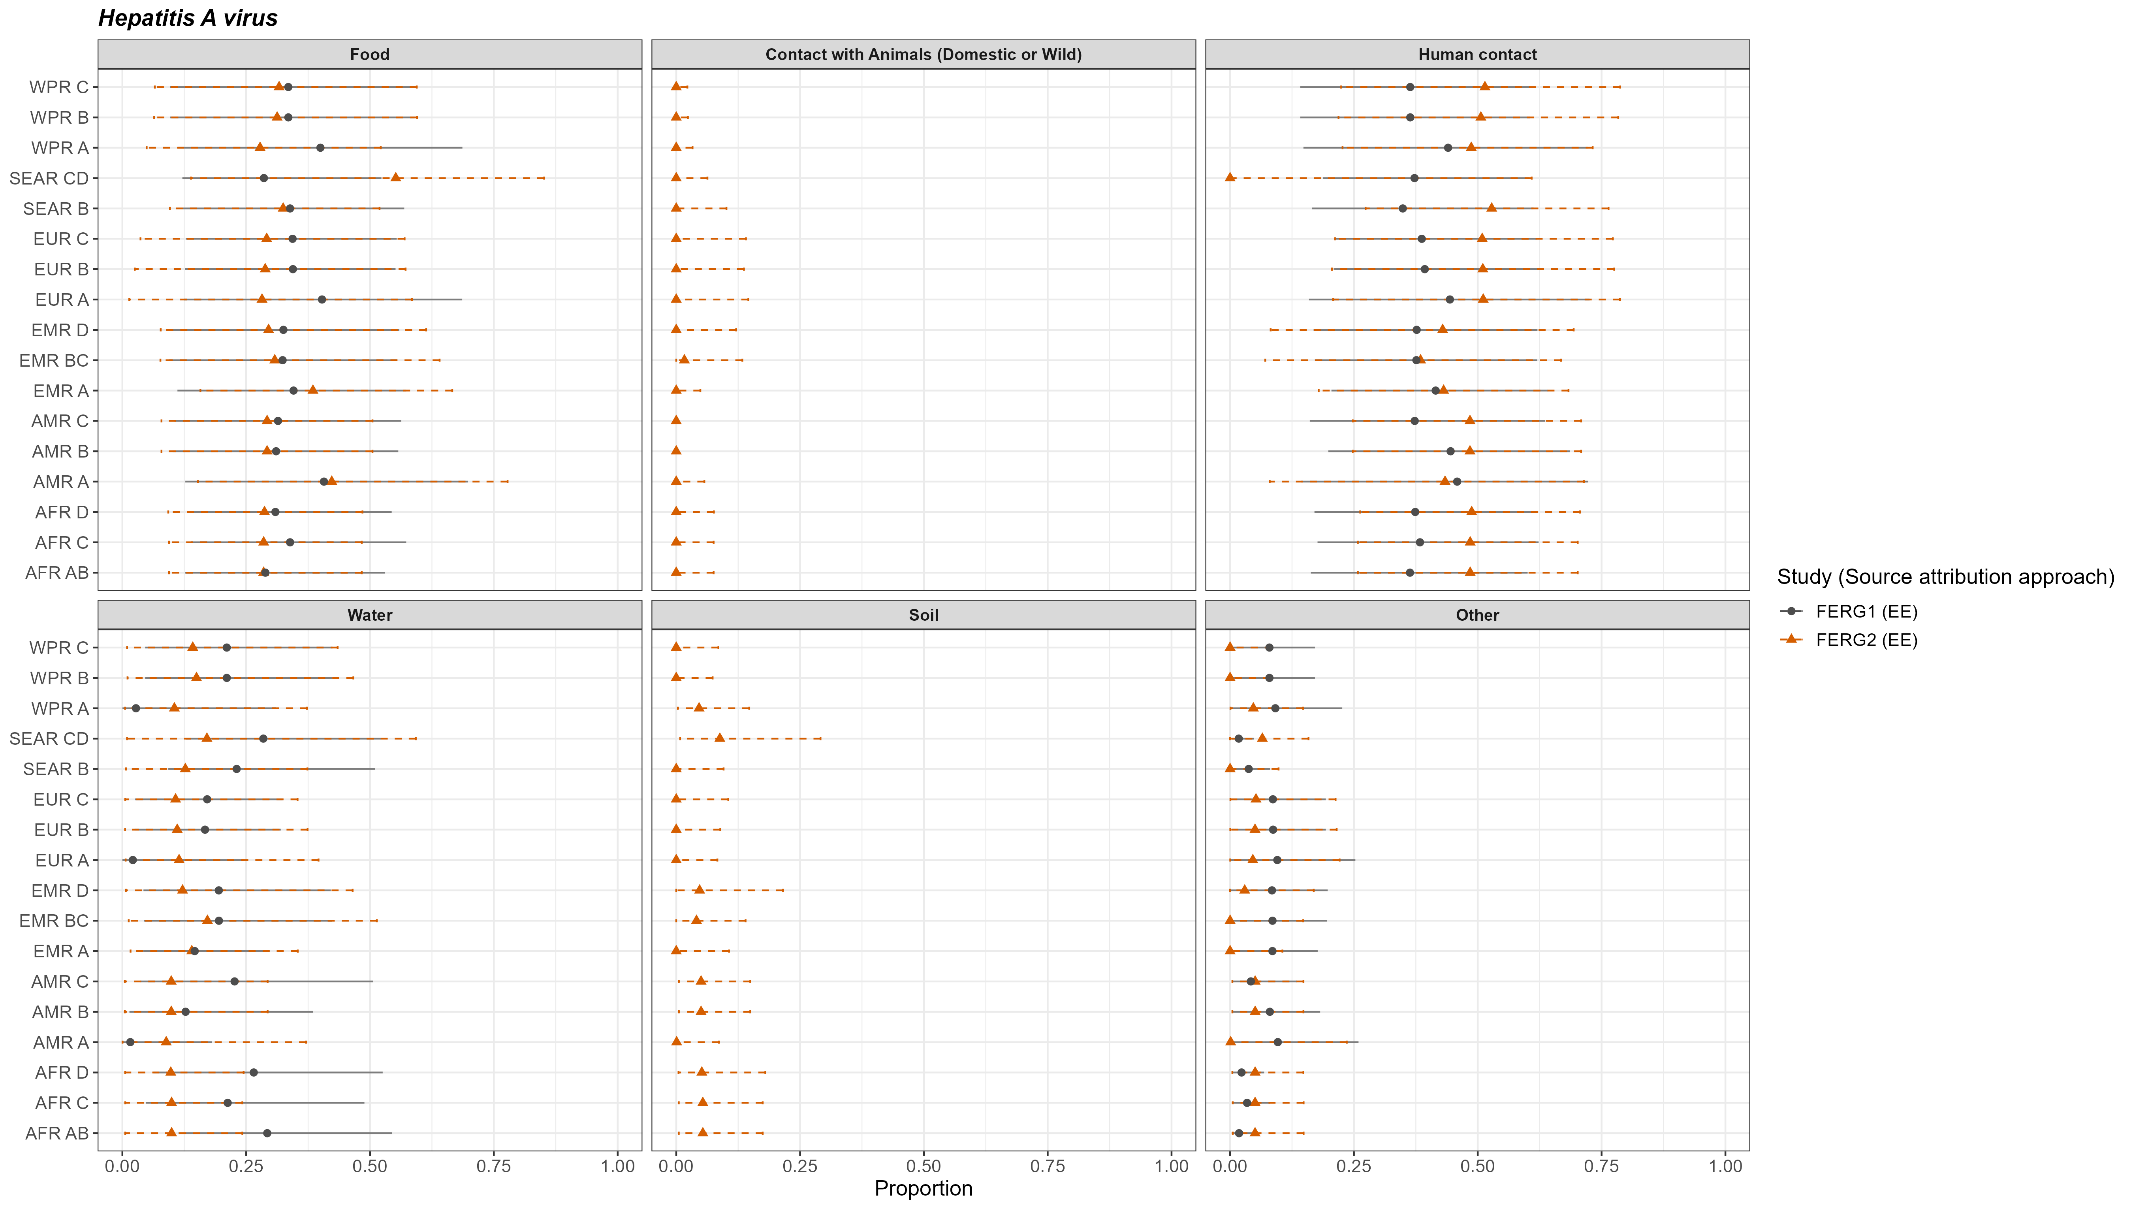


### Supplementary Figure 8. Estimated attribution proportion to main pathways (mean and 95% Confidence Interval) in FERG 2015 (Hald et al., 2016) and FERG 2026 for parasites


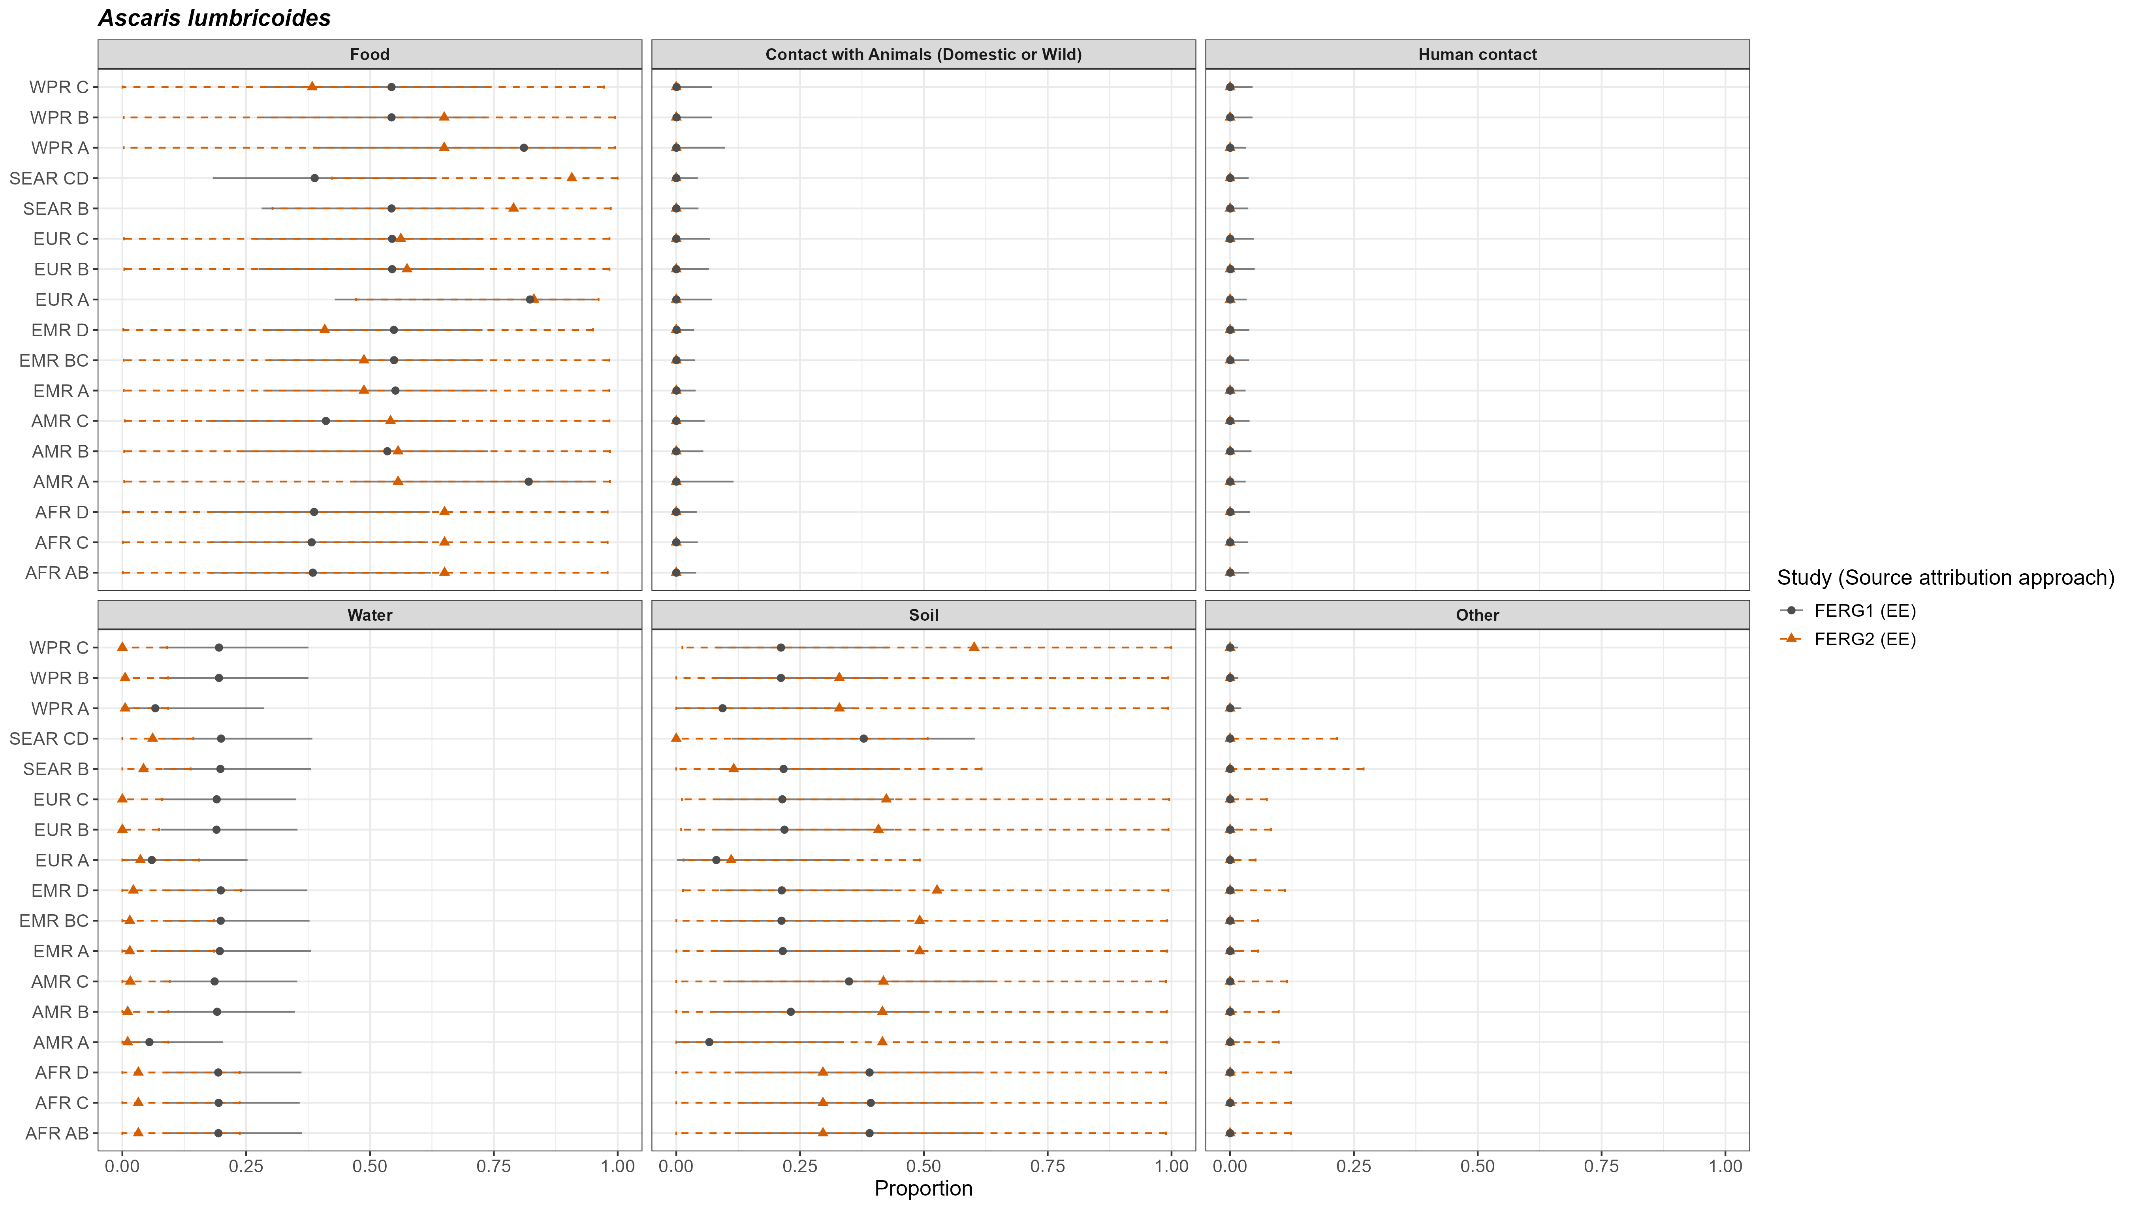


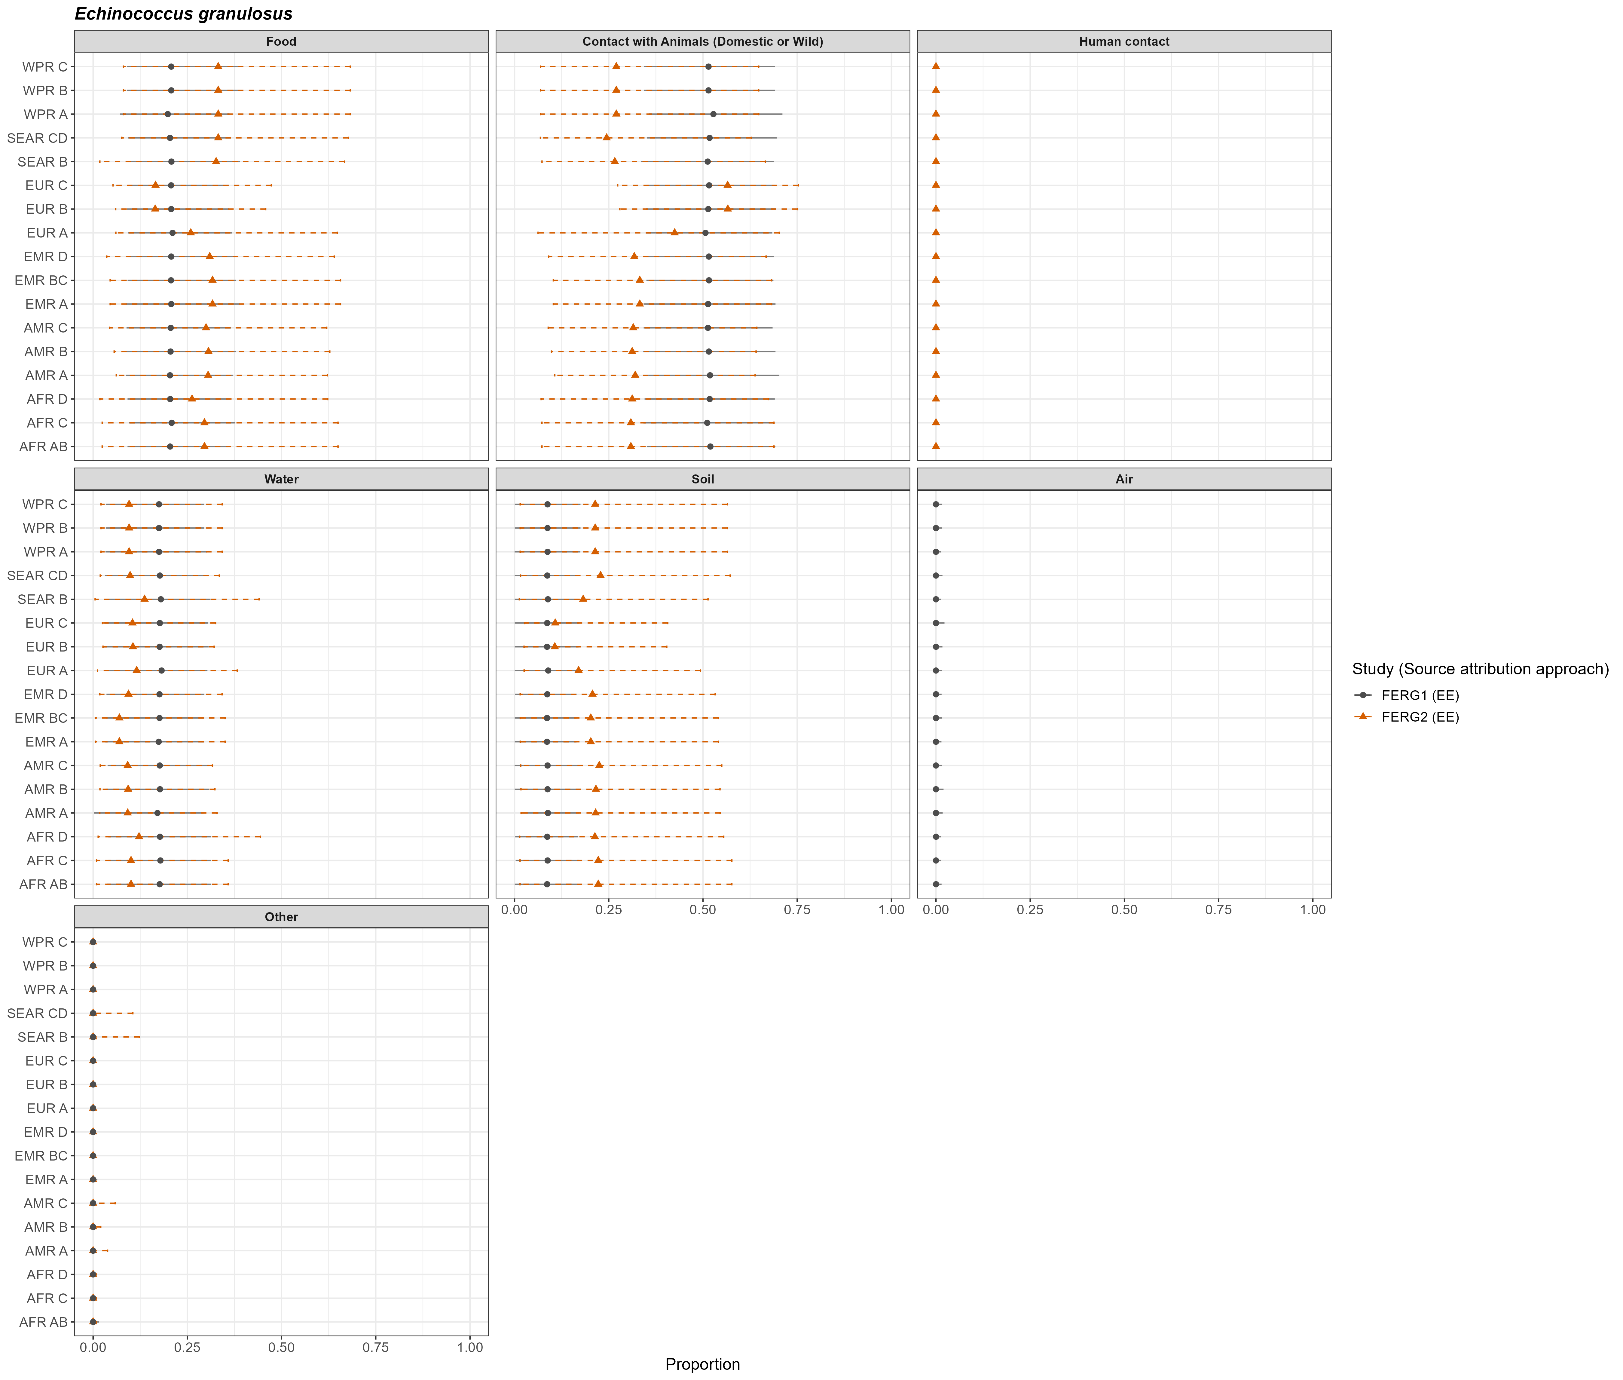


### Supplementary Figure 9. Estimated attribution proportion to main pathways in FERG 2015 (median and 95% Confidence Interval) (Hald et al., 2016) and FERG 2026 (mean and 95% Confidence Interval) for lead


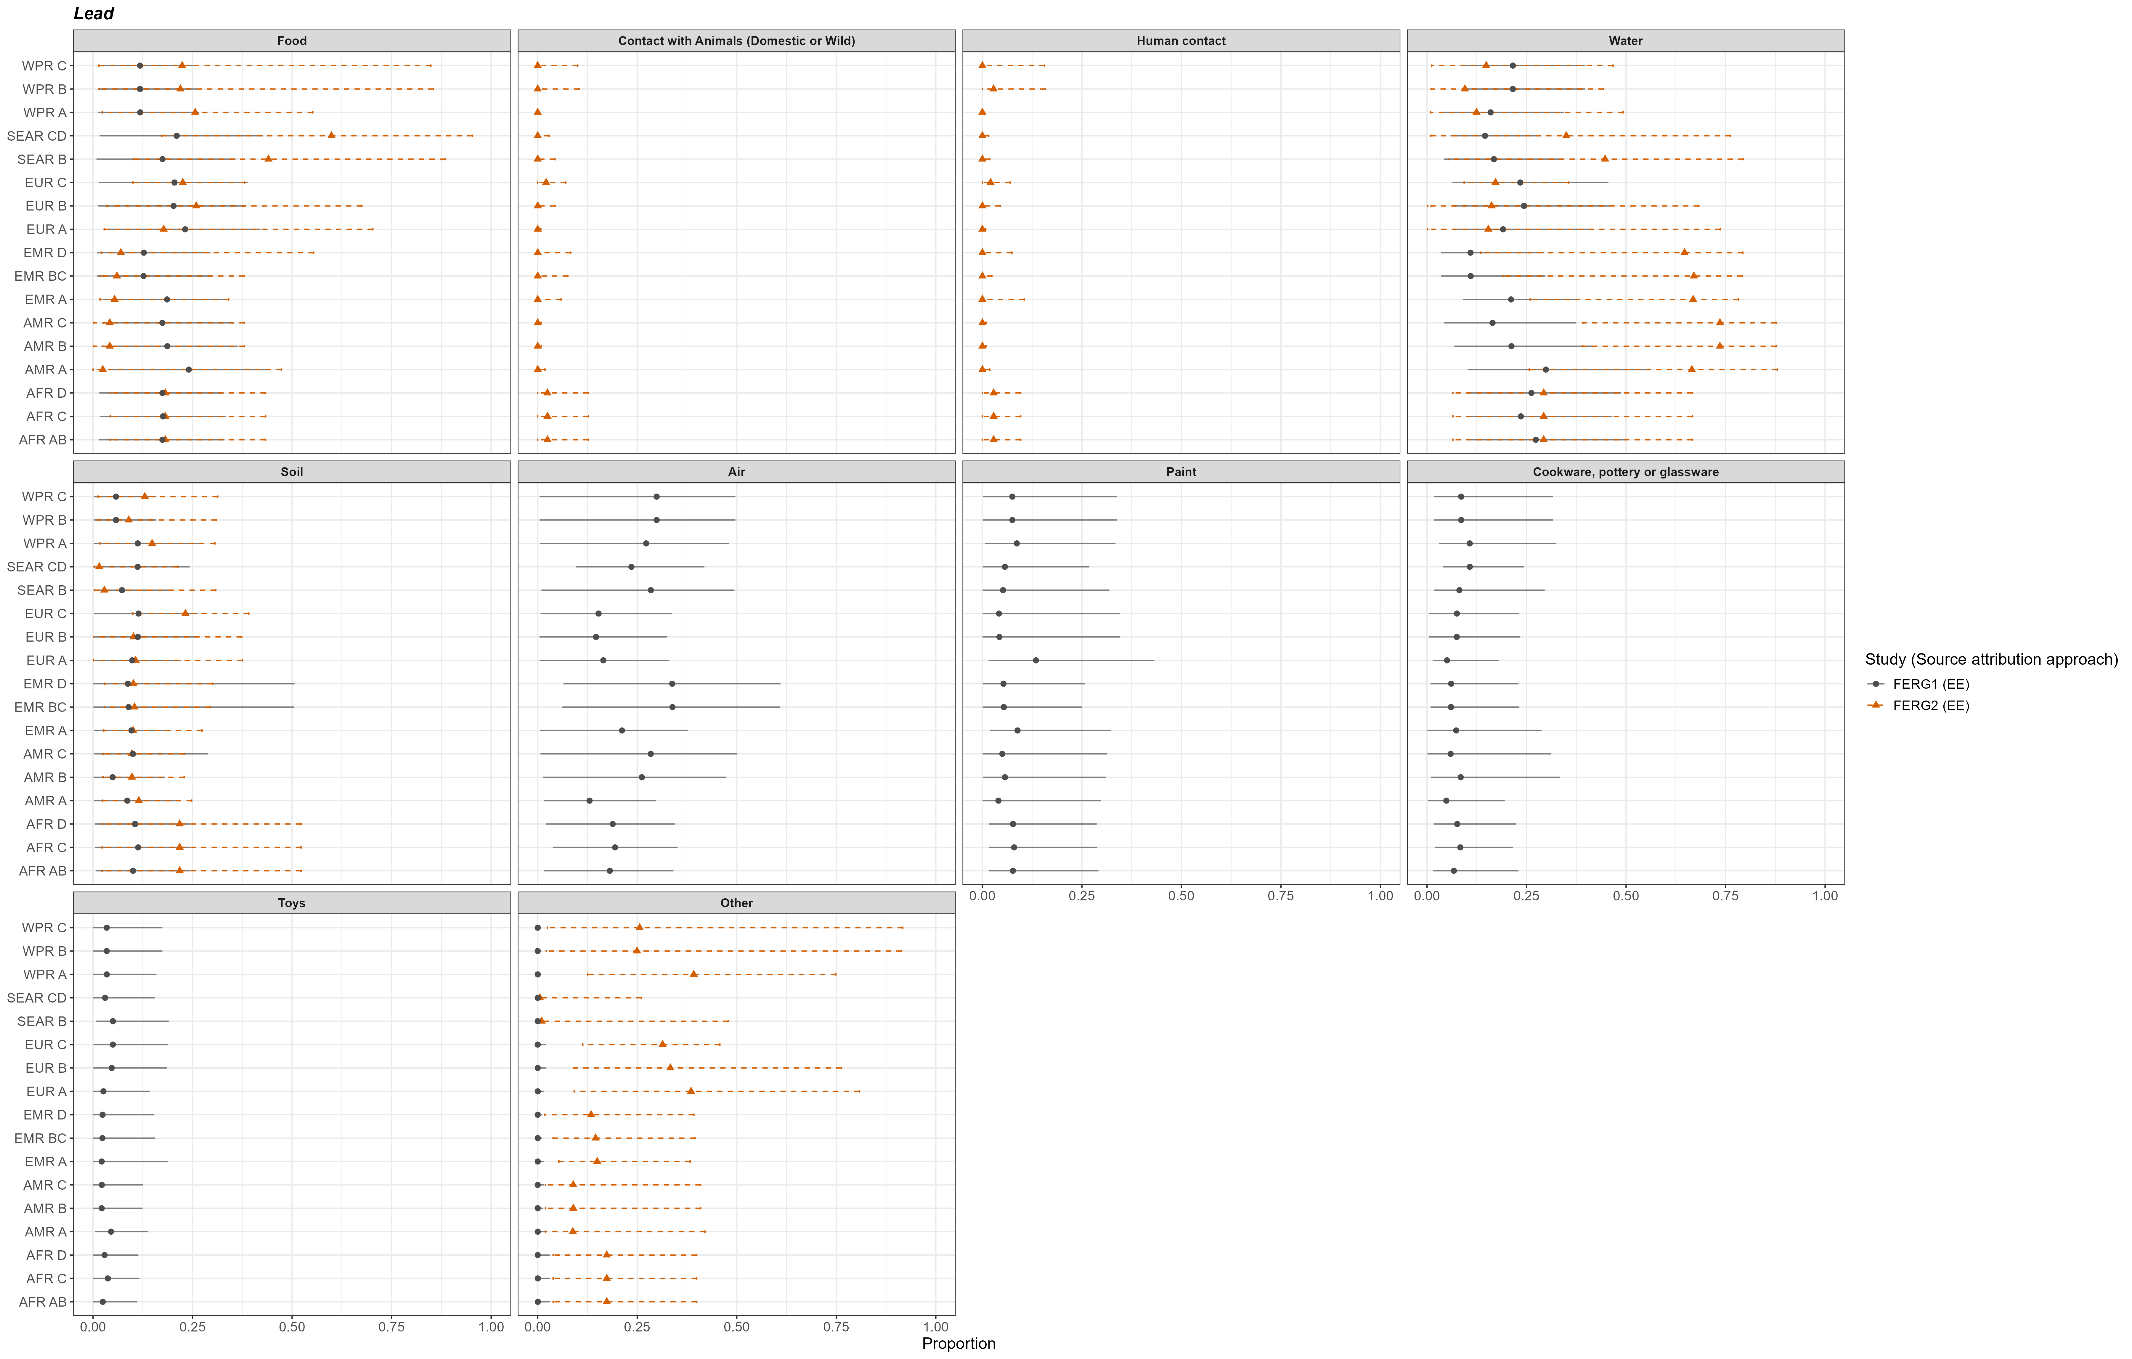


### Supplementary Figures 10. Estimated attribution to food categories in FERG 2026 and estimated in previous source attribution studies (mean and 95% Confidence Intervals).

Estimates extracted from Davydova et al., 20251. Data is available through the Zenodo repository https://doi.org/10.5281/zenodo.14720777 under the Creative Commons Attribution 4.0 International license.


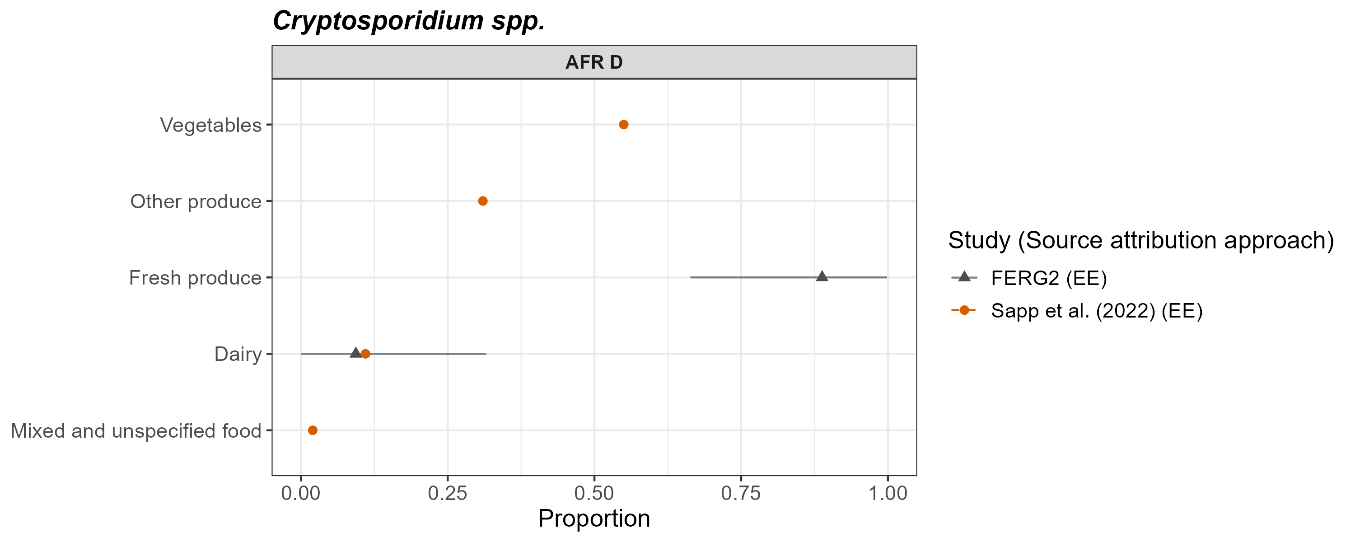


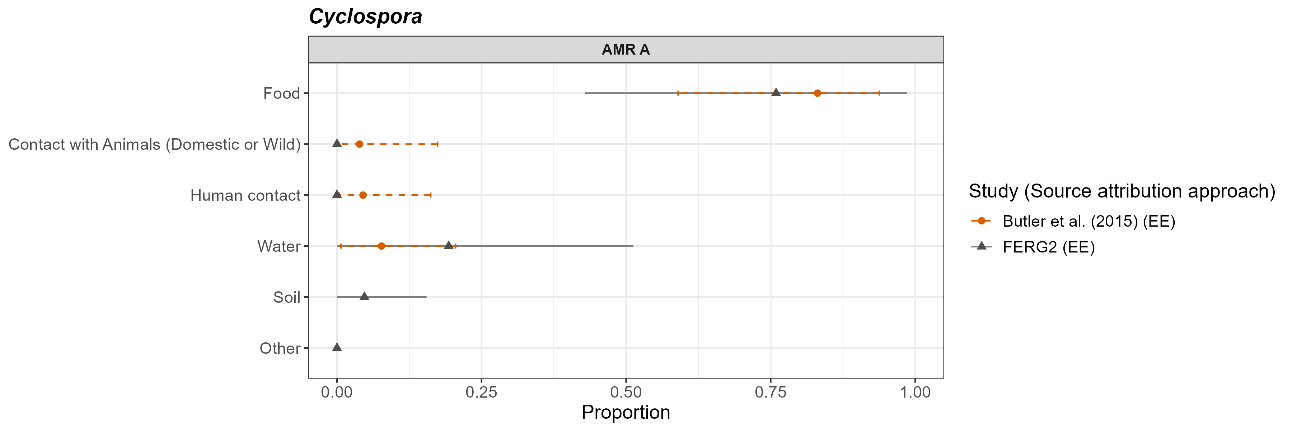


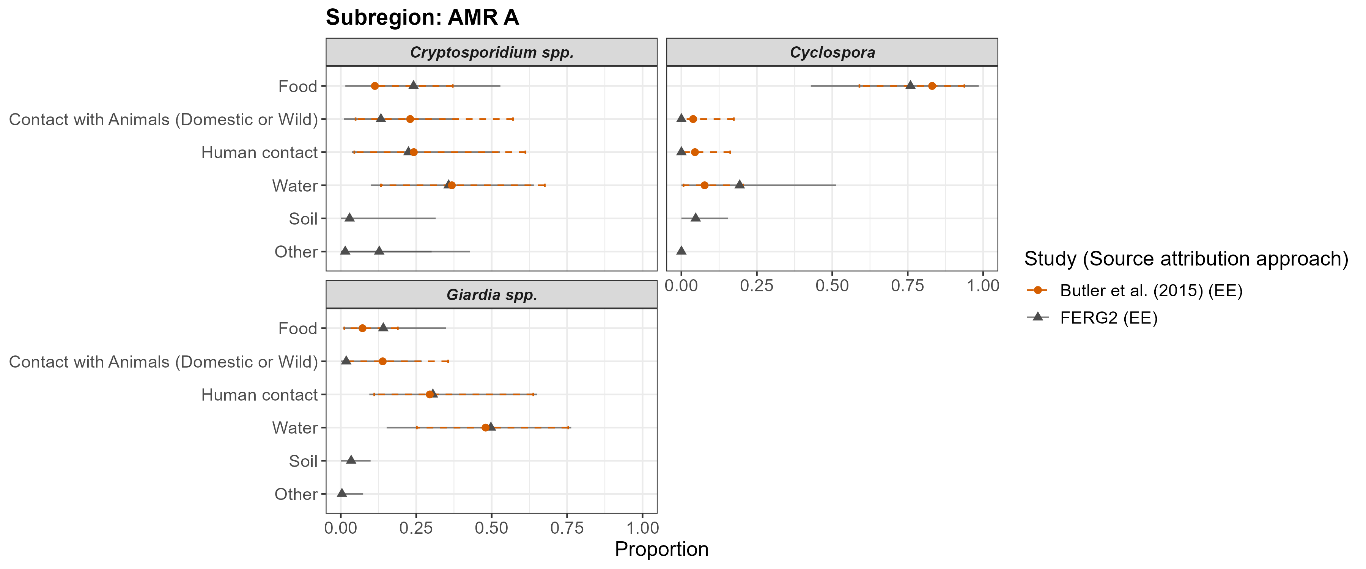


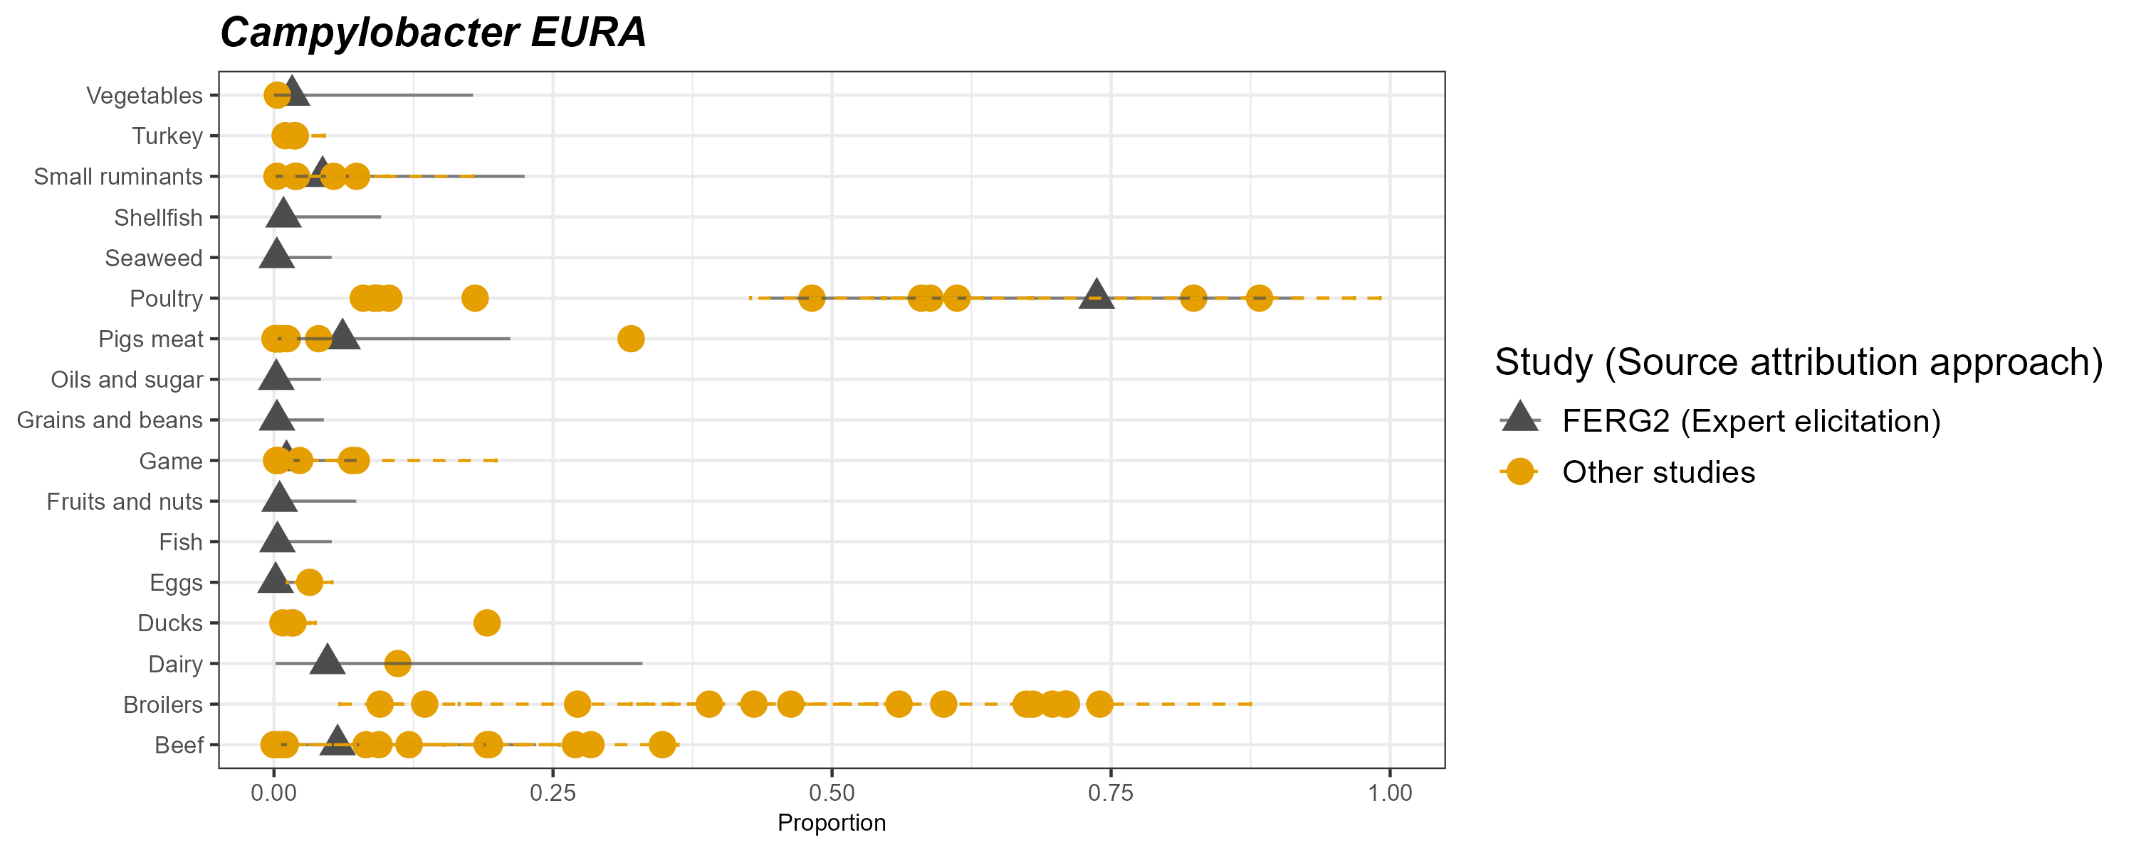

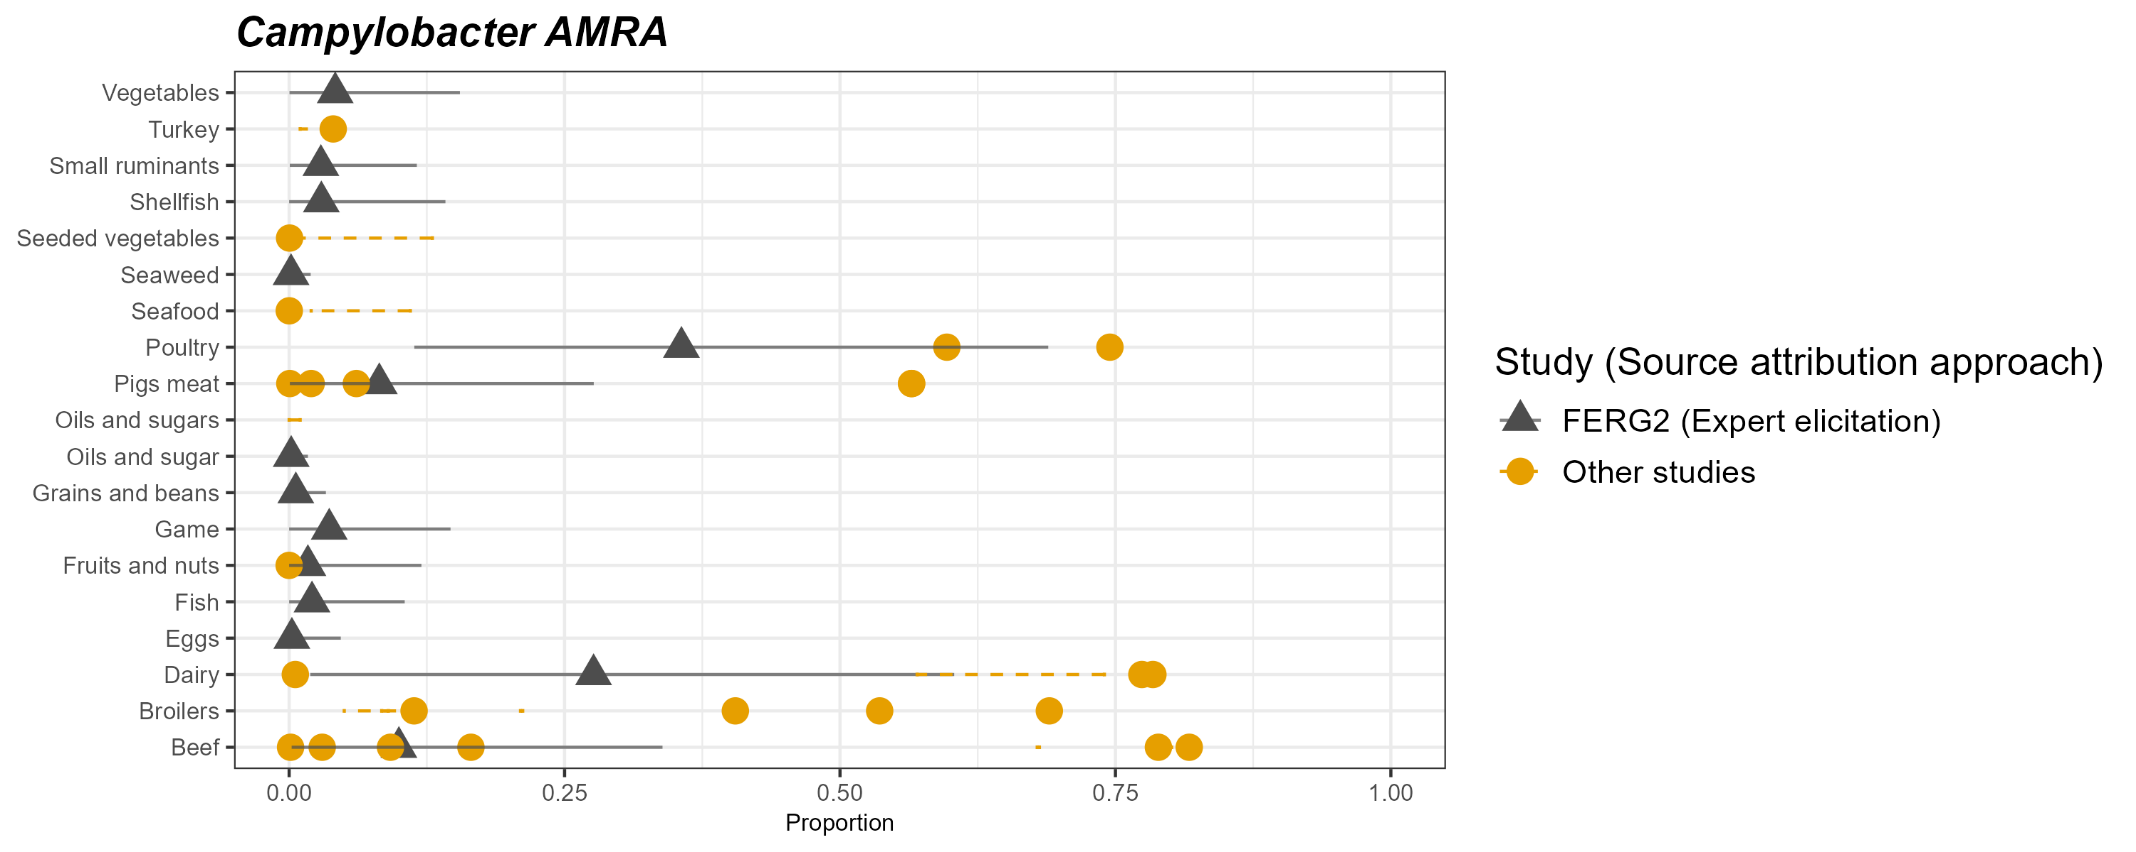

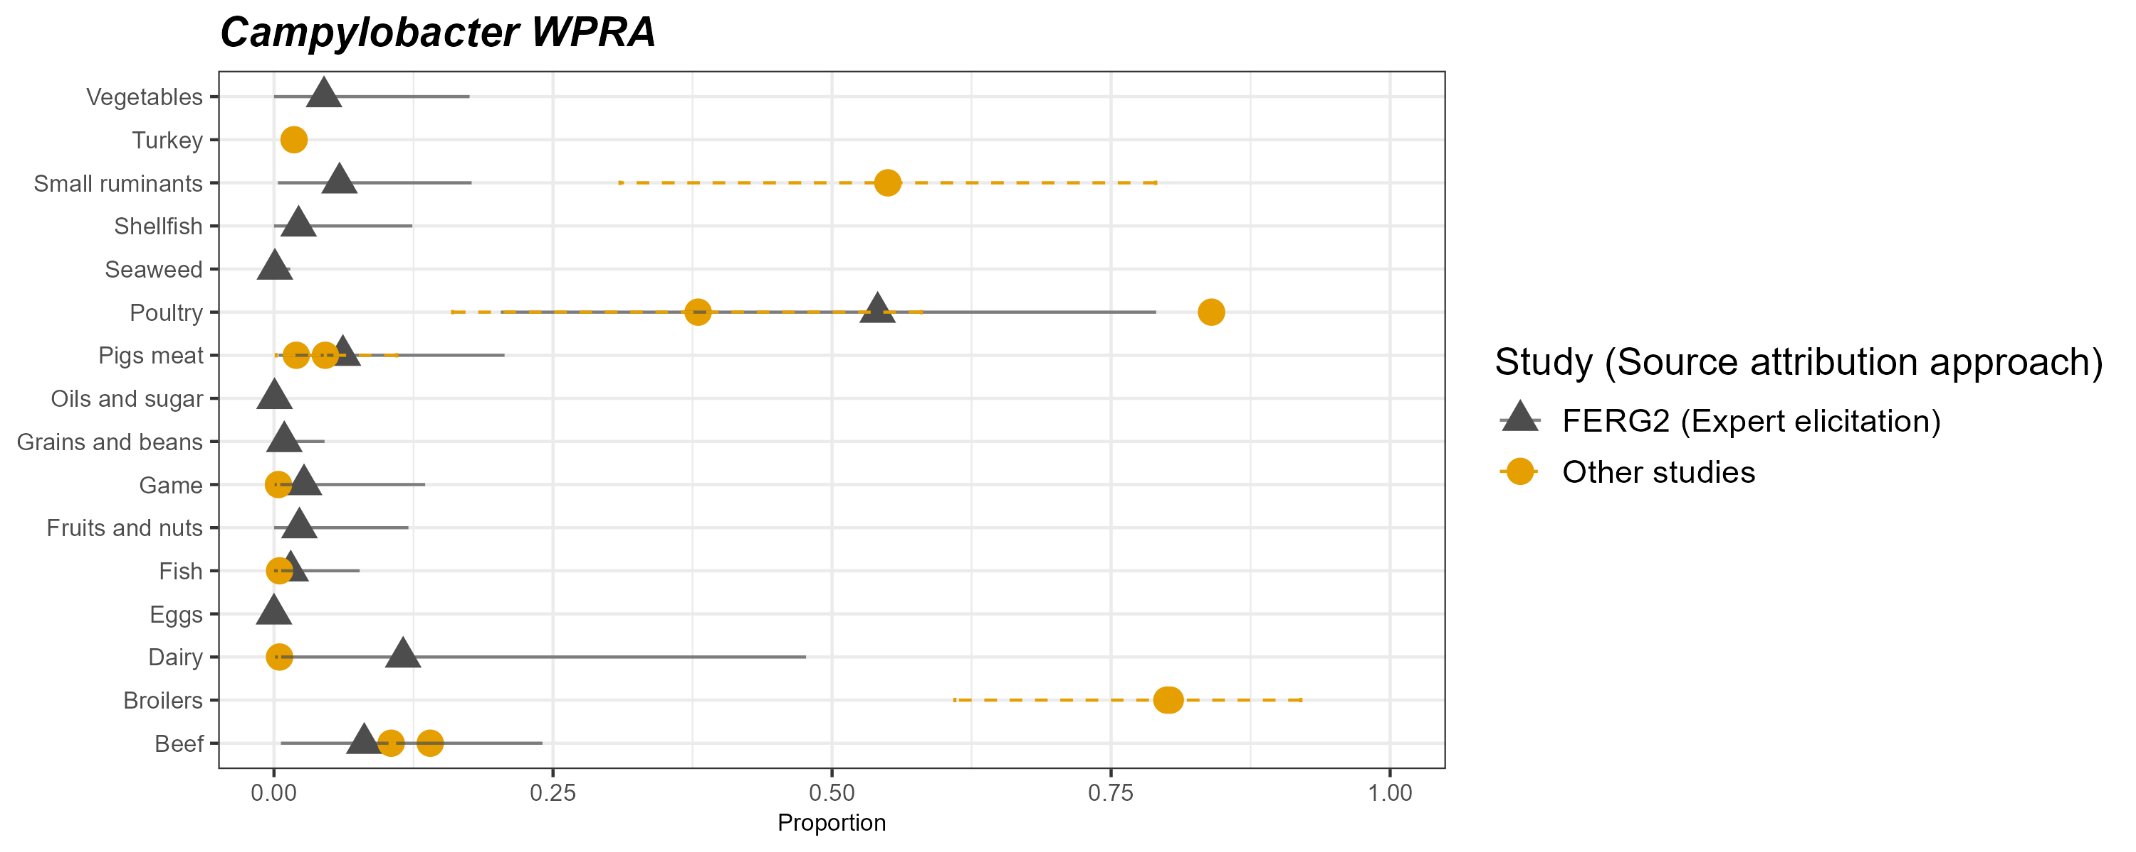


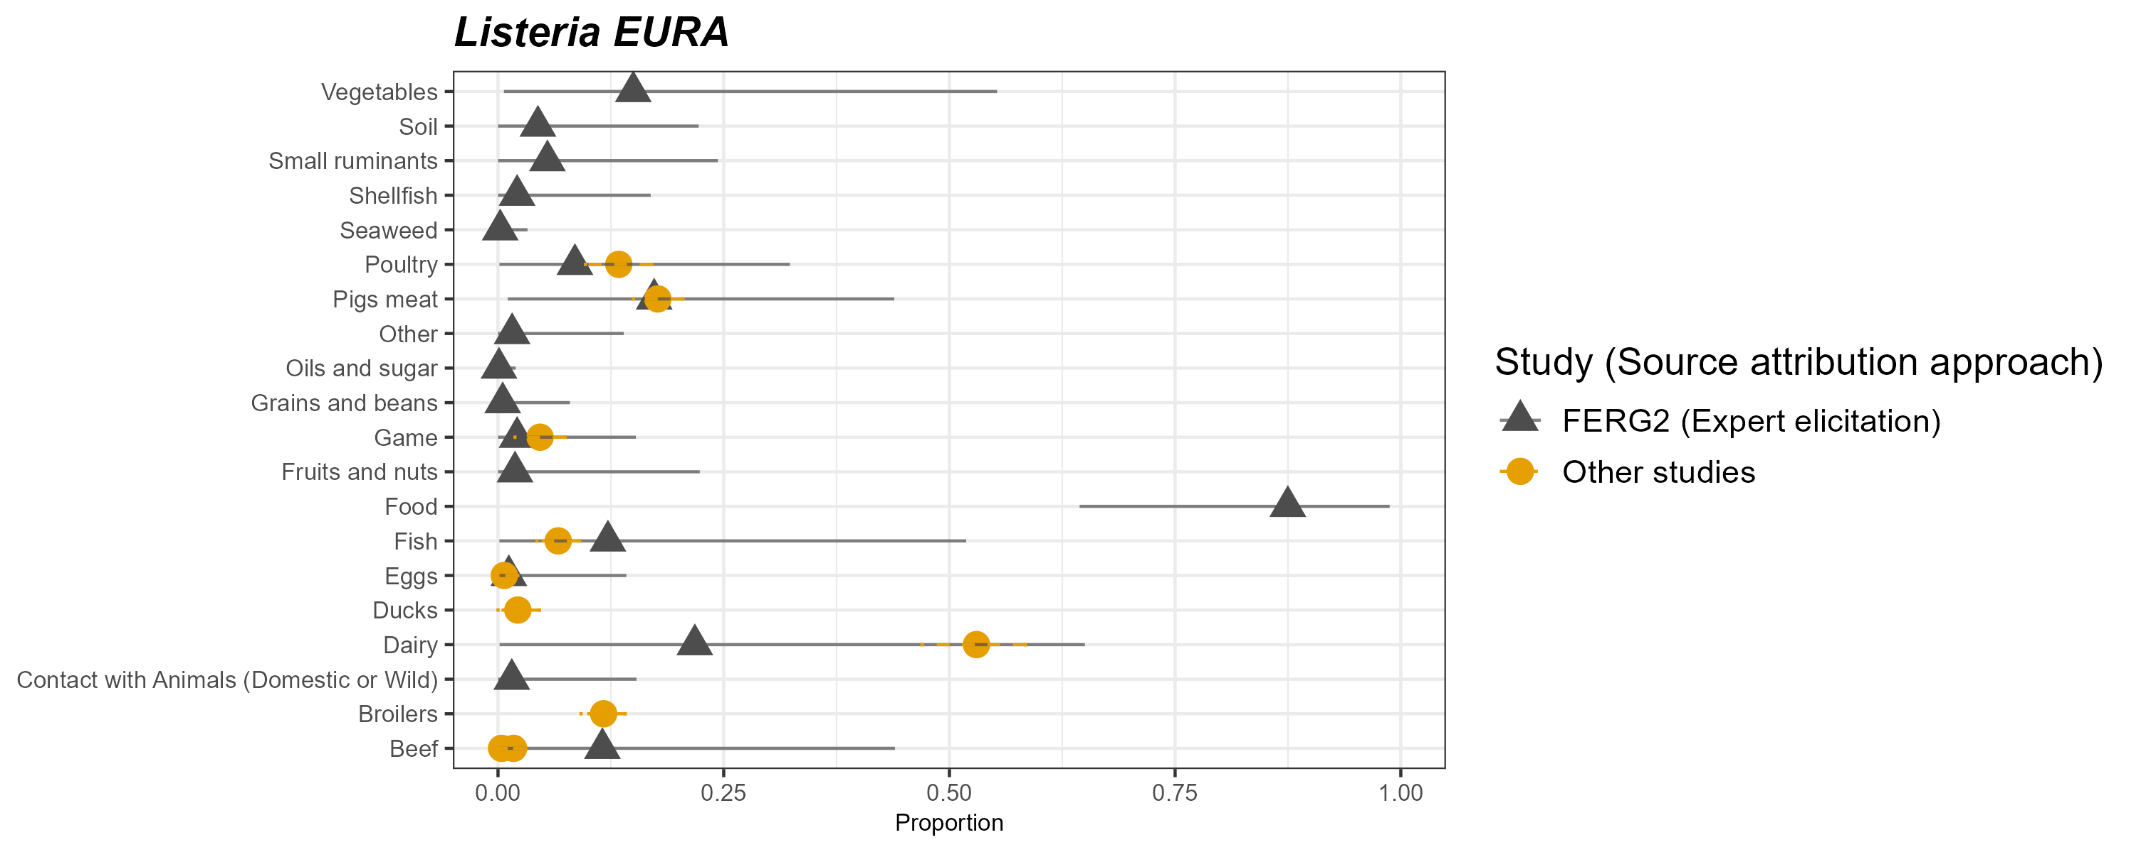

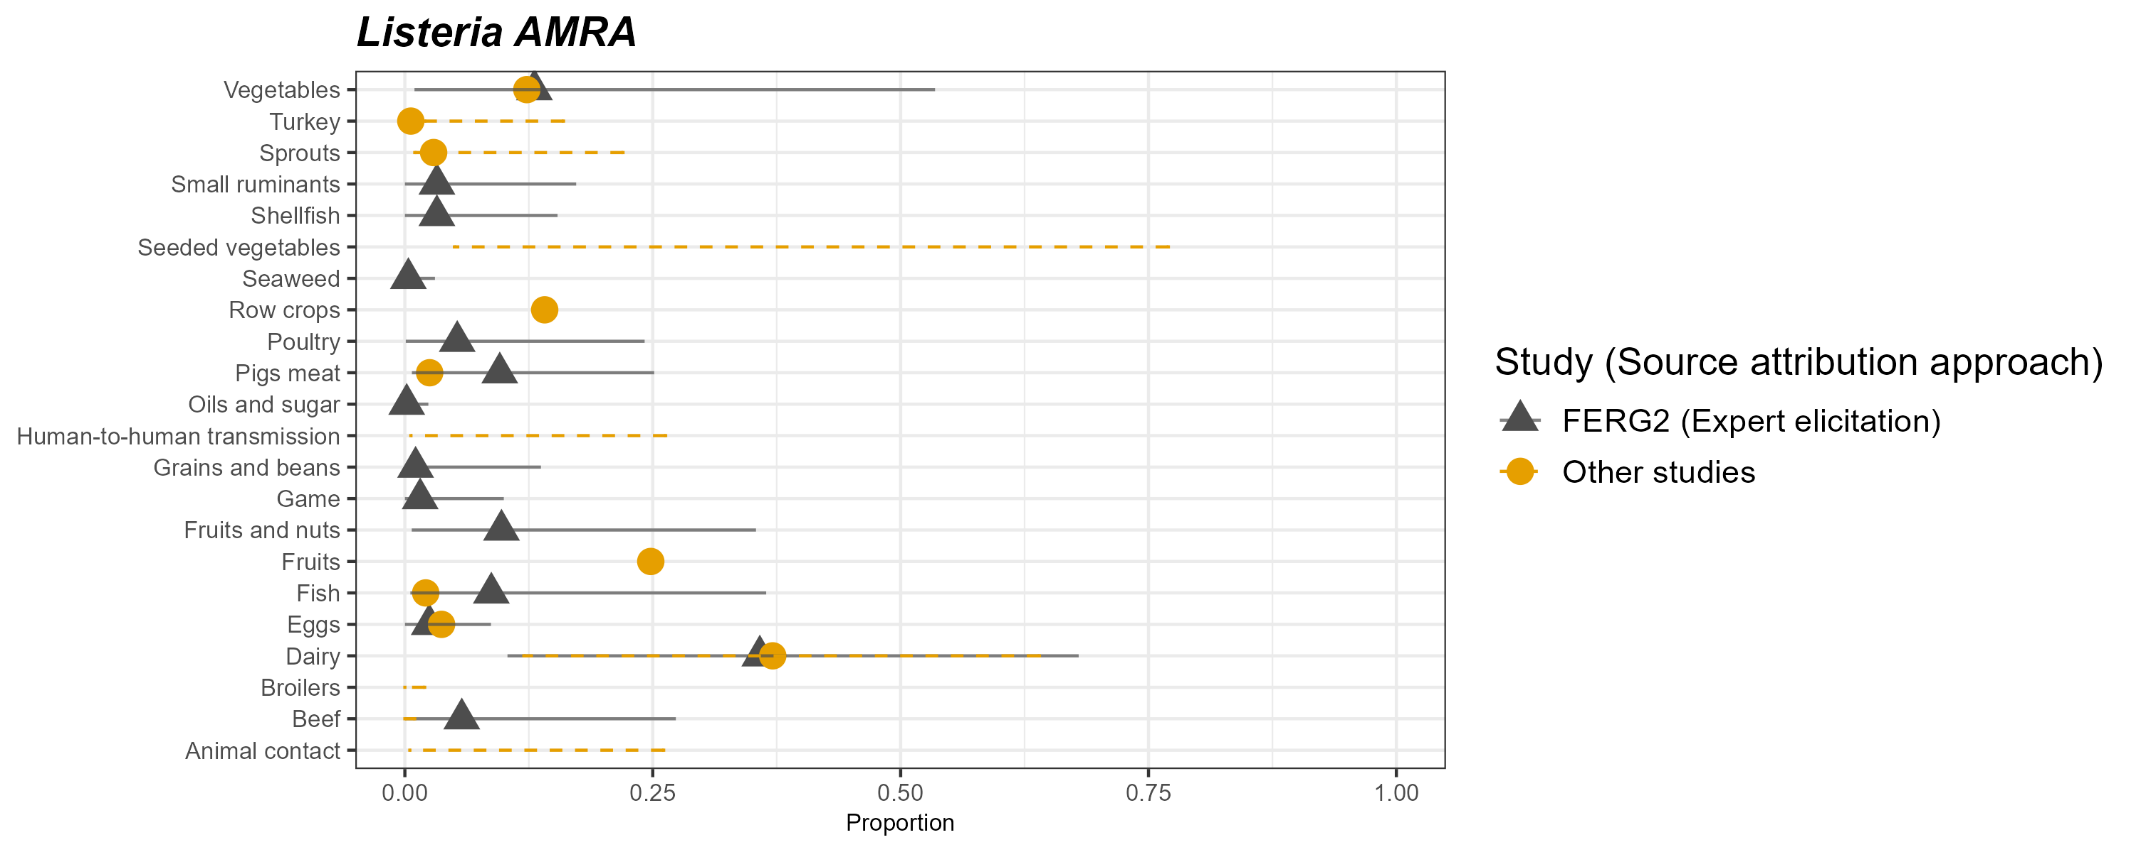

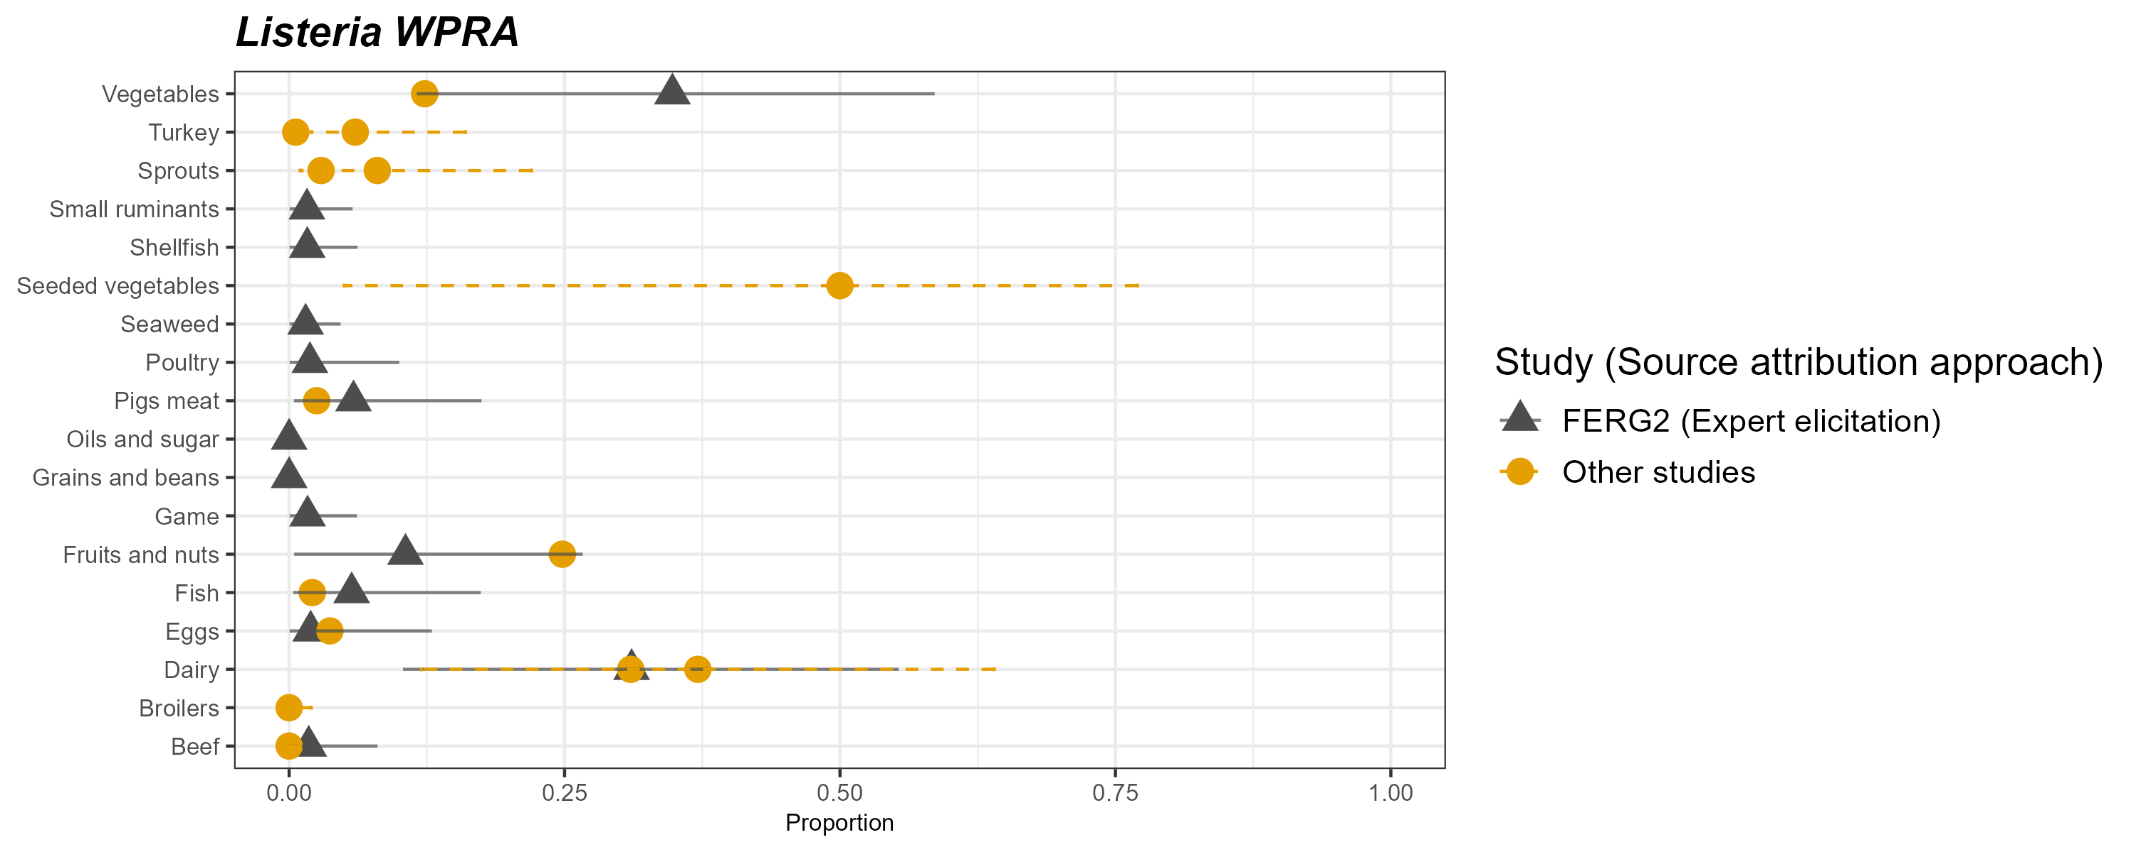


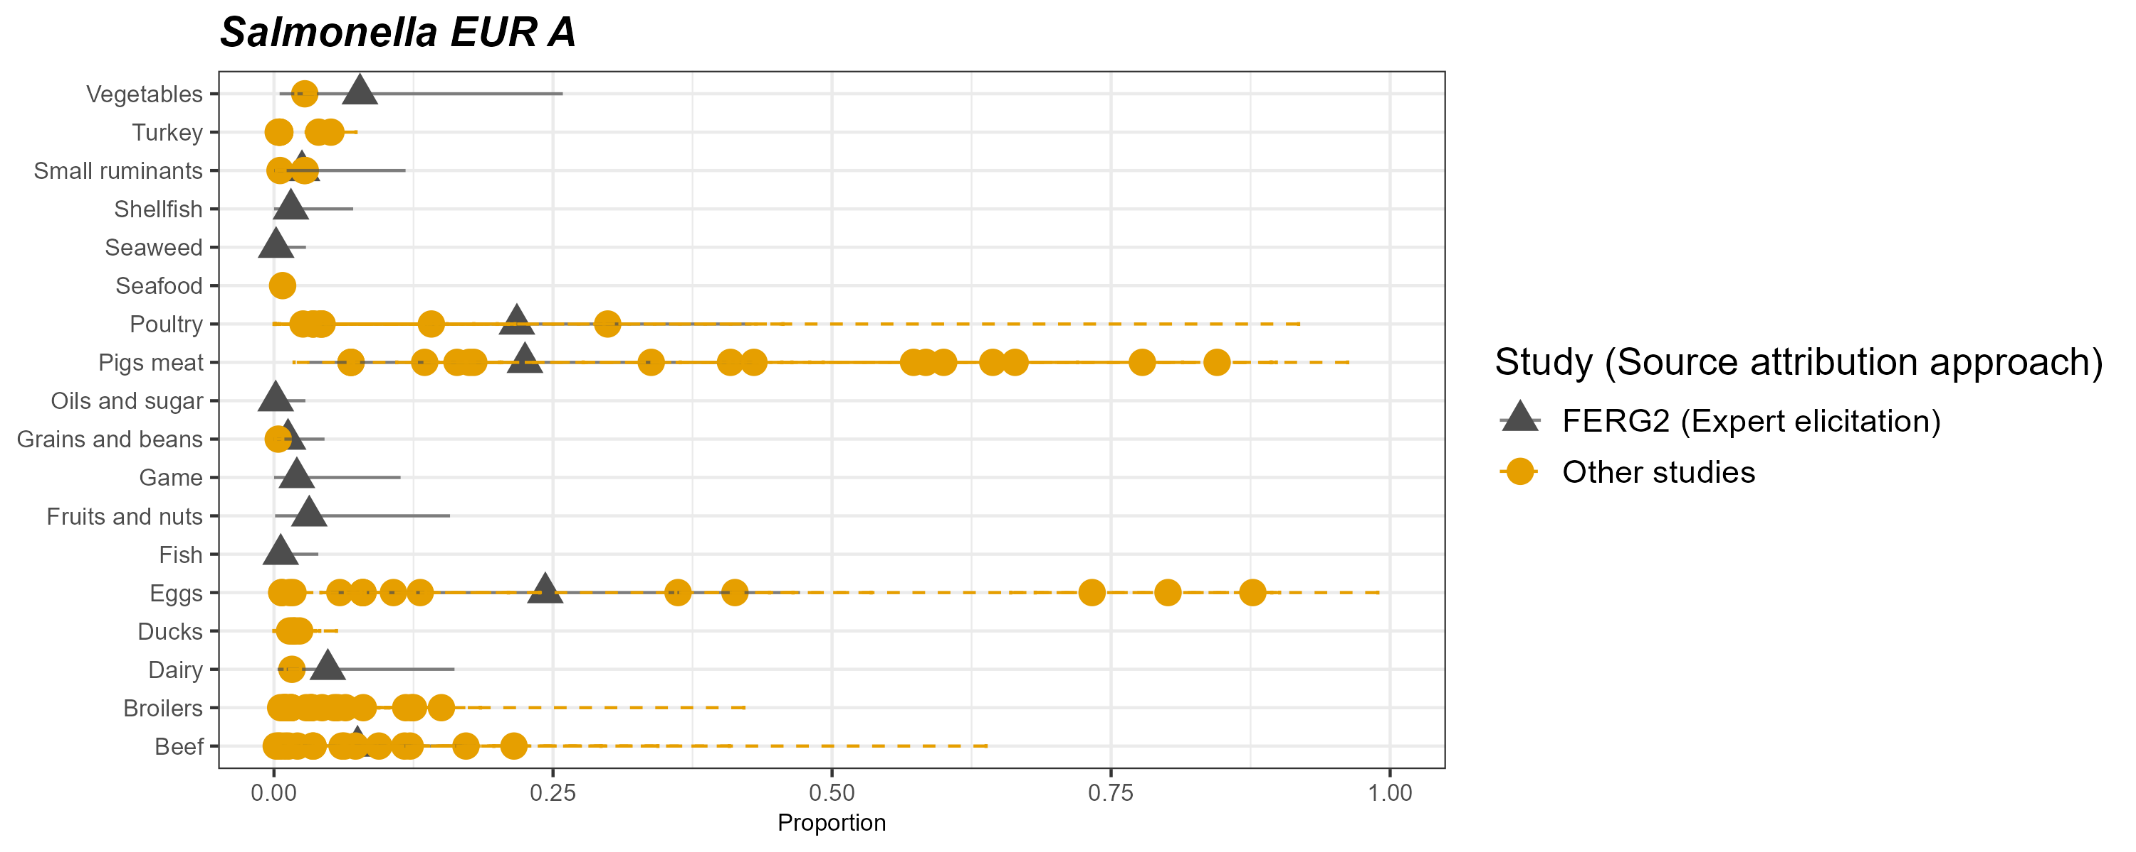

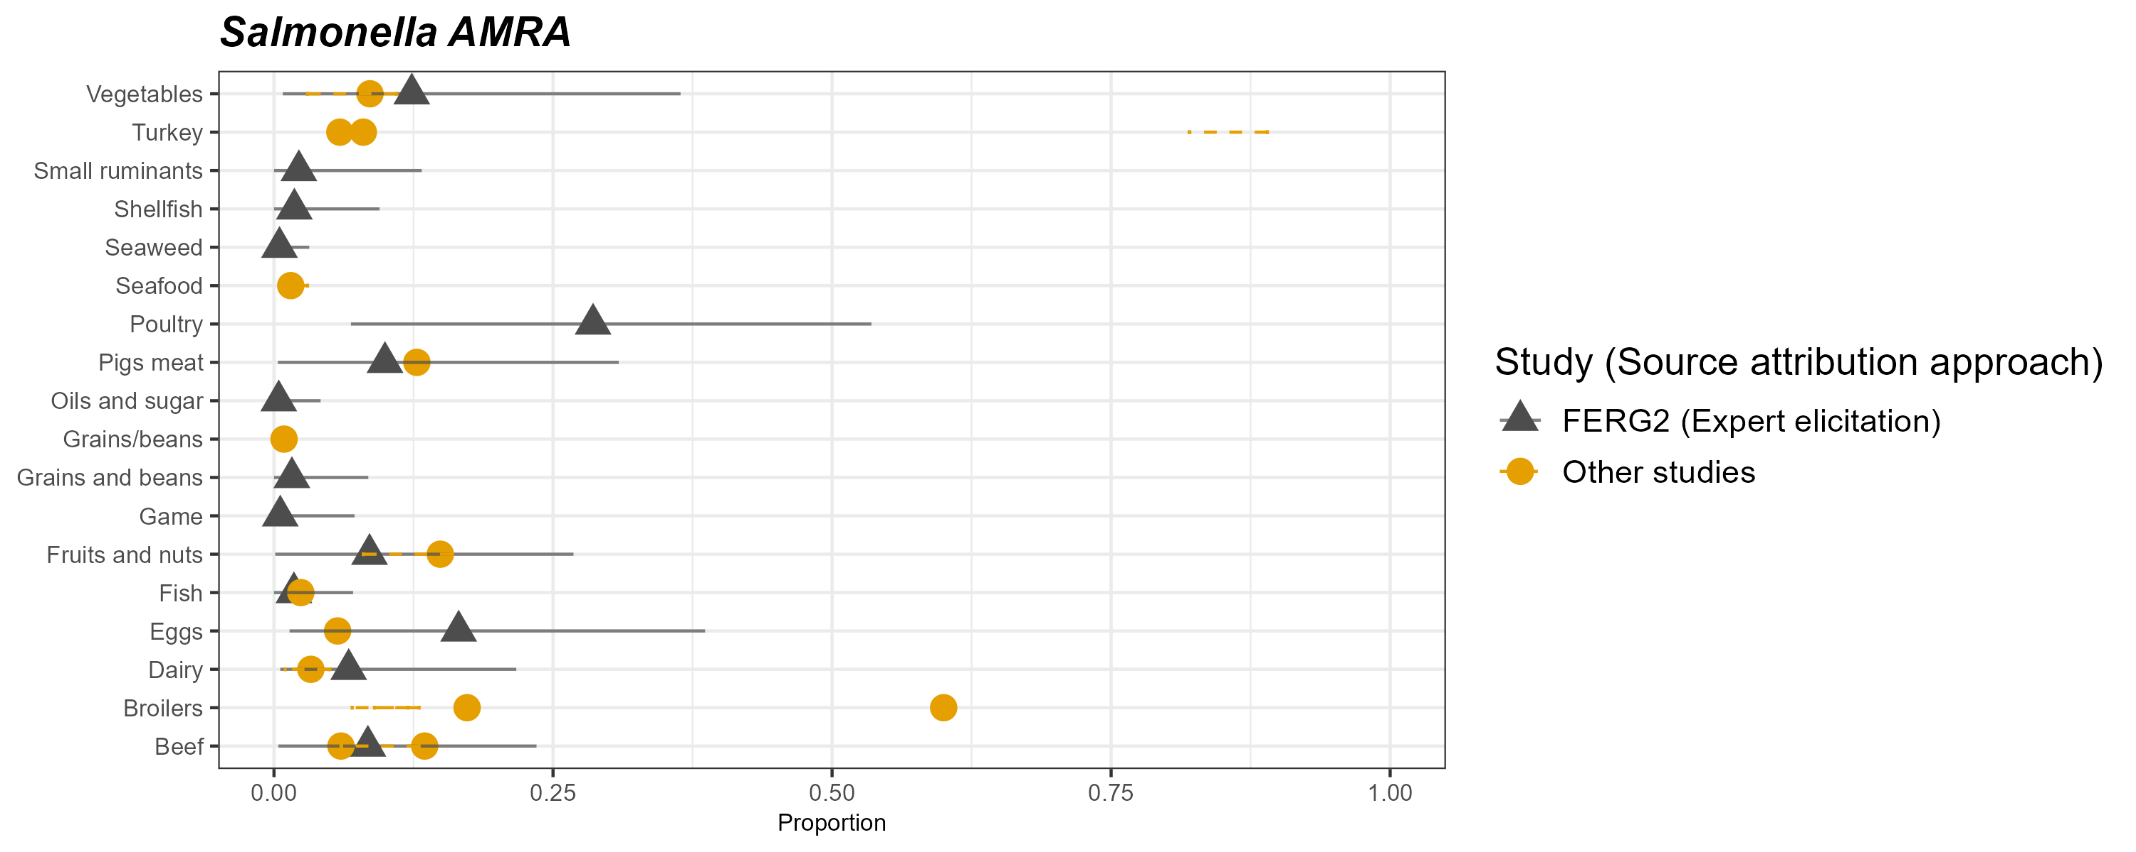

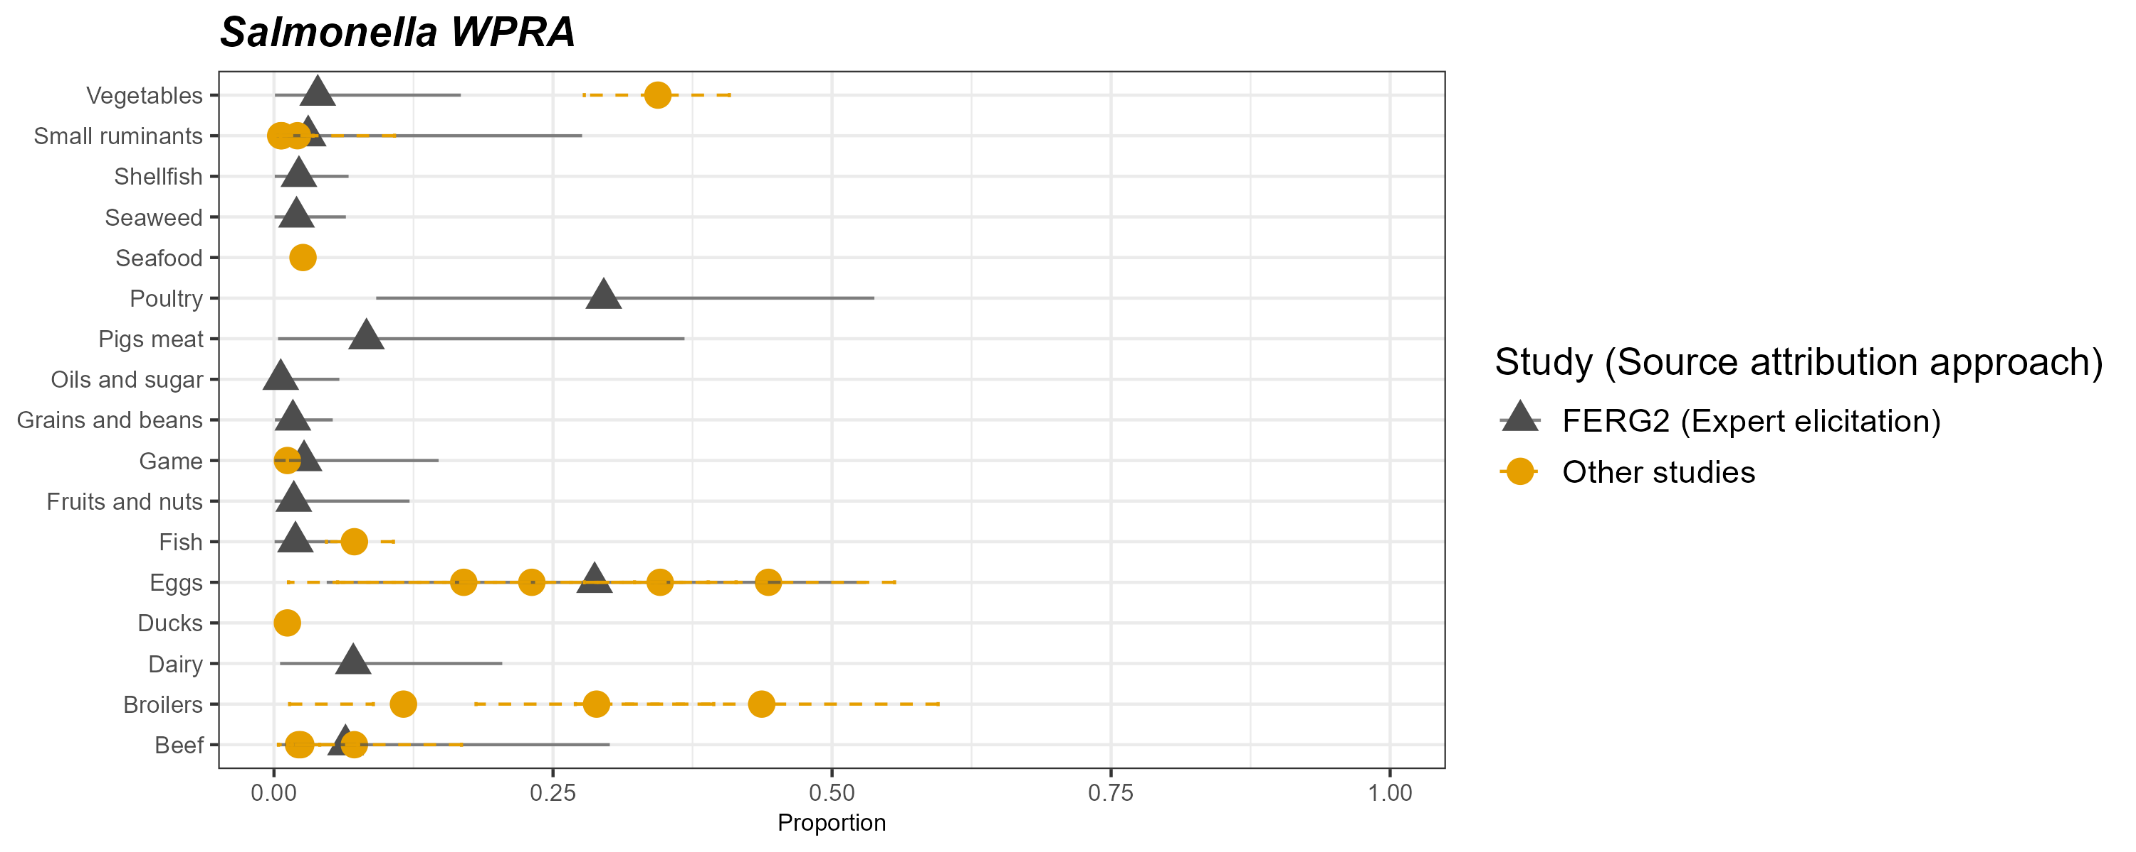


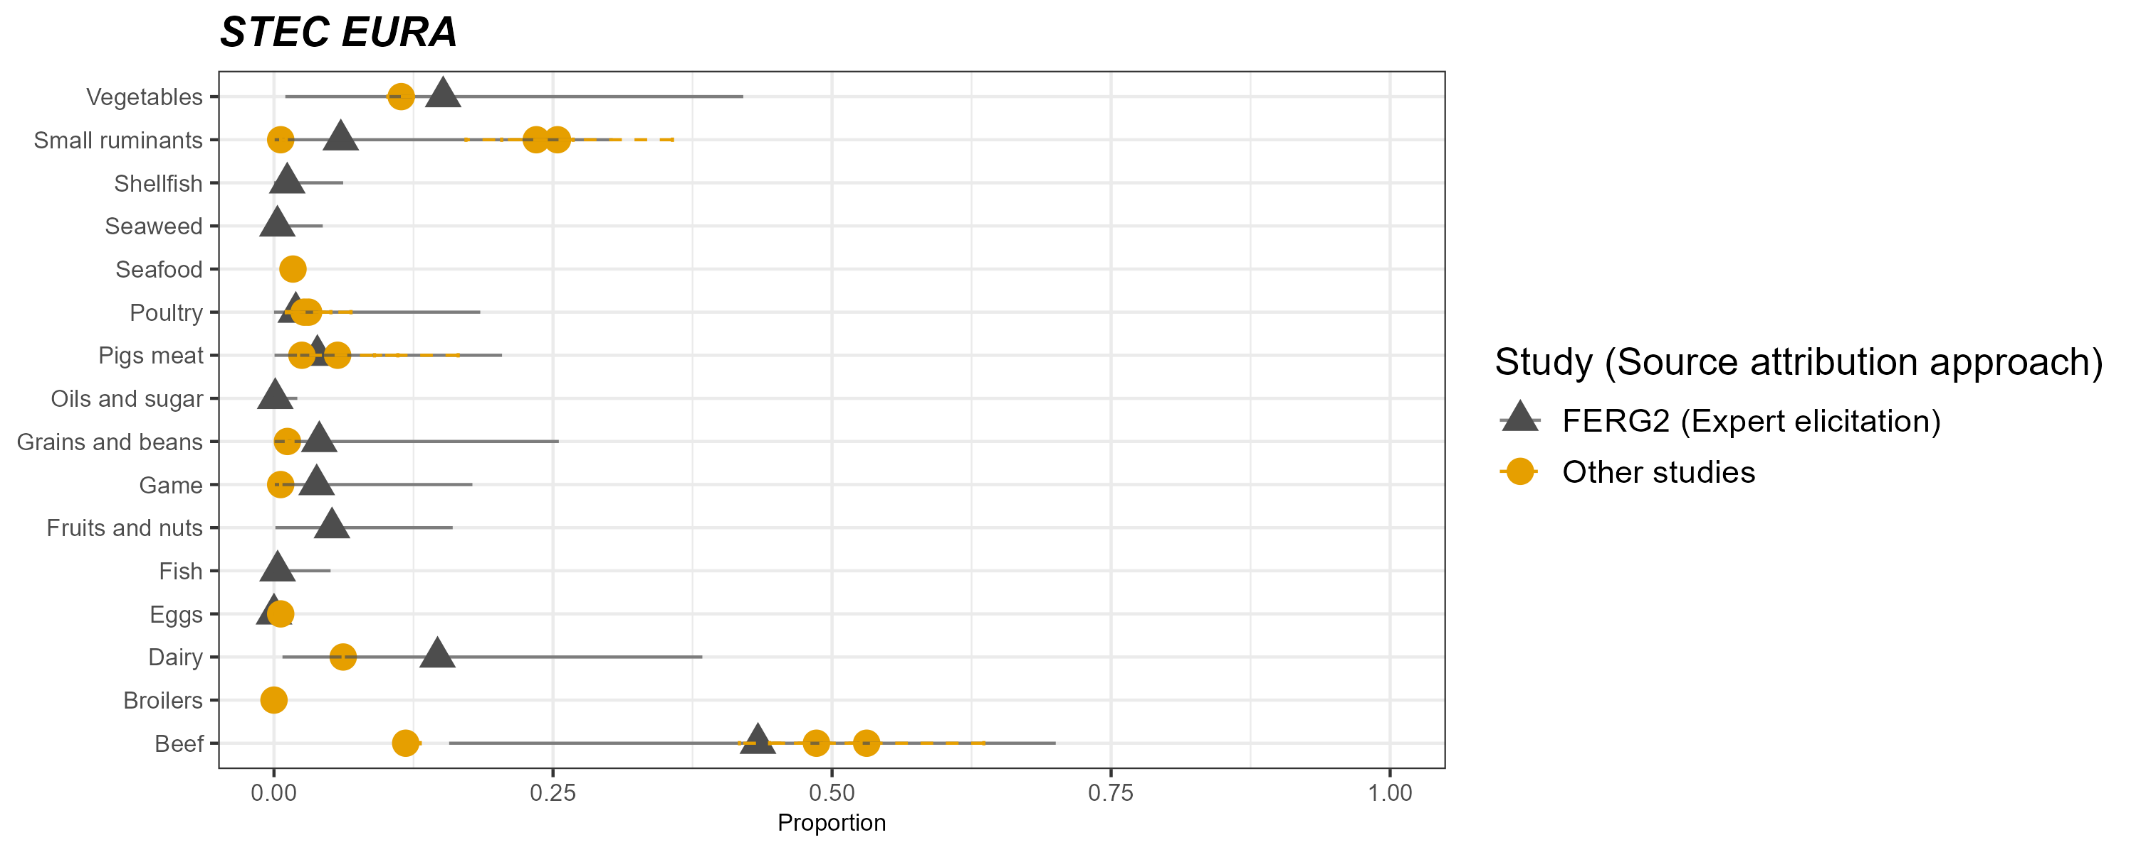

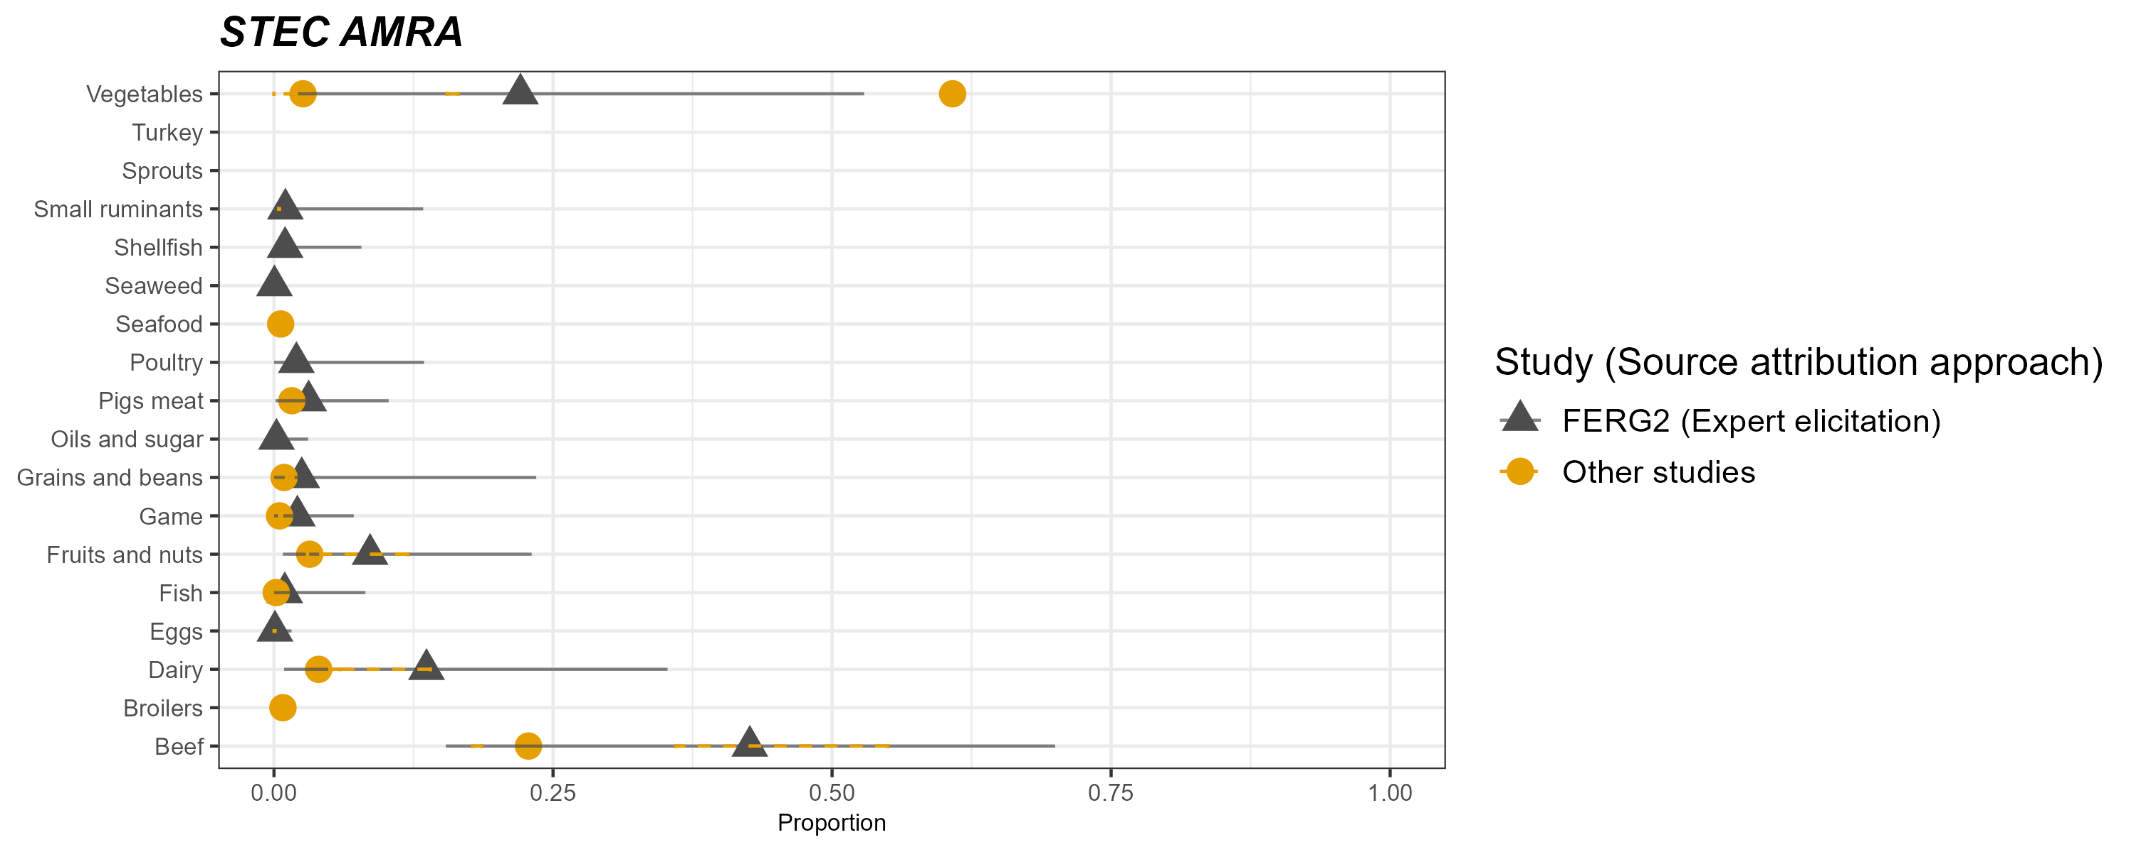

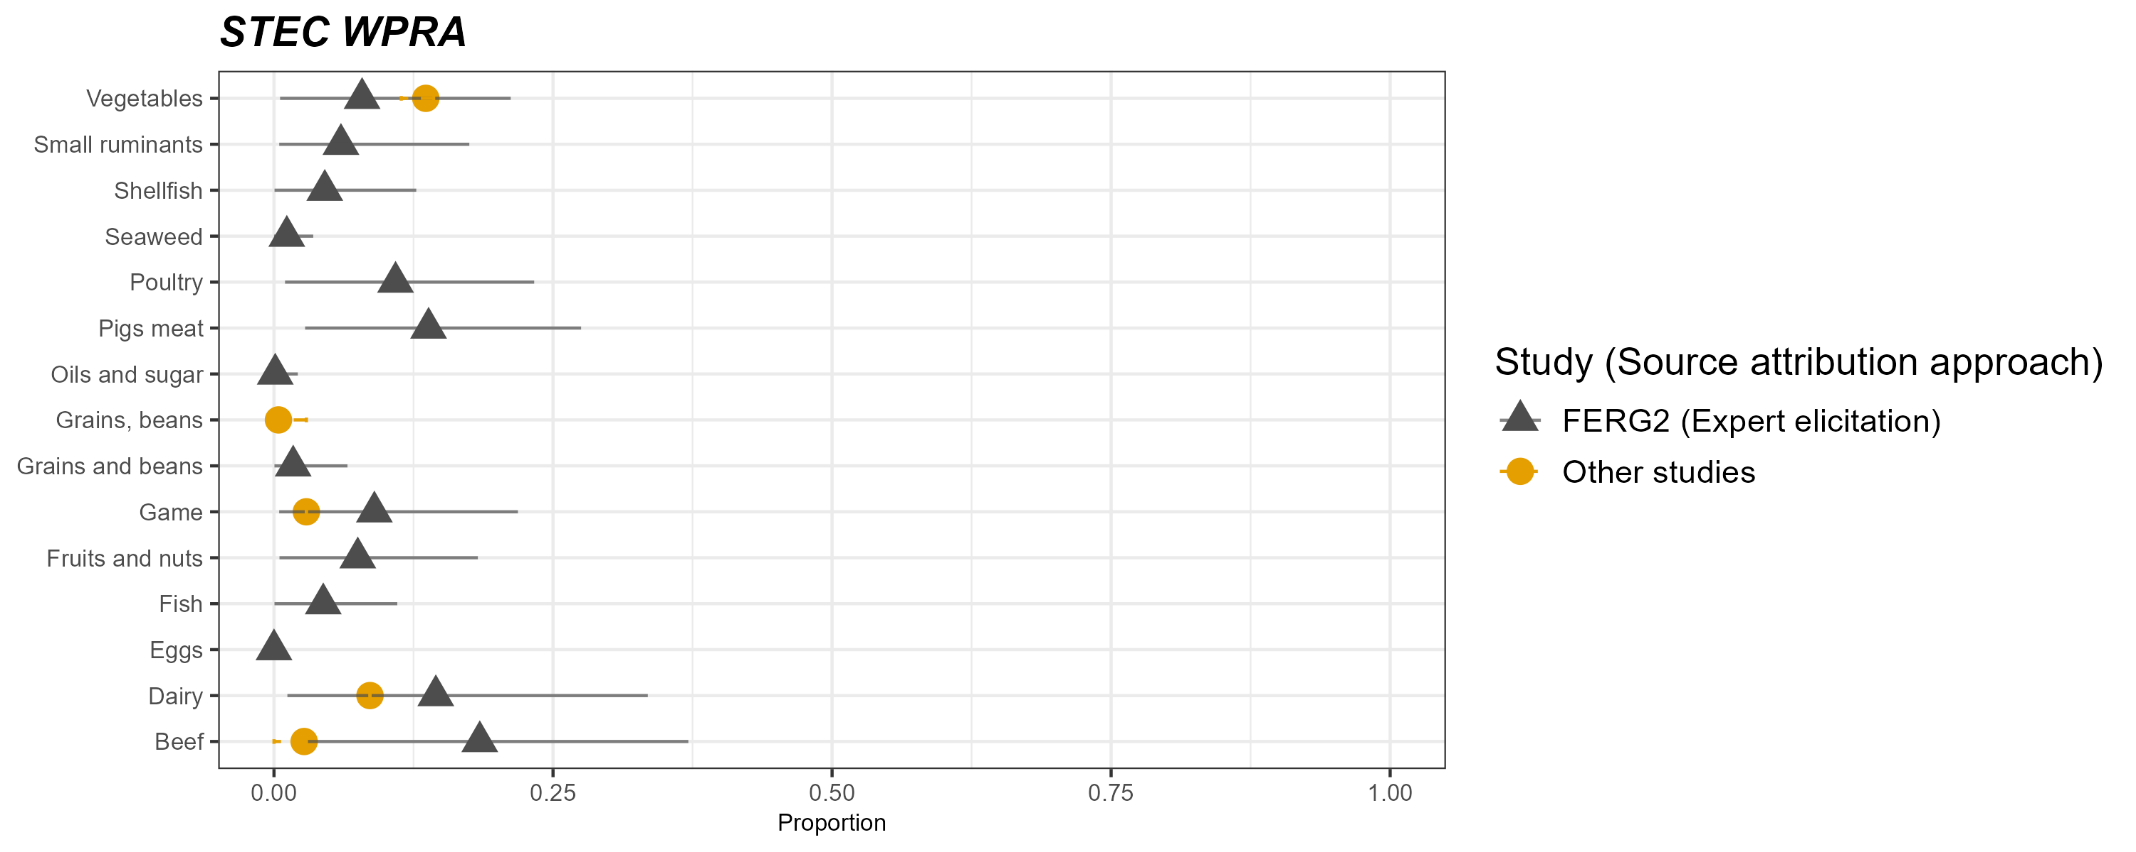


1. Davydova, A. *et al.* Source attribution studies of foodborne pathogens, 2010–2023: a review and collection of estimates. *Food Microbiol.* **131**, 104812 (2025).
